# Supplementary material for: Metagenomics of Neotropical Single-Stranded DNA Viruses in Tomato Cultivars with and without the Ty-1 Gene
Source: PubMed Central journal article supplement (PMC7472167; doi:10.3390/v12080819), 2020-07-28
Supplement: viruses-12-00819-s001.pdf [file viruses-12-00819-s001.pdf]

# Supplementary Materials: Metagenomics of Neotropical Single-Stranded DNA Viruses in Tomato Cultivars with and without the *Ty-1* Gene

**Table S1.** Geographic distribution of 21 species of begomovirus reported naturally infecting tomatoes in Brazil.

| Species                                     | Acronym | Geographic Distribution     |
|---------------------------------------------|---------|-----------------------------|
| <i>Chino del tomate Amazonas virus</i>      | CdTAV   | AM                          |
| <i>Tomato bright yellow mosaic virus</i>    | ToBYMV  | BA                          |
| <i>Tomato bright yellow mottle virus</i>    | ToBYMoV | TO                          |
| <i>Tomato chlorotic mottle virus</i>        | ToCMoV  | BA, MG, DF, ES, PE & RJ     |
| <i>Tomato common mosaic virus</i>           | ToCmMV  | RJ, MG & ES                 |
| <i>Tomato golden leaf distortion virus</i>  | ToGLDV  | TO                          |
| <i>Tomato golden leaf spot virus</i>        | ToGLSV  | TO                          |
| <i>Tomato golden mosaic virus</i>           | TGMV    | BA, DF, MG, PR, RN, RJ & SP |
| <i>Tomato golden vein virus</i>             | ToGVV   | GO, DF & MG                 |
| <i>Tomato interveinal chlorosis virus</i>   | ToICV   | PE                          |
| <i>Tomato leaf distortion virus</i>         | ToLDV   | MG & RJ                     |
| <i>Tomato mild mosaic virus</i>             | ToMMV   | MG & RJ                     |
| <i>Tomato mottle leaf curl virus</i>        | ToMoLCV | MG, GO, DF & PE             |
| <i>Tomato rugose mosaic virus</i>           | ToRMV   | MG, GO, DF, SP, PR & BA     |
| <i>Tomato rugose yellow leaf curl virus</i> | TRYLCV  | RS                          |
| <i>Tomato severe rugose virus</i>           | ToSRV   | DF, GO, MG, RJ, SP, PE & RS |
| <i>Tomato yellow spot virus</i>             | ToYVSV  | GO & MG                     |
| <i>Tomato yellow vein streak virus</i>      | ToYVSV  | DF, GO, MG, RS, RJ & SP     |
| <i>Tomato leaf curl purple vein virus</i>   | ToLCPVV | PI                          |
| <i>Tomato interveinal chlorosis virus-2</i> | ToICV2  | GO                          |
| <i>Tomato chlorotic leaf curl virus</i>     | ToCLCV  | PA                          |

Amazonas (AM); Bahia (BA); Tocantins (TO); Minas Gerais (MG); Distrito Federal (DF); Espírito (ES); Pernambuco (PE); Paraná (PR); Rio Grande do Norte (RN); Rio Grande do Sul (RS); Rio de Janeiro (RJ); São Paulo (SP) and Pará (PA). References: Genbank. <https://www.ncbi.nlm.nih.gov/genbank/> and Reis, L. N. A., Metagenomic analysis of the begomovirus diversity in tomatoes in Central Brazil and impact of the *Ty-1* tolerance gene on viral evolutionary dynamics. 2020.

## Sample sequences with *Ty-1* NGS with codes

>B\_GO\_247\_LR\_LVV\_27\_-\_MT215002 Tomato severe rugose virus (ToSRV) - DNA B

```
ACCGGATGGCCGCGGATTTTTCTTATCTGCTACGTGGCGAAATCGTGTACGTTGCCTCGCG
CTTTCCATTTTAATTGAGCGCTTTTTGAAGTCCGCGAAATGAGTTAATTGCTTTTTGAAAT
CCGCTTTTGTGAATCACCTTTAATTTGAATTAAGGTTGGATAGTTCATATTGATCAATCATT
TCGCTGGTTTATTTCTGCTGCTGGTGAATTACAACCGTTCGTTAAAAATATAAGAAATTTAC
GACGTGGACTGTCTAAATTTTACATCTACATAGTTAATTTGACAAATGAATGCATATTTAACT
CTGCTTTTCGTGTGGGTTTACACCACGTCTATAACATATTGTCAGGTTATTTTGTATAAGTATA
ATTTTTATTTTGTCTTATCTTATTATATGAACATGTATCCATTAAGTATAGACGTGGAATGTT
GTTAATCATCGACGAGGTTACTCATCTAATCCCGTATTTAAGCGTTTACACGGAGCGAAAC
GAAGTGATTTCAAGCGTCGTTTCGAGTAATCAGATTAAGAGCATGGATGAGACTAAAATGTC
TGTTTCAGCGGATTCATGAGAACCAGTTTGGCCCTGAATTTGTAATTGGCCACAATTCTGCCA
TATCCACATTCATTACATTCCTACTCTTTGTAAGACTGTCCCGAACCGTTGTAGGTCATACA
```

TAAAGTTAAGACGACTACGTTTTAAAGGAACAATCAAGATTGACCGTGTTTCATGCTGAGGT  
GAATATGGACGGTACAAGTCCAATGATTGAAGGAGTCTTCTCTCTGGTTGTAGTCGTTGATC  
GCAAACCTCATTGGGGCTCATCTGGAACCTGCATTCTTTGATGAGATATTTGGTGCAAGG  
ATTCATAGCCATGGTAATTTGGCAATAGTATCCTCTCTGAAAGAGCGTTTTTACATACGTCA  
CGTTTGGAAGAAAGTAATATCTGTTGAGAAGGATAACAACCATGGTTGATGTTGAAGGAAGT  
ACTATTTTATCTAACAGGCGTTTTAATTGTGGTCATCCCTTTAAGGATATTGACCGTGAATCA  
TGTAATGGTGTTTATGCAAACATAAGCAAGAACGCCCTGTTAGTTTATTACTGTTGGATGTC  
TGATAATGTGTCTAAGGCATCGACATTTGTATCATTGACCTTGATTATGTTGGCTAAATAGT  
AAGTGTAAACGTTAGTAGTAATAATTTAACTCGCTGTAATAATAAATAACAAGTACTTGT  
TCAGTAATAATGTTCAACTCGCAGTAATAACAAAAAATGTGTTAATAATATAGAATTTA  
TTTTAAAGATTTGGCTGTGAAGGAGTACAGTTGCTGTTTATACATTCATGGGCCGCTGCTTT  
AACAAAGTTCGTTAATTGGGCCATTGACAGTGTTATGTTTCGATTGGGCCCTTTGAGCACCAA  
TTACGGACGCAGAATCACCTGGGTCTAATGTGCCTGTACCCAGTCTATGTAATTGTCTGTAT  
GGATGCATCGCGTTCTCTATATCTGAGCCCCGCTCTGATGGGCTTAAGCCTACAGTACTTCT  
AACAGCCCATGACTCTCCGGGCATTATTTCAAGTGGGTTGTGAAGGCCAATCTTGATATTG  
AGGCGGATCTAATCATCTTCCTTTCCCATTTGCCATAGCCTACGTGACTGAAATCAATGTCC  
TTATCTGTAAATTGTTTTGAAAGGATCTTCACCGTTGGGGCACGGAAAGGTATATCAACCGA  
ATGTTTAGCCGTCGAGAGTTTCAGTCTCCCTTTGAATTTAGCGAAGTGGTACTCTGGTGAA  
CGTTCGTGTCACATACTCTGTAGTACAATTTCCATGGAATTGGTCCCTTAAGGGAGAAGAAC  
GACGACGAAAAGTAGTGAAGATCTATGTTACATCTGATAGGAAAGGTCCACGACGCCTGT  
AGTGATTCATTGTCCGTCATTCTTCTGTCATGAATTCGACTATAACTGAACCTACGGCGTTA  
ATTGGTACCTGTTGTCTGTATTCTATTACGCAATGGTCGATTTTCATACAGCTACGACTAAGC  
CTTGCGCTTAATTGAGACGCCGTTGAAGGGAATTGAAGCATTATCTCGGTTAGATCATGGG  
AAAGCTGATATTCATCACGCTTAGATTCTATATAATTAATGCGTTGGGAGGATTCACAAGC  
TGAGATTCCATTATTGAAAATAGGGAGCGCAGCGACAATGTTTGAGGAAAGTTAATAAGG  
GAAGATGATAATTTTTCGTCAACTGAATATATGACAAGAAAATTGTCTGTTGATCCAATTG  
GGAAATTGGAGATGATAATAAGTAAAAAACGAGGAATCAGGAGACGACGAATTGAGAGG  
AGATATTGTCTATTTTAGGTGTAATTGATAAATACCCCTCTACTTGCTCTTTAAATAGAATTT  
TCAAGGCAATGGCATATTTGTAAATATGACCCTTACTACCAAATGGTAGCTGCTCTAAAAC  
CATATGAATTGGTAGTTATGGTAGCTCTTATATAGTAGAAGTTCTCTTTAAGGAGATTGCTA  
CACGTGGCGGCCATCCGTTATAATATT

>A\_GO\_247\_LR\_LVV\_27\_-\_MT215001 Tomato severe rugose virus (ToSRV) - DNA A

ACCGGATGGCCGCGGATTTTTACCCCTTTAGTTTCAATTAAGTAAAGTGATTGTCTGTG  
GCCCAATCATATTGGGCCGTGTCGAGCTTAGATATTTGTAACAACCTAAGGCCCAAGTTGTTA  
AACGGCTATAAATTGAACATACTTTACTTTTGCTTTAATTCAAATGCCTAAGCGTGATG  
CCCCATGGCGTTTAACGGCGGGAACCTCAAAGGTTTCCCGCTCTGTCAATTATTCTCCCCGT  
GCAGGATATGGACCCAAATATAACAAGGCCGCTGAGTGGGTGAACAGGCCCATGTACAGG  
AAGCCCAGGATCTACCGTACTTTGAGAGGCCCAGATGTTCTAGAGGCTGTGAAGGGCCTT  
GTAAGGTTACGTTACGAGTCTCGTCATGATGTTTCCCATATCGGGAAGGTGATTTGTGTG  
TCTGACGTTACACGTGGTAACGGTATTACTACCGTGTTGGTAAGCGTTTCTGCGTGAAGTC  
TGTATATATTTTAGGGAAGGTATGGATGGACGAGACCATCAAGTTGAAGAATCACACAAAT  
AGTGTGATGTTCTGGTTGGTTAGAGATCGGAGACCTTATTCGTCACCTATGGATTTTGGCCA  
GGTGTTC AACATGTTTGACAACGAGCCTAGCACTGCAACTGTTAAGAACGATCTTCGGGAT  
CGTTTTACAGGTCATGCACAAGTTTTATGCCAAGGTTACTGGTGGACAGTATGCCAGTAATGA  
GCAGGCATTAGTGAAGCGCTTTTGAAGGTCAACAACAACGTAGTCTACAACCATCAGGA

GGCAGGGAAATACGAGAATCATACTGAGAACGCCTTGCTATTGTATATGGCATGTACTIONCAT  
GCCTCTAACCCCGTGTATGCTACATTGAAAATTCCGATCTATTTTTATGATTCCGATTACTAAT  
TAATAAAATTTAAATTTTATTGAATGATTTTCGAGTACAGCATTACATATGATTTGTCTGTT  
GCGAAACGAACAGCTCTGATTACATTATTAATGGAATAACGCCTAATCGATCTAGATACA  
ATAAGACTAAATATTTAAATCTAGTTAAATATGTCGTCCCAGAAGCTGTCAGTGAAGTCGT  
CCATATCTGGAAGTTGAGGAAGCTCTTGTGGAGATGCAAYGCTCTCCTCAGGTTGTGGTTGA  
ACCGTATTTGGACGTGGTAGACTCTGCTCGCGGIGTACATTGGATCCTCCACTCTGTTTATCT  
TGAAATAGAGGGGATTGATATCTCCCAAATATAGACGCCATTCTCTGCCTGACGTGCAGT  
GATGAGTCCCCTGTGCGTGAATCCATGTCCTCTGCAGTCGATGTGTACGTAAATAGAGCAC  
CCGACTCTATATCAATTCGTCGTCTCTGATTCTCTCGTTTTTTAGCAGCTCTGTGTTGTACCT  
TGATAGAGGGGGGTGTTAAGGAAGACGAATTCGCATTGTGCTTTGTCCAATTATTTAGACT  
TGCATTTTCTTCTTTGTCGAGGAAACATTTATAGCTGGCCCCCTCGCCAGGATTGCAAAGCA  
CGATGCATGGGATACCACCTTTAATTTGAACTGGCTTTCCGTATTTGCAGTTTGATTGCCAAT  
CCTTTTGGGCCCAAGCAATCTTTCCAGTGCTTTAACTTTAGATAGTGCGGTGGCATGTCAT  
CAATGACGTTATATTCAACATGATTTGAATAAACCCCTAGGATTGAAATCTAGGTGTCCACTC  
AAATAATTATGGGCCCTAATGCACGTGCCACATCGTCTTTCCCGTTGAGAATCACCTTC  
AATGATGATACTAATAGGTCGTTCCGGCCGCGCAGCGGCACCTCTCCAAAATAGTCATCT  
GCCAATCTTGATCTCTCCAGGCACGCTAGTGAAAGAGGAGAGGGGAAACGTAGGGGCC  
CATGGCTCCGGAGCCCTTGTAATATCCTATCTAAATTACTATTTAGATTGTGAAACTGAAA  
TAAGAACTTTTCAGGCAGCTTCTCACGGATTATCTGCAAGGCGACGTCTTTGGAAGGTGCGT  
TCAAGGCTTCTGCGGACGCTGTTAGCTGTCTGGCAACCGCCTCTAGCACTTCTTCCGTCG  
ATTTGGAATTCCTCCACTCGATAGTATCTCCGTCCTTGTGACATAGGATTTGACGTGCGA  
CGATGACTTAGCTCTCTGAATGTTCCGATGGAATGTGTTGACCTTGTGGGGAGACCAGGT  
CGAAGAATCGTTGATTTTGGCAGCAGTAGTTGCCCTCAAATTGAAGAAGCACGTGGAGATG  
AGGCTCCCCATTTTCATGGAGCTCTCTGCAAACCTTGATGAACTTCTTATTTGTAGGAGTGTT  
TAGGGTTTTTAATTGGGAAAGTGCTTCTTCTTTGATAATGAGCATTGTTGGATATGTGAGGA  
AATAATTCTTCGCTTTTATTTGAAAGCGCTTTGGAGATGATGGCATATTTGTAAATATGACC  
CTTACTACCAATTGGTAGCTGCTCTAAACTCATATGAATTGGTAGTTATGGTAGCTCTTAT  
ATAGTAGAAGTTCCTTTAAGGAGATTGCTACACGTGGCGGCCATCCGTTATAATATT

>B\_DF\_227\_LR\_LVV\_26\_-\_MT215007 Tomato rugose mosaic virus (ToRMV) - DNA B

ACCGGATGGCCGCGGATTTTTCTTATCTGCTACGTGGCGAAATCGTGTACGTTGCCTCGCG  
CTTTCCATTTAATTGAGCGCTTTTTGAAGTCCGCGAAATGAGTTAATTGCTTTTTGAAAT  
CCGCTTTTGTGAATCACCTTTAATTTGAATTAAGGTTGGATAGTTCATATTGATCAATCATT  
TCGCTGGTTTATTTCTGTCGTGGTGAATTACAACCGTTCGTTAAAAATATAAGAAATTTAC  
GACGTGGACTGTCTAAATTCATCTACATAGTTAATTTGACAAATGAATGCATATTTAAACT  
CTGCTTTCGTGTGGGTTACACCACGTCTATACATATTGTCCAGGTTATTTGTATAAGTATA  
ATTTTTATTTGTCTTATCTTATTATATGAACATGTATCCCATTAAGTATAGACGTGGAATGTT  
GTTAATCATCGACGAGGTTACTCATCTAATCCCGTATTTAAGCGTTTACACGGAGCGAAAC  
GAAGTGATTTCAAGCGTCGTTGAGTAATCAGATTAAGAGCATGGATGAGACTAAAATGTC  
TGTTGAGCGGATTCATGAGAACCAGTTTGGCCCTGAATTTGTAATTGGCCACAATTCGCCA  
TATCCACATTCATTACATTCCCTACTCTTTGTAAGACTGTCCCGAACCGTTGTAGGTCATACA  
TAAAGTTAAGACGACTACGTTTTAAAGGAACAATCAAGATTGACCGTGTTTCATGCTGAGGT  
GAATATGGACGGTACAAGTCCAATGATTGAAGGAGTCTTCTCTGTTGTAGTCGTTGATC

GCAAACCTCATTGGGCTCATCTGGAACCTGCATTCTTTTGATGAGATATTTGGTGCAAGG  
ATTCATAGCCATGGTAATTTGGCAATAGTATCCTCTCTGAAAGAGCGTTTTTACATACGTCA  
CGTTTGGAAAGAAAGTAATATCTGTTGAGAAGGATACAACCATGGTTGATGTTGAAGGAAGT  
ACTATTTTATCTAACAGGCGTTTTAATTGTGGTCATCCCTTTAAGGATATTGACCGTGAATCA  
TGTAATGGTGTTTATGCAAACATAAGCAAGAACGCCCTGTTAGTTTATTACTGTTGGATGTC  
TGATAATGTGTCTAAGGCATCGACATTTGTATCATTGACCTTGATTATGTTGGCTAAATAGT  
AAGTGAATACGTGATTAGTAATAATATTTAACTCGCTGTAATAATAAATAACAAGTACTTGT  
TCAGTAATAATGTTCAACTCGCAGTAATAACAAAAAATGTGTTAATAATATAGAATTTA  
TTTTAAAGATTTTGGCTGTGAAGGAGTACAGTTGCTGTTTATACATTCATGGGCCGCTGCTTT  
AACAAAGTTCGTTTAAATTGGGCCATTGACAGTGTTATGTTTCGATTGGGCCCTTTGAGCACCAA  
TTACGGACGCAGAATCACCTGGGTCTAATGTGCCTGTACCCAGTCTATGTAATTGTCTGTAT  
GGATGCATCGCGTTCTCTATATCTGAGCCCCGCTCTGATGGGCTTAAGCCTACAGTACTTCT  
AACAGCCCATGACTCTCCGGGCATTATTTCAAGTGGGTGTGAAGGCCCAATCTTGATATTG  
AGGCGGATCTAATCATCTTCCTTTCCCATTTGCCATAGCCTACGTGACTGAAATCAATGTCC  
TTATCTGTAAATTGTTTTGAAAGGATCTTCACCGTTGGGGCACGGAAAGGTATATCAACCGA  
ATGTTTAGCCGTCGAGAGTTTCAGTCTCCCTTTGAATTTAGCGAAGTGGTACTCTGGTGAA  
CGTTCGTGTCACATACTCTGTAGTACAATTTCCATGGAATTGGGTCCTTAAGGGAGAAGAAC  
GACGACGAAAAGTAGTGAAGATCTATGTTACATCTGATAGGAAAGGTCCACGACGCCTGT  
AGTGATTCATTGTCCGTCATTCTTCTGTCATGAATTCGACTATAACTGAACCTACGGCGTTA  
ATTGGTACCTGTTGTCTGTATTCTATTACGCAATGGTCGATTTTCATACAGCTACGACTAAGC  
CTTGCGCTTAATTGAGACGCCGTTGAAGGGAATTGAAGCATTATCTCGGTTAGATCATGGG  
AAAGCTGATATTCATCACGCTTAGATTCTATATAATTAATGCGTTGGGAGGATTCACAAGC  
TGAGATTCCATTATTGAAAATAGGGAGCGCAGCGACAATGTTTGAGGAAAGTTAATAAGG  
GAAGATGATAATTTTTCGTCAACTGAATATATGACAAGAAAATTGCTGTTGATCCAATTG  
GGAAATTGGAGATGATAATAAGTAAAAAACGAGGAATCAGGAGACGACGAATTGAGAGG  
AGATATTGCTATTTTAGGTGTAATTGATAAATACCCCTCTACTTGCTCTTTAAATAGAATTT  
TCAAGGCAATGGCATAATTTGTAATATGACCCTTACTACCAAATGGTAGCTGCTCTAAAAC  
CATATGAATTGGTAGTTATGGTAGCTCTTATATAGTAGAAGTTCTCTTTAAGGAGATTGCTA  
CACGTGGCGGCCATCCGTTATAATATT

>A\_DF\_227\_LR\_LVV\_26\_-\_MT215006 Tomato rugose mosaic virus (ToRMV) - DNA A

ACCGGATGGCCGCGGATTTTTTTAAGGCCATTTATTTTGGGCCTCTCTTTGGGCCTTAC  
CTTTAATTTTAATGAAAGTAATTTTGACCCAATCATGATGCATTGACGAGCTAAGATATTT  
AGAACTACTTAACGCCCAAGTTGCATAACGGCTATAAATTAACGTACATATGTCGATAGC  
TTTAATTCAAATGCCTAAGCGCGATGCCCCATGGCGCCACATGGCTAGTACATCTAAGAT  
TAGCCGGGGCGTTAATAATTCTCCACGTGCAGGAGTTGGGCCACGGTCCAACAAGGCCACT  
GACTGGGTAAACAGGCCCATGTACAGGAAGCCAAGATATATCGGATGTATAGAACCCCC  
GATGTTCCAAGGGGTTGGAAGGCCCATGTAAAGTGCAGTCGTTTGAACAGCGTCACGATA  
TCTCCATACTGGTAAGGTGATATGCGTCTCCGATGTGACACGTGGTAACGGTATTACACAC  
CGTGTGGGTAAGCGTTTCTGTGTTAAGTCTGTGTATATTCTGGGTAAGATATGGATGGATGA  
GAACATCAAGTTGAAGAACCACACGAACAGTGCCATGTTCTGGTTGGTCAGGGACCGTAG  
ACCTTATGGTACCCCTATGGACTTTGGCCAGGTGTTTAAACATGTTTCGACAACGAGCCTAGCA  
CCGCCACTGTGAAAAACGATCTCCGTGATCGTTTTCAAGTCATGCATAAGTTCTATGCTAAG  
GTCACAGGTGGACAATACGCAAGCAACGAGCAGGCGCTTGTCAAGCGGTTCTGGAAGGTC

AACAATCATGTCGTCTACAACCATCAAGAAGCTGGAAAATACGAGAATCATACGGAGAAC  
GCCCTATTATTGTATATGGCATGTACTCATGCCTCAAACCCCGTGTATGCAACTTTAAAAAT  
TCGGATCTATTTTTATGATTCGATAACAAATTAATAAAATTTTGAATTTTATTGAATGATTCTC  
GAGTACAGCATTACATATCGTCTGTCTGTTGCGAAGCGAACAGCTCTAATTACATTATTAA  
CTGAAATAACGCCTAGCTGATCTATGTACAACATAAGTAAATATTTAAATCTATTTAAATAT  
GTCATCCCAGAAGCTCTCAGGGATGTCGTCCAGATTTGGAAGTTGAGATAAGCCTTGTGGA  
GACCCAGTACTCTCCTCAGGTTGTGGTTGAACCGTATTTGGACGTGGTAGACTCTGGTCCCTC  
GTGTATAGTATGTCTCGACGTTGTACATCTTCAAATAAAGGGGATTTGATATTTCCCAAGT  
ATACACGCCATTCTCTGCCTGATGTGCAGTGATGAGTTCCCCTGTGCGTGAATCCATGTCCT  
GCGCAATCTATGTGTACGAAAATGGAGCAGCCGCACTGTAAATCAATTCGTCTTCTTCGTAT  
AGCTCTCCTCTTAGCAGCCCGATGTTGAACTTTGATAGAGGGGGGAGTTGAGGAAGATGAA  
TTGTGCATTGTGCTTTGTCCAACACTTAATGCTGAGTTCTCCTCTTTGTCGAGGAAACATTT  
ATAGCTGGCCCCCTCGCCAGGATTGCAAAGCACGATGCATGGGATACCACCTTTAATTTGA  
ACTGGCTTTCCGTATTTGCAGTTTGATTGCCAATCCTTTTGGGCCCAAGCAATTCCTTCCAG  
TGCTTTAACTTTAGATAGTGCGGTGCATCAATGACGTTATATTCAACATGATTTGA  
ATAAACCTAGGATTGAAATCTAGGTGTCCACTCAAATAATTATGGGCCCTAATGCACGT  
GCCACATCGTCTTTCCCGTTGAGAATCACCTCAATGATGATACTAATAGGTGCTTCCGG  
CCGCGCAGCGGCACCTCTCCCAAATAGTCATCTGCCAAGCTTGCATCTCTCTCGGTACGC  
TAGTGAAGAGGAGAGGGGAAACGTAGGGGCCCATGGCTCCGGAGCCCTTGAAATATCC  
TATCTAAATACTATTTAGATTGTGAAACTGAAATAAGAATTTTCAGGCAGCTTCTCACGG  
ATTATCTGCAAGGCGACGTCTTTGGAAGGTGCGTTCAAGGCTTCTGCGGCAGCGTTCGTTAGC  
TGTCTGGCAACCGCCTCTAGCACTTCTCCGTCGATTTGGAATCCCCCCTCGATAGTATC  
TCCGTCCTTGTGACATAGGATTTGACGTCCGACGATGACTTAGCTCTCTGAATGTTCCGAT  
GAAATGTGTTGACCTTGTGGGGAGACCAGGTGCAAGAATCGTTGATTTTGGCAGCAGTA  
GTTGCCCTCAAATTGAAGAAGCACGTGGAGATGAGGCTCCCCATTTTCATGGAGCTCTCTG  
CAAACCTTGATGAACTTCTTATTTGTAGGAGTGTTTAGGGTTTTTAATTGGGAAAGTGCTTCT  
TCTTTGATAATGAGCATTGGGATATGTGAGGAAATAATCTTCGCTTTTATTTGAAAGCG  
CTTTGGAGCTGATGGCATAATTTGAAATATGACCCTTACTACCAAATGGTAGCTGCTCTAAA  
ACTCATATGAATTGGTAGTTATGGTAGCTCTTATATAGTAGAAGTTCCTTAAGGAGATTGC  
TACACGTGGCGGCCATCCGTTATAATATTACACACGTGGCGGCCATCCGATATAATATT

>A\_DF\_529\_LR\_LVV\_25\_-\_MT215005 Tomato mottle leaf curl virus (ToMoLCV) - DNA A

ACCGGATGGCCGCGCGGGTTTTTTTTGACCCGCTCCGTGATGTATTTTTTGTCTTTTACTATGT  
GGTCCAGTCAATAAATGACAAATATGACCGTCCAATCAGAAATGGTCCTCAAAGCCTAATT  
ATTTAAAAATACTTGGTCACTAAGTTTGGTAAAGTTTATAAATGGTCCTTCTCGTAATGTTA  
TACCAACTTTAAGTCATAATGCCTAAGCGTGATGCCCCATGGCGCTCAATGGCGGGGACCT  
CAAAGGTTAGTCGGTCCGCCAATTTCTCCCCTCGTGGAGGAATCGGGTCAAATCAGAGAA  
GGCCAGGCCTGGGTTAACAGGCCCATGTTTCAAGGAAGCCAGGATATATCGGATGTATAGA  
ACCCCGATGTACCAAAGGGATGCGAAGGCCCATGTAAGGTCCAATCCTTCGAGCAGCGT  
CACGATGTCTCTACATACGGGGAAGGTGATGTGATTTCCGATGTCACCTCGTGGTAACGGTAT  
TACCCACCGCGTGGGTAAACGTTTTTGTGTCAAGTCTGTGTATATATTAGGCAAGGTCTGGA  
TGGACGACAACATCAAGTTGAAGAACCACACGAATAGTGTGATGTTCTGGTTAGTTAGGGA  
CAGGAGACCGTATGGCACTCCCATGGATTTTGGCCAGGTGTTCAACATGTTTGACAACGAG  
CCCAGTACTGCCACGGTGAAGAACGATCTCCGCGATCGTTACCAGGTCCTGCACCGTTCT

ATGCCAAGGTTACAGGTGGACAATACGCCAGCAACGAGCAGGCTATTGTCAAGAGGTTCT  
GGAAGGTCAACAACCATGTGGTGTACAACCATCAGGAGGCTGGGAAATACGAGAATCATA  
CGGAGAACGCTCTTATTGTATATGGCATGTACTCATGCCTCTAACCCCGTGTATGCTACTT  
TAAAAATTCGGATCTATTTTTATGATTGATAACAAATTAATAAAGTTTAAATTTTATTGAAT  
GATTTTCGAGTACATAATTTACATATGGTTTGTCTGTTGCGAATTGAACAGCTCTAATTACAT  
TATTAATAGAAATGACTCCTAAACGATCTAAATACATATTAATACTAAATCCCTAAACCTATTT  
AAATAAGTTCGCCAGAAGCTGTCTGTTGACGTCGTCCATATTTGGAAGTTGAGGAAGCACT  
TGTGGAGATCCAACGCTCTCCTCAGGTTGTGGTTGAACCGTATCTGTATGTGGTATATCCTTG  
TGTTTCGTGTGTATCGGGTTCTCTACGTTTGTATCTTGAAATATAGGGGATTGTTGGACCTCCC  
AGATAAACCGGCCATTCTGTGCCTGACGTGCAGTGATGAGTTCCTCGGTGCGTGAATCCATT  
GCCGATGCAGTCGATGTGTTGGTATATGGTGCAGCCACAGTTTAGGTCTATGCGCTTGCCTC  
GAATGACCCTCTTCTAGCTATCCTGTGTTGTGGTTTTATAGAGGGGGGTGTCGAGGAAGAT  
GAATTTTGCATTGTGGAGTGTCCAGTTTTTGAGGGCTGTGTTTTCTCTTTGTGAGAAAATC  
TTTATAGCTGGCCCTTCTCCTGGATTGCATAGCACGATTGAGGGTATCCCTCCTTTAATTTG  
AACTGGCTTTCCGTATTTGCAGTTTGATTGCCAGTCTTTTTGGGCCCAATGAGCTCTTTCCA  
ATGCTTCATCTTTAGATATTGCGGAGTGATGTCATCAATGACATTGTACTCCGCTTCGTTTGA  
GTA AACCTAGGATTGAAATCCAGGTGTCCACTCAAATAGTTATGTGGGCCAATGCACGC  
GCCACATCGTCTTCCCGTCTCGAATCACCTCGATGATCAAATAATAGGTCTCTCCGG  
CCGCGCAGCGGGATCCAGACCAAATAATCATCAGCCACTCTTGCATCTCCTCCGGAACC  
TCAGTAAAGGAGGAGAGTGAAACGGAGGAACCCATGGTTCGGAGCCTTTTGAAAGATG  
CGTTCTAAATTAGAATGGATGTTGTGATGTTGAAGGACGAAGTCCTTCGGTTGCTCCTCCCT  
CAATATATTGAGGGCCTCCATGACGGATCCTGCGTTGAGGACCTTGGCATACTGTGCTGTTGG  
CAGATTGCTGACCTCCTCTAGCTGATCTGCCGTCGATCTGGAAAACCTCCATGATCAATGAAG  
TCTCCGTCTTTCTCCACGTAGGATTTGACATCTGATGAGCTCTTAGCTCCCTGAACGTTCCGA  
TGAAATGTGTTGATCTGGTTGGGGATATGAGGTGCAACAATCGTTCGTTTGTGCACTGTAA  
TTTCCCTTCGAACTGGATGAGCACGTGGAGATGAGGTTCCCATCTTCGTGTAATTTCTCTGG  
CAACTCGGACGAACAATTTAATACTGGCGTCTGTAACCCTAATAATTGAGATAGAGCTTCT  
TCTTTTGTAAAGAGCACTTTGGATAAGTGAGGAAATAATTTTTAGAGTGGATTCTAAAACG  
ACGTGGTAATGGCATTTTTGTAAATTAAGGCGTGTACACCAATTGAGTTCTCTCTAAAACCTCT  
ATGGCAATTGGTGTATTGGGGTACAATATATACTAGAAGTCTCTATAGA ACTCTTAATCATA  
GTCACACACGTGGCGGCCATCCGTATAATATT

>B\_DF\_640\_AA\_LVV\_23\_MN147864 Tomato mosaic severe dwarf virus (ToMSDV)- DNA B (New species #1)

ACCGGATGGCCGCGATTTTTTGGTGTCTGACCCGCTACCGCATTGGAGCTCCGCGTGT  
TGATTTATTGACCCGGTCCCCTGTTGGCGTTCGCATGTTTTGGTGTCCCGTCCCGCTGCCG  
CAATTGGGTCTGTGCTCCACGTGGTGGTCTTAGTGCAATCATTCAAACAAGATGAATC  
AAATTAAGTGGAGTTTATTTATGTCGTCGAATCATATTGCTGCTGATGAGCTTAGTTGTAA  
TTCTTGATGTCGATGTTGTTGACTCATCTTTAATTTGAAATTTGAATTATCGTGGCTCGTCGTC  
CAACTAAGTCTTATGTTTATAATGATTAGGTCATCTGTCTCTACGAAGGAAAAGTGTGACGT  
GGACCAATAATTGTTTAACTACGGACTTTATTTACGTGATATAATGAACAAGGAATTTATA  
TATAAGTGTCTTATTGATTGAGGTTGAATTAATGTGTCAAATGTATCCTAGTAAATATAGA  
CGTGGGGTGACGTCAACTCAGCGACGAGGTTATTCACGATATCCCGTGTTCAGCGTTCCTA  
TGGTGCTAAACGTATCGATGGGAAACGTCCGTGAGTAATTCGAACAAGTCACAAGAAGA  
GAGCAAGATGTCTGCTCAACGTATACACGAAAACCAGTATGGCTCAGAATTTGTGATTGCA  
CATAATTGTGCTATATCAACATTTATAACGTTCCCTAGTCTTGGTAAGACGGAGCCCTGCCG

ATCACGTT CATATATTAAGTTAAAACGATTACGTTTTAAAGGTATAGTAAAACCTTGAACGTG  
TCAACCTGATGTGAATATGGACGGCTCAACTCCAAGACCGAGGGAGTATTTTCCTTGGTT  
ATTGTTGTTGATCGTAAACCTCATCTGAGTGCATCCGGAAGTCTCCACACATTTGACCAGCT  
ATTTGGTGCAAGGATTCATAGTCATGGCAACTTAGCCATAACTCCTTCGTTGAAAGAGCGTT  
TCTATATACGACACGTGGTTAAACGTGTTGTGTCGGTTGAGAAGGACACGATGATGATTGA  
CCTTGAAGGAGCTACATCCTTGTCTAATAGGCGTTATAATTGTTGGTCTGCGTTAATGATCT  
TGAACGCGATTCATGTAATGGGGTATATTCTAATATTAATAAGAATGCCCTATTAGTTTATT  
ATTGCTGGATGTCTGATGTTGTTTCAAGGGCGTCGACATTTGTATCATTTGACCTTGATTATG  
TTGGTTGATTATTAAGTTAACCGTGTGATTTGCATAAAATATAGACAAGTGTGTACTGATT  
GTTATATTATAAATCCAAAAAATAATTATAAATAAGATATGGTCTTGCAAAATAAATAATT  
GTAATAACTTTATATTTATTTAATGACTTGGGTTGTTGTGGAGTACAATTTGTGTTAATGCA  
CTCTTGACCCTGTCCTACAATATCGTTTAGTTGGGCCAACGACATTGTTATGTTGGATTG  
TGTCTTTGAGCCCCGACTATTGAAGCTGATTCACCTGGGTCTAGCATGGCGGTCCCTAGTC  
TGTTGAGTTCTCGATACGGATGTATTGTGTACCTATGTCGGACTCCGAATTTTCATGGCTGT  
ATCCTATCGTGCTTCTGGTAGCCCATGACTCTCCGGGCTTTAGTTCAATTGGGCCGGGTAGC  
CAAATCTAGACGTGGAAGCGGATCGTATGAGCTTTCTCTCCCATTTTCCGTAGCCACATG  
ACAGAAATCTATGCTTTTTCTGTGAACTGCTTAGACAAGATTTTAAACCGTCGGAGCTCGGA  
ATGGGATATCAACTGAATGTTTAGCAGTGGACAGTTTGTGTTTGCCTTTAAATTTGGCGAAA  
TGTGTGCTCTGATGTACGTTGGTGTGCGAACTCTGTAATATAGCTTCCATGGAATTGGGTC  
CTTTAGGGAAAAGAAGGAAGAGGAGAAATAATGTAGATCTATGTTACACCTGATCGGAAA  
TGTCCATGACGCTTGTAAAGGATTCGTTGTCTGTCTATCCTTTGTGATGAATCTCGACAATTAC  
CGAACCTGTAGCGTTGATAGGTAAGTGTGTTGTTGATTCGATGACGCAGTGGTCGATCTTCA  
TACAGCTACGACTGAGCCTTGCCTTAATTGAGCTGTAGTAGACGGAAATTGCAAGATGAT  
CTCAGTTAGATCATGCGATAGTTGATACTCGTCGGATGAGATTGATATAATTAAGGCGT  
TTGGTGGGTGTACTAGCTGAGAATCCATTATAAGAATTAACCTTATGAAATCAGGTTGCGC  
AGCGAAAGCGTTTAAAGGAAAATGAAAGAGGAAAGAGAATAAGTTATGTAAACTGTGTGGG  
TAATTGATATTGGCACTGCGTTTAAAGAGTTTGTCTCTTTATATAGACAACGAACTGTTTATT  
GAGTATTAATAGACGTATTGAGTATTAATAGACGTATTGTGAAGTTTGTGTCATTTAA  
TCCGTTAATGGCATTTTAGTAAATATGTGTGAGGACACCAGCGATGGCTCTCAACTTCTATG  
CAATGTGTTGGTGTCTGGTGTCCCATTTATACTAAAACCCTCTAGGACACTGGGGGGTACG  
TGGCGGCCATCCGTTAATATT

>A\_DF\_640\_AA\_LVV\_MN147863 Tomato mosaic severe dwarf virus (ToMSDV)- DNA A (New species #1)

ACCGGATGGCCGCGATTTTTGGTGTCCCGACCCGCGCGGCCATTGCGCTGCTTTCTGAC  
GATGGTGGTCCCATGTGTGCGCAATTGTTTCGCGTGAAAGCTTATTTATTTCAAATACTTCGC  
AGCCAAGTTTGGTAAAGTTGTATATATTGTGTATAGATTGTTGACTGACATTTGCCTTTAATT  
CAAAATGTCTAAGCGGGCTGCCCCCTCGTGGCGCTCTATGGCGGGTATCTCAAAGGTTAGC  
CGCTCACTTAATTTCTCGCCTCGTGGAGGTATTAATCCCAAATTTGATAGGGCCTCAGCGTG  
GGTCAATCGACCCATGTACAGGAAGCCAGGATATATCGGACTATTGCAAGCCCTGATGTC  
CCTAAAGGGTGTGAGGGGCCTTGTAAAGTCCAATCATTGAAACAGCGCCACGATATCTCCC  
ATACCGGAAGGTGCTGTGTATATCTGATGTGACACGGGGCAGTGGTATTACCCACCGTGT  
CGGTAAGCGTTTTTTCGCTGAAGTCCGTTTATTTTTAGGCAAGGTATGGATGGACGAGAAC  
ATCAAGTTGAAGAACCATACGAACAGCGTCATGTTCTGGTTGGTTAGAGACAGGAGACCCT  
ATGGCACGCCGATGGATTTTGGACAGGTGTTCAACCTGTTTGATAATGAGCCCAGTACTGC  
GACTGTGAAGAACGATCTCCGGGATCGTTTCCAAGTGTGACACAGATTCCACACTAAGGTG

ACGGGTGGACAGTATGCGAGCAACGAGCAGGCTCTTGTCCGGCGATTTTGGAAAGGTCAAC  
ACCCATGTTGTGTACAACCATCAGGAAGCTGCGAAGTATGAGAACCACACGGAGAACGCC  
CTCTTATTGTATATGGCATGTACTCATGCATCTAACCTGTGTATGCAACCCTTAAGATCCG  
GATCTATTTCTACGATTCGGTATCGAATTAATAAAGTTTGAATTTTATTGAATGATCTTCGAG  
TACAGATGTTACATATGGTCTGTGTGTTGCGAAACGAACAGCTCTAATTACATTATTAATGG  
ATATAACGCCCAAACCTATCTAAATAAAACATGATGAAATGTCTAAATCTATCTAAATATGT  
CGTCCCAGAAGCTGTCACTGAAGTCGTCCAGACTTGGAAGTTCAGGTATGCCTTGTGGAGA  
TCCAACGCTCTCCTGAGGTTGTGGTTGAACCGTATCTGGATGTGGTAGACTCTGGTCTGGT  
GTAGAGTGGGTCTTCGACTCGGTATATCTTGAAATATAGGGGATTTGGTACTTCCCAGATAT  
ACACGCCATTCTCCGCTTGAGGTGCAGTGATGAGTTCCTGTGCGTGAATCCATGACCGAC  
GCAGTTGATGTGGACGTATACTGAGCACCCGCAGTTGAGGTCTATTCGTCTACGTCAATTG  
CCCTGCGCTTGGCTGCTCTGTGTTGAGCTTTGATAGAGGGGGGATTCGAGGAAGACGAACC  
TCGCATTCTTGAGAGTCCAATTTCTTAGGGATGCGTTTTCTCTTTGTGCGAGGAAATATTTAT  
AGCTGGCTCCTTCGCCAGGATTGCAGAGCACGATTGATGGTATACCTCCTTAATTTGAACT  
GGCTTTCCGTATTTGCAGTTTGTCTGCCAGTTGCTTTGGGCCCAATTAATTTCCAGTGCT  
TTAACTTTAAATAATGAGGAGGGATGTCATCAATGACGTTGTACTCTGCATTATTGTTGTAA  
ACCCTAGAATTCAAATCAATGTGGCCGCTGATATAATTGTGGACCCCAATGCTATGGCCC  
ACATCGTCTTCCCCGTCCTCGAATCCCCCTCAATAATTAACCTAATAGGTCTCTCCGGCCGC  
GCAGCGGAACCCCTTCCAAAATAGTCATCTGCCATTCTGCATCTCCGCGGGAACGTTAG  
TGAACGATGAGAGGGGAAACGGAGGAACCTCGGTCAGGAGCTTTTGGAAAGAGACGTT  
CAATGTTAGCCTTTACGTTATGATAACTTACAACGAACGCTTGGGGTCTCCTGCTCTGATA  
ATCTCCAGAGCCTCTCCTGCACTAGCTGCATTAACCTGCGTTGTGGTAGACGTCGTCTTTATTG  
GCCTTCGTACCCCCAGACACCTTGTATTGTCCGGATTCACAATAATCACCTCTTTGGTGAT  
GTAATCTTGACGGCGTTGGTGTCTTGGCTGCCTGAATATTTGGGTGAAAAGTGGCAGACC  
TTCTGGGGTGAGTGAGGTCGAAAAATCTAACATCCTTGATGTTAGACTTTCCTGAGAGTTGT  
ATAAGACAATGGAGGTGGGGGAATCCGTCGGAGTGTTCCCTCCCTGGCGACTCGTATATATG  
TGGGTTTGACGATTGACCATGGAAGGGATTGAAGCATTGAAGAGCTTCATCTTTTGGTATA  
TCGCATTGGGGATATGTGAGGAATATATTTTGGCAGCAAGCCTAAATTGATTAGGGTTTCG  
TGGCATTTTGGTAAATATAGGGCAGGACACCAGCAATGGCTCTCAACTTCTATGCAATGTGT  
TGGTGTCTGGTGTCCCATTTATACTAAAACCCTCTAGGACACTGGGGGGCACGTGGCGGC  
CATCCGTTTAATATT

>B\_GO\_308\_LR\_LVV\_24\_-\_MT215004 Tomato chlorotic mottle virus (ToCMoV) - DNA B

ACCGGATGGCCGCGGATCTTTCTCACTCTTTAATCCTGTCCGTCCACGTGTTAATGAATT  
TAGTTGAGCGCGAATTTGAAGTCCGTGAATTGTGTTGAGCGCTTTATTTGAGTCCGCTTTCG  
GATGGCCGCCACGTCCATATATCTAAGACCGTTGAATTAATATGATAAGCGGAACCTTAT  
CGAATTTTGCATGGTGTTTTTTATTGGTGATTAATTTTGAATTCGACCGTTAGATTGCACTT  
GATATTGAATATCGACCATCGTTCTCGAATAATGTGTCATTTGTACAAGTATTTGTTATGTGT  
GCAATCATAACAACATTACCTTAACTTGGACCAATTAATATTGACAGTATAACCAAAATAA  
CCCATTGATGCAATTACAGCTATCTATATAATGCGATTGATATGGATAATTATAAAAACGTCC  
AGTAAGAATTTGAACATGTATTTAATACTAATAAGCGTCGTTGGTTATCCATCAACCGTC  
GTAATTACGTGCGATATCCTACGTTTAAAAAGTCACATTCTGTGGTACGCAATGATGGGAA  
ACGTCGACTGGGTATTTCAAACAAGCCCCACGACGATAGTAAGATGTCTTCGCATACGATT  
CATGAAAACCAATATGGGCCTGACTTTGTATTGGGCCATAACACAGCGTTATCCACTTTTAT  
AACTTACCCTCTCTTGGTAAAAGTGAGCCCAATCGTATTAAGTCATACATTAAGTTGAAAC  
GTCTGCGCTTTAAAGGTAAGTACTGTTAAGATTGAACGTGTTCTACCGATATGAACATGAATGGA



ATACCTGCTAAGATTGAAGGGGTATTTTCTTTGGTTATTGTTGTGATCGTAAACCTCATTG  
AGTCCTTCTGGTAGTCTCTACACATTTCGATGAGTTATTTGGTGCTAGGATCCATAGCCATGG  
AAATTTAGCGATAATCCCGTCTCTGAAGGATCGTTTTTACATACGTCATGTTGCTAAACGTG  
TCTTGTGAGTGGAGAAGGATAGTAATATGATTGACGTTGCTGGGACTACAACACTCTCTAGT  
AGGCGTTATAATTGCTGGGCAAATTTAGAGATTTTCGATCATGAATCCTGTAACGGTGTATA  
TGCTAACATAAGCAAGAACGCCCTACTAGTTTATTATTGTTGGATGTCCGAAACGGTTTCCA  
AAGCATCTACATTGTATCATTGATCTTGATTATATTGGATAATTATATAGATCAATTTGCA  
CATTATAAGTTGATAAGTTTAAATATGATAATAAATTGTCCTAGTGCTTATTAAATACTCAG  
AAAATCTTAATTTATTTAAAGACTTTGGTTCAGATGGAGTACAATTGGTATTAATACATTCT  
TGTAAGTTGACTTAACAATCTCATTTAATTGGGCCAAAGATAATGTAATGTTGGACTGCGT  
TCTTTGCGCCGCAACGATTGACGCTGATTCTCCTGGGTCTAGAATTATCGTGTCCAATCTGTT  
CAGGTCCTTGTATGGATTTAGATCGTTGCCCGTTCGGAGTCCACACATGAATTGCTAAGTC  
CAATTGTAAGTCTGGAGGCCACGACTCTCCAGGTTTAAATTTCTATTGGGCAGTTAAGCCCA  
AATCTGGACGTCGAAGCGCATCTGACTAATTTCCCTCTCCCATGTCCCGTAACCCACGTGAAC  
AAAATCGATATCCTTATCTGAAAATTGCTTCGACAATATTTTAACTGTCGGTGCCCGGAAAG  
GGATATCTACTGAGTGTGTTTGTGTGGATAGTTTAACTTGCCCTTGAAGTGGCGAAATGTG  
TCCTTTGGTGCACATTCGATCGTAACCCGGTAGTACAATTTCCATGGAATTGGGTCCCTC  
AGGGAAAAGAATGACGACGAGAAATAATGTAAGTCTATGTTACATCTAATTGGGAAGGTC  
CATGACGCCTGCAATGACTCGTTGTCCGTCATTGCTTGTCAATGTTTCTACTACGACGGAT  
CCTGTGGCGTTTATCGGGACTTGCTGTCTGTATTTCGATGACGCAATGATCTATTTTCATGCAG  
CTCCGACTGAGTTTAGCACTAATTTGAGATGCCGTAGATGGAAATTGTAAAACAATTTCACT  
TAGATCATGAGACAATTGATATTCATCTCTTTGAGACTCAACATAATTAAGCATTGGAG  
GGATAACCAATTGAGAACTCATTATAATAAAAAAAGGCTGCCGAGCTGAATCGATAACTG  
GAATTGATAAGCGTAATTGATATGAACCCACTAAGAACAATGTCAGAAGACAATATGTGTT  
GCGCTGTGACGATTAACGAAATATATTGTGGTAATGATGATAGTCAGTACTAACTGGTTTGT  
ATTTATAGACGGATTGAAGACTGAGTATATACGAGGAAACAATGCATAGCGACGTCGTTCT  
TTGACGGAATGGCATTCTCTAAATTAAGATAATGGCATAATTTGTAATAATAGTTGGGCACC  
GATTGGGGTCTTCTCAAACCTACTAAAGCAATTGGGGACTGGGGTCTTATATACTAGAAC  
CCTCTATAGAACCTTCAATCTCGTTCACACACGTGGCGGCCATCCGATATAATATT

>A\_GO\_308\_LR\_LVV\_24\_-\_MT215003 Tomato chlorotic mottle virus (ToCMoV) - DNA A

ACCGGATGGCCGCGGATTTTTTTAAGGCCATTTATTTTGGGCCTCTCTTTGGGCCTTCAC  
CTTTAATTTTATTGAAAGTAAATTTGGCCCAATCATGATGCATTTGACGAGCTAAGATATTT  
ACAACACTTAAACGCCCAAGTTGCATAACGGCTATAAATTAACGTGCATATGTCGATAAC  
TTTAATTCAAATGCCTAAGCGCGATGCCCATGGCGCCACATGGCTAGTACATCTAAGAT  
TAGCCGGGGCGTTAATAATTCTCCTCGAGCAGGAGTTGGGCCACGGTCCAACAAGGCCTCT  
GACTGGGTAAACAGGCCCATGTACAGGAAGCCCAAGATATATCGGATGTATAGAACCCCC  
GATGTTCCAAGGGGTTGTGAAGGCCCATGTAAAGTGCAATCGTTTGAACAGCGTCACGATA  
TCTCCATACTGGTAAGGTGATATGCGTCTCCGATGTGACACGTGGTAACGGTATTACACAC  
CGTGTGGGTAAGCGTTTCTGTGTTAAGTCTGTGTATATTCTGGGTAAGATATGGATGGATGA  
GAACATCAAGTTGAAGAACCACACGAACAGTGCCATGTTCTGGTTGGTCAGGGACCGTAG  
ACCTTATGGTACCCCTATGGACTTTGGCCAGGTGTTTAAACATGTTTCGACAACGAGCCTAGCA  
CCGCCACTGTGAAAACGATCTCCGTGATCGTTTTCAAGTCATGCATAAGTTCTATGCTAAG  
GTCACAGGTGGACAATACGCAAGCAACGAGCAGGCGTTGTCAAGCGGTTCTGGAAGGTC  
AACAAATCATGTCGTCTACAACCATCAAGAAGCTGGAAAATACGAGAATCATACGGAGAAC  
GCCCTGTTATTGTATATGGCATGTAATCATGCCTCAAACCCCGTGTATGCAACTTTAAAAAT

TCGGATCTATTTTTATGATTCGATAACAAATTAATAAAATTTTGAATTTTATTGAATGATTCTC  
GAGTACAGCATTACATATCGTTTGTCTGTTGCGAAGCGAACAGCTCTAATTACATTATTA  
CTGAAATAACGCCTAGCTGATCTATGTACAACATAAGTAAATATTTAAATCTATTTAAATAT  
GTCATCCCAGAAGCTCTCAGGGATGTCGTCCAGATTTGGAAGTTGAGATAAGCCTTGTGGA  
GACCCAGTACTCTCCTCAGGTTGTGGTTGAACCGTATTTGGACGTGGTAGACTCTGGTCCTC  
GTGTATAGTATGTCCTCGACGTTGTACATCTTGAAATAAAGGGGATTTGATATTTCCCAAGT  
ATACACGCCATTCTCTGCCTGATGTGCAGTGATGAGTTCCCTGTGCGTGAATCCATGTCTC  
GCGCAATCTATGTGTACGAAAATGGAGCAGCCGCACTGTAAATCAATTCGTCTTCTTCGTAT  
AGCTCTCTTCTTAGCAGCCCGATGTTGAACTTTGATAGAGGGGGGAGTTGAGGAAGATGAA  
TTGTGCATTGTGCTTTGTCCAATACTTAATGCTGAGTTCTCCTCTTTGTGCGAGGAAACATTT  
ATAGCTGGCCCCCTCGCCAGGATTGCAAAGCACGATGCATGGGATACCACCTTTAATTTGA  
ACTGGCTTTCCGATTTTACAGTTTGATTGCCAATCCTTTTGGGCCCAATCAATCTTTCCAG  
TGCTTTAACTTTAGATAGTGCGGTGCACATCATCAATGACGTTATACTGCACATCGTTTGA  
GTATACCTTTGAATTGAAATCGAGGTGACCACTCAAGTAATTATGGGACCCTAATGCACGT  
GCCACATAGTTTTGCCACTTCGAGAATCACCTCGATTATTATACTGATAGGTCTCTCCGG  
CCGCGCAGCGGCATCTCTCCCGAAATAGTCATCTACCCAATCTTGATCTCGACAGGCACG  
TTAGTGAACGACGAGAGTGGAAACGGAGGAACCCAAGGTTCTGGAGCCTTTGCGAAAATA  
CGCTCTAAATTTGACCTAATGTTATGATGTTGAAGCACGAAATCTTTGGGTTGTTCTCTTTT  
AATATATTGAGTGCTTCCATGACTGATCCTGCGTTGAGAACCTTGGCGTACGTGTCGTTGGC  
AGATTGCTGACCTCCTCTAGCTGATCTGCCATCGATCTGGAAAATCCATGATCAACGAAG  
TCTCCGTCTTTCTCCACGTATGATTTGACATCTGACGAGCTCTTAGCTCCCTGTATGTTTGA  
TGGAATGTGCTGACCTACTTGGGGAGACGAGGTGAAGAACTTGTGTTTTTGCAGTTGTA  
TTACCTTCGAATTGGATGAGCACGTGGAGATGAGGTTGCCATCTTCGTGTAGTTCTCTCG  
AGACACGAATGAATAATTTATTAGTTGGTGTGTTTAGGGCTAATAATTGGGAAAGTGCTTCT  
TCTTTGGAAAGAGAACAGTGTGGATATGTTAGAAAATAATTTTGAATTTACTCGGAAAT  
GTTTGGGCGGTGGCATATTTGTAATAATAGTTGGGCACCGATTGGGGTCTTCTCAAACCTTAC  
TAAAGCAATTGGGGACTGGGGTCTATATACTAGAACCTCTATAGAACTTTCAATCTCG  
TTCACACACGTGGCGGCCATCCGATATAATATT

>A\_GO\_305\_LR\_LVV\_09\_MN928612 Tomato golden vein virus (TGVV) - DNA A

ACCGGATGGCCGCGGATTTTTTAAAGTGGTCCCACTGTGAGTGACCAATCAGATTGTGTCT  
TGGACGGTTATTTATTTGAAATACTTAGGCGCTAAGTTGTTAAAGTTGTATAAATTAGACA  
TTCATAAGTGGTGCACATACTTAATTCAAAATGCCAAAGCGAGATGCCCCATGGCGTATA  
GTGGCAGGGACCACGAAAGTATCCCGCTCTTCTAATTATTCACCTCGGGGAGGTATACCA  
AGCGGGATGCTTGGGTAAACAGGCCCATGTACAGGAAGCCCAGGATATATCGTACGTTGA  
GAGGGCCTGATGTTCTAAAGGGTGTGAAGGCCATGTAAAGTTCAATCCTATGAGCAACG  
TCATGACATTTCTCATCTTGCAAGGTGATGTGTATCTCTGATGTGACACGTGGTAATGGTA  
TTACACACCGTGTGGTAAGCGTTTTTTCGTTAAGTCTGTGTACATATTGGGTAAGATATGG  
ATGGACGAAAATATTAACCTGAAGAACCATAACCAACAGTGTTATTTTTTGGTTAGTGAGGG  
ATCGTAGACCCTATGGGACACCTATGGATTTTGGTCAGGTGTTAACATGTTGATAATGAG  
CCTAGTACTGCTACGGTGAAGAACGATCTTCGTGATCGTTATCAAGTCATTCATCGATTCAA  
TGCTAAGGTTACGGGTGGACAGTATGCTAGCAACGAGCAAGCTCTTGTTCCGGCGTTTCTGG  
AAGGTCAATAATCATGTGGTTTATAATCATCAGGAAGCAGCGAAGTATGAGAATCATACGG  
AGAATGCTCTGTTATTGTATATGGCATGTACTCATGCCTCTAACCCCGTGTATGCTACATTGA  
AAATTCGGATCTATTTTTATGATTCGATTAATAATAAAATTTAAATTTTATTGAATGAT  
TTTCGAGTACAGCATTACATATGATTTGTCTGTTGCGAAACGAACAGCTCTGATTACATTA

TTAATGGAAATAACACCTAATTGGTTCAGATACAATAAAAACGAAATATCTAAATCTAGTTA  
AATATGTCATCCCAGAAGCTCTCAGGGATGTCGTCCAGACTTGGAATTTAGAAATGCCTT  
GTGGAGACCCAACGCTTCCGCAGGTTGTGGTTGAAACGTATCTGCACATGGTATATCCTGG  
TCGTTGTATAATAGGGGTCCTCGACGTTGGTTATCTTCAAATAGAGGGGATTGTAATCTCC  
CAAATAAAGACGCCATTCTCTGCTTGAGGCACAGTGATGGGTTCCGCGGTGCGTGAATCCA  
TTATTTCTACAGTTGATGTGGATGTATATGGAGCAGCCGAGTTTAGGTCTATGCGTTTACG  
CCIGGTTGTTTTCTGTTTGGCGGCTCTGTGCCGTGGCTTGATAGAGGGGGGAGTTGAGGAAG  
ATGAATTTAGCATTATGCAGTGTCCAAGCTCTTAGAGATGCATTTTCATGTTTGTCAAGGAA  
GTCTTTATAACTAGCCCCCTCTCCTGGATTGCAAAGCACGATTGATGGGATCCCTCCTTTAA  
TTTGAACCGGCTTCCGTAAGTTGCAATTGCTTTGCCAGTCACGCTGGGACCCAATTAGTTCTT  
TCCAGTGCTTCATTTTTAGATAATGCGGAGTGACATCATCAATGACGTTATACTCCACTTCA  
TTTGAATAAACTTTAGAATTAATAAATCCAAGTGTCCACTTAAATAATTATGTGGTCTTAGTGC  
ACGAGCCCACATAGTCTTCCCCGTCCTAGAATCACCTCAATGATGATACTAATAGGTCTTT  
CCGGCCGCGCAGCGGCACCCCTTCCGAAATACTCATCAGCCATTGCTGCATCTCATCAGG  
AACGTGAGTAAAGGAAGATAATTCAAATATAGGGACCCATGGGGCTGGAGCCTTTGCAA  
TATTTTTTGGACATGTGATTGTATTTATCCAAATGAAGAACATAATCTCTAGGTTGTTCTT  
TTTTAATATATTTAAGGCCTTGGATAGATTTTCTGCGTTTAGAACCCTTCGCATAAGTGTCATT  
GGCAGTTTGGCAGCCTCTCTTGTGATCTTCCATCGATCTGAAATTTCCAAAATCAATGA  
AGTCTCCGCTTTTTCCATGTAGGTCTTGACGTCCGACGAGCTTTTAGCTCCCTGAATGTTG  
GATGGAAATGTGCTGATCTTGTGGGGATACCAAGTCGAAGAATCGTTGATTCTGGCATTG  
AATTTGCCTTCGAATTGAATAAGCACATGGAGATGAGGTTCCCATCTTCGTGAAATTCTCT  
GGTTACACGAATAAATTTCTGTTTGTGGTGTTTAAGTGCCTGTAATTGGGAAAGTGTTC  
CTCTTTGGTTAATGAACAATGAGGGTATGTAAGGAAGAAATTTTTGCATTTACAGTGAAC  
GCTTTGGTGGTGGCATTGTAGTAAATAAGAAGATGAGACCCGATAGCTCTCCTTCAAACCT  
GGCGAAATGAATTGGGGAATGGGTCTCAATATATAGTAGAGTCCATTATAGAATATAATTG  
CCACGTGGCGGCCATCCGATATAATATT

>B\_GO\_305\_LR\_LVV\_09\_MN928613 Tomato golden vein virus (TGVV) - DNA B

ACCGGATGGCCGCGGATTTTTTTTTGGTGGACCCATTCTGAAAGTAATTGAGCGCATTTTT  
GACGTCCGCGAATTGAGTTGAGCGCAATATTTGAGTTCCGAAAATATAGTTAGTGGAGTAA  
CTTTAATTTGAAATAAATTACAGCTTTTAGGGTAACCAATCAGCTTGCGATTCAGGAGTCTA  
TTTTTTTAGGGTAACCAATCAGCTTGGCATTGAGGAGTCTATTTATCTATTACATTTATGTCA  
GTGTCAAGGTATACGGTATTCTTACAGTGGACCAATTAATTGTTTCGCTATGGAGTCTAACTA  
ATTAATATACGAAGTGATGATTTTTTTATATAAATTCCACATATATTGTGGTAGATATGATAT  
CGCATCATGTCTCCTACTAGCTATAGACGTGGTTGGTTCGTTTGCTCAACGACGAGGTTATTC  
TCGTAATATTTGTTCAAACGTCCTTATTATTTAAACGTACAGATGGGAAACACCGATCGG  
GTAACCTCGAATCAGGTCAATGAGGATATTAAGTTGTGCAACAGCGTATACATGAGAACCA  
GTTTGGTCCGGAATTTGTAATGGGTCATAATACAGCAATATCGACTTTTATCACTTTTCTAG  
TCTATGTAAAACCTGAACCGGGCAGATCCAGGGCATAACATTAAGTTGAAACGTTTACGTTT  
AAAGGTACCGTCAAGATTGAGCGTGTTCATGCTGATGTGACTATGGATGGTATAATACCAA  
AGATTGAAGGCGTATTTTCTATGGTTGTCGTTGTTGATCGTAAACCCATTTGAGTTCATCTG  
GTTGTCTGCATACATTTGATGAGCTCTTGGTGCACGGATCCACAGTCATGGCAATTTGGCT  
GTAACCTCAGCTTTGAAAGAGCGTTTTTACATACGTCACGTTTGAAGAAAGTAATATCTGT  
TGAGAAGGACAGTATGATGGTTGATCTTGAAGGAACGACATCGTTGAGTAATAAGCGTTTT  
AATTGTTGGTCTGCTTTTAAAGATCTTGATCGTGATTGATGTAATGGTGTTTATGCGAATATA  
AGCAAGAACGCCCTTTAGTTTATTACTGTTGGATGTCCGATACGATGTCTACGGCGTCATC

ATTTGTATCGTTCGATCTTGATTATGTTGGTTAAAAATTTAAAATATTAATGTATTTATACTTA  
CATGAGAAAATAATTCATTTAAGAAAACGTGAGAAAATAAATCATTTAACAAAACGTAAG  
AAAATAAATCATTTAAGAAAACGTAATCACATAATATAATTATAACTACTGAAATATTGGC  
TGCGCAGCTGCATGCAAAAAAAAAATATTGGCAACTTGATATTTATTTCAATGATTGGGTTG  
TGGAGGAATACAGTTAGATTTAATACATTCTTGGACTGTTGACCTAACAAAGATCGTTTAATT  
GGGCCACTGACAGCGTGATGTTGGATTGCGTTCTTTGGGCCCAATTATTGAAGCCGAATCA  
CCIGGATCTAATATGGCAGTTCCTAGCCTATTTAGATCTTTGTATGGATGTAACGCCTCCCCT  
ATGTCTGATTGGGCTTCTAATTGGGTGCTCTCTATTGTACTCCTTGTGGCCCATGACTCTCCT  
GGATTTAGTTCTATTGGGCCATGAAGCCCAAATCTAGACGTTGATGCCGATCTTATCAATTT  
TCTCTCCACTTTCCATAACCTACATGAGAGAAGTCGATGTCATTGACGGTAAATTGTTTGG  
ACATTATCTTCACTGTGGGTGCCCTGAAAGGTATATCAACCGAATGTTTTGCCGTCGATAGC  
TTCAATTTTCTTTGAATTTTGCGAAGTGGGTCATCTGATGAACGTTTGAGTCAGAACTTTA  
TAATATAGCTTCCATGGAATTGGGTCTTTGAGTGAGAAAAATGATGACGAGAAATAGTGGA  
GGTCTATGTTGCACCTGATTGAAAAGTCCATGACGCCTGTAAGGATTCATTTTCAGTCATC  
CTCTTGTGATGAATCTCCACAATTACTGATCCAGTTGCGTTGATTGGTACCTGTTGTCTATAT  
TCAATGACGCAATGATCAATCTTCATACAGCTTCGATTTAGTCTTGCACCTAATTGAGTTGCT  
TTTGATGGAAATTGCAATATGATTTAGTAAGGTCATGAGATAGTTGATATTCATCACCAGC  
AGATTCTATATAATTAAGGCGTTGGGTGGGCAAACTACTTGAGAGTCCATATGTATTAGA  
AGATTGAATAAGTGTAGAGAATAATTTAGAAAAAGTAAAGGAAACAGTAGTAGTGATAGA  
TAAGATGAGTGAATGGATGTGATATTATACAGAATTGTCGATCCTTATATAGACTCTTTACT  
GGTTATGGATAATTTGGTTAAACAATACTGAGTATACTTACTAAATAAGTTTATAAAGTTAT  
GGTGAAACGCTTTGGTGGTGGCATTGTAGTAAATAAGAAGATGAGACCCGATAGCTCTCCT  
TCAAACCTTGCCGAAATGAATTGGGAATGGGTCTCAATATATAGTAGAGTCCATTATAGAA  
TATAATTGCCACGTGGCGGCCATCCGATATAATATT

**Sample sequences without *Ty-1* NGS with codes**

>A\_GO\_169\_LR\_LVV\_14\_-\_MT214096 Tomato yellow net virus (ToYNV) - DNA A (New species #3)

ACTGGATGGCCGCGGATTTTTGGAGTCCTATGCGCTCTGGCCAGCCCATTTGAATTAAG  
ATGATATCTTTTCGCTCGACCAATGATATCGCTTCTGGGAAGCCTAGATATTTGTTCCGATAC  
TTACGGCCGAAGTTCTTGATTAACGGCTATAAATTAAGGAAGACTGGTCACAGTCTTTAAT  
TCATAATGCCTAAGCGGGACGCCCCGTGGCGCCTGATGGCGGGAACCTTCGAAGGTTAGCCG  
CTCTACGAACAGTGCCCCCTCGTGGAGGTTTGGGCCTAAGATCAACAAGGCCTCTGAATGG  
GTTAACAGGCCAATGTATAGGAAGCCCAGGATATACCGGGCTTTCAGAACTCCCGACGTT  
CTCGAGGGTGTGAAGGGCCTTGCAAGGTGCAGTCGTACGAGCAGCGACACGACGTCTCAC  
ATGTCGGCAAGGTGATGTGCATATCCGATGTGACACGTGGTAACGGCATTACCCACCGTGT  
CGGTAAGCGTTTTTGTGTTAAGTCTGTGTACATTTTAGGTAAGATATGGATGGATGAGAATA  
TCAAGCTCAAGAATCACACGAATAGTGCATGTTCTGGTTGGTCAGAGATCGTAGACCGTA  
TGGTACCCCAATGGATTTTGGGCAGGTGTTCAACATGTTTCGACAACGAGCCCAGCACTGCC  
ACGGTTAAGAACGATCTCCGCGATCGTTACCAGGTCTTGCATAAGTTCTATGCCAAGGTCA  
CCGGAGGACAGTATGCCAGCAATGAACAGGCCCTAGTCAAGAGGTTCTGGAAGGTCAACA  
ATCATGTGGTCTACAACCATCAGGAGGCTGGCAAGTATGATAACCACACGGAGAACGCTCT  
GTTACTGTATATGGCATGTACTCATGCCTCTAACCCTGTGTATGCTACTCTTAAGATCCGGAT  
CTATTTTACGATTCGGTCACGAATTAATAAAATTTGAATTTTATTGAATGATTTTCGAGTAC  
ATGGCTTACATACGATCTGTCTGTTGCGAAACGAACAGCTCTAATTACATTGTTAATTGCGA

TAACCCCTAATTGATCTAGGTACAACAGGACTAAATGTCTAAATCTATTTAAATAAGTCTTC  
CCAGAAGCTGTCAGATATGTCGTCCAGACCTGGAAATTCAAATAGGCCTTGTGGAGATGCA  
ACGCTTTCCTCAGGTTGTGGTTGAACCTTATTTGGACGTGATACTCTGGTCGTCGTAAC  
GGTAGATCCTCTACTTTGGACATCTTGAAATACAGGGGATTTATTATCTCCCAGATATAGAC  
GCCATTCTCTGCTTGATGTGCAGTGATGAGTTCCCCTGTGCGTGAATCCATGACCTGTACAA  
TTGAGGTGCTGATATATGGTACAGCCGAGTCTAAGTCAACTCGTCGTCGCCGGACGGCTCT  
CTTCTTCGCAATCCTGTGTTTTCGTTTTGATAGAGGGGGCGTCGAGGAAGATGAATTTAGCA  
TTGTGAAGTGTCCAGGCTTTTAGTGATGCATTTTCTCTCTCTCGAGGAATGCTTTATACTG  
GCCCCCTCGCCAGGATTGCAGAGCACGATTGATGGAATTCCTCCTTTAATTTGAACTGGCTT  
ACCGTACTTACAATTTGACTGCCAGTCTTTTTGAGCACCAATCAATTCCTTCCAGTGCTTTAG  
CTTTAGATAATGCGGGGTGACATCATCGATGACGTTATACTCAACATCGTTTGAGTAAACCC  
TAGAATTGAAGTCCAGATGTCCACTTAAATAATTATGTGGGCCTAATGCACGAGCCACAT  
CGTCTTCCCTGTCCTAGAGTCACCCTCCACTATGATACTAACAGGTCTCTCCGGCCGCGCAG  
CGAACCTCTACCAAATAATCGTCAGCCATTCTGCATCTCGTCGGGAACGTTAGTGAA  
GGAGGAGAGGGGAAACGGAGGAGCCCATGGATCTGGAGCCTTTTTGAACAGCCGATCTAT  
GTTAGCCTTGATGTTATGATAATCACGATGAACGTCTTTGGGTCTCCTGCCCTGATAATGTC  
AATAGCCTCTCCGACAGTAGGTGCATTGATGGCGTTGTGGTAGACGTCGCTTTATTTGTCTT  
TGTTCCGCCAGACACCTTGTACTGTCCGGATTCACAATAATCACCTCTTTGGTGATATAATT  
CTTGACGGCGTTGGTGTCTTTGGCTGTCTGAACATTTGGGTGAAAACGGGCAGACCTTCTGG  
GGTGAGTGAGGTCGAAAAATCTAACATCCTTGATGTTTCGACTTTCCTGAGAGTTGTATGAGA  
CAGTGGAGATGGGGATGCCCGTCTGAATGTTCTCTCTGGCGACTCTGATATATGTCGGTGT  
GACGACCGACCACGATAGTCCGAGAAGCATTGGAAGAGCTTCATCTTTTGAATATCGCAC  
TGGGGATATGTTAAGAATATATTTCTAGCTTGTAATCTAAATGATTTGGGGTTTCGTGGCATT  
TTTGTAATAAGATAGGGGACTCCAGGGGTTGAGCTCTCAACTTCTATGTCCTATTTGCTGG  
AGTCTGGAGTCTATATATACTAGAAGGCTAAAATCCTCTTCCAGGACTCCAAGTGGTACG  
GACGGGACTCCAGGGGGCAAAGCGGCCATCCACTTAATATT

>B\_DF\_667\_LR\_LVV\_22\_-\_MT214085 Tomato severe rugose virus (ToSRV) - DNA B

ACCGGATGGCCGCGGATTTTTCTTATCTGCTACGTGGCGAAATCGTGTACGTTGCCTCGCG  
CTTTCATTTAATTGAGCGCTTTTTTGAAGTCCGCGAAATGAGTTAATTGCTTTTTNAAAT  
CCGCTNTTTGTGAATCACCTTTAATTTGAATTAAGGTTGGATAGTTCATATTGATCAATCAT  
TTCGCTGGTTTATTTCNTGTCGTGGTGTAAATACAACCGTTCGTTAAAAATATAAGAAATTTA  
CGACGTGGACTGTCTAAATTCATCTACATAGTTAATTTGACAAATGAATGCATATTTAAAC  
TCTGCTTTCGTGTGGGTTTACACCACGTCTATACATATTGTCCAGGTTATTTTGTATAAGTAT  
AATTTTTATTTGCTTATCTTATTATATGAACATGTATCCCATTAAGTATAGACGTGGAATG  
TTGTTAATCATCGACGAGGTTACTCATCTAATCCCGTATTTAAGCGTTTACACGGAGCGAA  
ACGAAGTGATTTCAAGCGTCGTTTCGAGTAATCAGATTAAGAGCATGGATGAGACTAAAATG  
TCTGTTTCAGCGGATTCATGAGAACCAGTTTGGCCCTGAATTTGTAATTGGCCACAATTCTGC  
CATATCCACATTCATTACATTCCTACTCTTTGTAAGACTGTCCCGAACCGTTGTAGGTCATA  
CATAAAGTTAAGACGACTACGTTTTAAAGGAACAATCAAGATTGACCGTGTTTCATGCTGAG  
GTGAATATGGACGGTACAAGTCCAATGATTGAAGGAGTCTTCTCTCTGGTTGTAGTCGTTGA  
TCGCAAACCTCATTGGGCTCATCTGGAACCTCTGCATTCTTTTGTAGATATTTGGTGCAA  
GGATTCATAGCCATGGTAACCTGGCAATAGTATCCTCTCTGAAAGAGCGTTTTTACATACGT  
CACGTTTGAAGAAAGTAATATCTGTTGAGAAGGATACAACCATGGTTGATGTTGAAGGAA  
GTACTATTTTATCTAACAGGCGTTTTAATTGTTGGTCATCCTTTAAGGATATTGACCGTGAAT  
CATGTAATGGTGTATGCAAACATAAGCAAGAACGCCCTGTAGTTTATTACTGTTGGATG

TCTGATAATGTGTCTAAGGCATCGACATTTGTATCATTTGACCTTGATTATGTTGGCTAAATA  
GTAAGTGTAAATACGTGATTAGTAATAATGTTTAACTCGCTGTAATAATAAATACAAGTACTT  
GTTTCAGTAATAATGTTCAACTCGCAGTAATAACAAAAAATGTGTTAATAATATAGAATTT  
ATTTTAAAGATTTTGGCTGTGAAGGAGTACAGTTGCTGTTTATACATTCATGGGCCGCTGCTT  
TAACAAGTTCGTTTAAATTGGGCCATTGACAGTGTTATGTTTCGATTGGGCCCTTTGAGACCA  
ATTACGGACGCAGAATCACCTGGGTCTAATGTGCCTGTACCCAGTCTATGTAATTGTCTGTA  
TGGATGCATCGCGTTCTCTATATCTGAGCCCGCCTCTGATGGGCTTAAGCCTACAGTACTTC  
TAACAGCCCATGACTCTCCGGGCATTATTTCAAGTGGGTTGTGAAGGCCAATCTTGATATT  
GAGGCGGATCTGATCATCTTCCTTTCCATTTGCCATAGCCTACGTGACTGAAATCAATGTC  
CTTATCTGTAAATTGTTTTGAAAGGATCTTCACCGTTGGGGCACGGAAAGGTATATCAACCG  
AATGTTTAGCCGTCGAGAGTTTCAGTCTCCCTTTGAATTTAGCGAAGTGGTACTCTGGTGA  
ACGTTTCGTGTCACATACTCTGTAGTACAATTTCCATGGAATTGGGTCCTTAAGGGAGAAGA  
ACGACGACGAAAAGTAGTGAAGATCTATGTTACATCTGATAGGAAAGGTCCACGACGCCT  
GTAGTGATTCATTGTCCGTCATTCTTCTGTCATGAATTTGACTATAACTGAACCTACGGCGT  
TAATTGGTACCTGTTGTCTGTATTCTATTACGCAATGGTCGATTTTCATACAGCTACGACTAA  
GCCTTGCGCTTAATTGAGACGCCGTTGAAGGGAATTGAAGCATTATCTCGGTTAGATCATGG  
GAAAGCTGATATTCATCACGCTTAGATTCTATATAATTAATGCGTTGGGAGGATTCACAA  
GCTGAGATTCCATTATTGAAAATAGGGAGCGCAGCGACAATGTTTGAGGAAAGTTAATAA  
GGGAAGATGATAATATTTTCGTCAACTGAATATATGACAAGAAAATTGTCTGTTGATCCAA  
TTGGGAAATTGGAGATGATAATAACTAAAAACGAGGAATCAGGAGACGACGAATTGAG  
AGGAGATATTGTCTATTTTAGGTGTAATTGATAAATACCCCTCTATTTGCTCTTTAAATAGAA  
TTTTCAAGGCAAGGGCGCTTTGGAGCTGATGGCATATTTGTAAATATGACCCTTACTACCAA  
ATGGTAGCTGCTCTAAACTCATATGAATTGGTAGTTATGGTAGCTCTTATATAGTAGAAGT  
TCTTTTTAAGGAGATTGCTACACGTGGCGGCCATCCGTTATAATATT

>A\_DF\_667\_LR\_LVV\_22\_-\_MT214084 Tomato severe rugose virus (ToSRV) - DNA A

ACCGGATGGCCGCGGATTTTTACCCCTTTAGTTTCAATTAAGTAAAGTGATTGTCTGTG  
GCCCAATCATATTGGGCCGTGTCGAGCTTAGATATTTGTAACAACCTAAGGCCCAAGTTGTTA  
AACGGCTATAAATTGAACATACACTTTACTTTTGTCTTAATTCAAATGCCTAAGCGTGATG  
CCCATGGCGTTTAAACGGCGGGAACCTCAAAGGTTTCCCGCTCTGTCAATTATTCTCCCCGT  
GCAGGATATGGACCCAAATATAACAAGGCCGCTGAGTGGGTGAACAGGCCCATGTACAGG  
AAGCCCAGGATCTACCGTACTTTGAGAGGCCCAGATGTTCTAGAGGCTGTGAAGGGCCTT  
GTAAGGTTACGCTTACGAGTCTCGTCATGATGTTCCCATGTCGGGAAGGTGATTTGTGTG  
TCTGACGTTACACGTGGTAACGGTATTACTACCGTGTTGGTAAGCGTTTCTGCGTGAAGTC  
TGTATATATTTTAGGGAAGGTATGGATGGACGAGAGCATCAAGTTGAAGAATCACACAAAT  
AGTGTGATGTTCTGGTTGGTTAGAGATCGGAGACCTTATTCGACACCTATGGATTTTGGCCA  
GGTGTCAACATGTTTGACAACGAGCCTAGCACTGCAACTGTTAAGAACGATCTTCGGGAT  
CGTTTTCAAGTCATGCACAAGTTTTATGCCAAGGTTACTGGTGGACAGTATGCCAGTAATGA  
GCAGGCATTAGTGAAGCGCTTTTGAAGGTCAACAACAACGTAGTCTACAACCATCAGGA  
GGCAGGGAATAACGAGAATCATACTGAGAACGCCTTGCTATTGTATATGGCATGTACTION  
GCCTCTAACCCCGTGATGCTACATTGAAAATTCGGATCTATTTTTATGATTCGATTACTAAT  
TAATAAAATTTAAATTTTATTGAATGATTTTCGAGTACAGCATTACATATGATTTGTCTGTT  
GCGAAACGAACAGCTCTGATTACATTATTAATGGAATAACGCCTAATCGATCTAGATACA  
ATAAGACTAAATATTTAAATCTAGTTAAATATGTCGTCGCCAGAAGCTGTCAGTGAAGTCGT  
CCATATCTGGAAGTTGAGGAAGCTCTTGTGGAGATGCAATGCTCTCCTCAGGTTGTGGTTGA  
ACCGTATTTGGACGTGGTAGACTCTGCTCGCGGTGTACATTGGATCCTCCACTCTGTTTATCT

TGAAATAGAGGGGATTTGATATCTCCCAAATATACACGCCATTCTCTGCCTGATGTGCAGTG  
ATGAGTTCCCCTGTGCGTGAATCCATGTCCAGCGCAATCTATGTGTACGAAAATGGAGCAG  
CCGCACTGTAATCAATTCGTCTTCTTCGTATAGCTCTCCTCTTAGCAGCCCGATGTTGAACT  
TTGATAGAGGGGGGAGTTGAGGAAGATGAATTGTGCATTGTGCTTTGTCCAACACTTAATG  
CTGAGTTCTCCTCTTTGTCGAGGAAACATTTATAGCTGGCCCCCTCGCCAGGATTGCAAAGC  
ACGATGCATGGGATACCACCTTTAATTTGAACTGGCTTTCCGTATTTACAGTTTGATTGCCA  
ATCCTTTTGGGCCCAATCAATTCCTTTCCAGTGCTTTAACTTTAGATAGTGCGGTGCGATGTC  
ATCAATGACGTTATATTCAACATGATTTGAATAAACCCCTAGGATTGAAATCTAGGTGTCCAC  
TCAAATAATTATGGGCCCTAATGCACGTGCCACATCGTCTTTCCCGTTGAGAATCACCT  
TCAATGATGATACTAATAGGTCGTTCCGGCCGCGCAGCGGCACCTCTCCAAAATAGTCAT  
CTGCCAAAGCTTGCATCTCTCTCGGTACGCTAGTGAAAGAGGAGAGGGGAAACGTAGGGG  
CCCATGGCTCCGGAGCCCTTGAAATATCCTATCTAAATTAATTTAGATTGTGAAACTGA  
AATAAGAACTTTTCAGGCAGCTTCTCACGGATTATCTGCAAGGCGACGTCTTTGGAAGGTG  
CGTTCAAGGCTTCTGCGGCAGCGTCGTTAGCTGTCTGGCAACCCGCTCTAGCACTTCTCCG  
TCGATTTGGAATCCCCCACTCGATAGTATCTCCGTCCTTGTCGACATAGGATTTGACGTC  
GGACGATGACTTAGCTCTCTGAATGTTCCGATGGAAATGTGTTGACCTTGTGGGGAGACC  
AGGTCGAAGAATCGTTGATTTTGGCAGCAGTAGTTGCCCTCAAATTGAAGAAGCACGTGGA  
GATGAGGCTCCCCATTTTCATGGAGCTCTCTGCAAACCTTGATGAACTTCTTATTTGTAGGA  
GTGTTTAGGGTTTTTAATTGGGAAAGTGCTTCTTCTTTTCGATAATGAGCATTGGGGATATGIG  
AGGAAATAATTCTTCGCTTTTATTTGAAAGCGCTTTGGAGCTGATGGCATATTTGTAAATAT  
GACCCTTACTACCAAATGGTAGCTGCTCTAAAACCTCATATGAATTGGTAGTTATGGTAGCTC  
TTATATAGTAGAAGTTCTTTCTAAGGAGATTGCTACACGTGGCGGCCATCCGTTATAATATT

>B\_GO\_118\_LR\_LVV\_21\_-\_MT214091 Tomato rugose mosaic virus (ToRMV) - DNA B

ACCGGATGGCCGCGGATTTTTCTTATCTGCTACGTGGCGAAATCGTGTACGTTGCCTCGCG  
CTTTCCATTTAATTGAGCGCTTTTTTGAAGTCCGCGAAATGAGTTAATTGCTTTTTNAAAT  
CCGCTNNTTGTGAATCACCTTTAATTTGAATTAAGGTTGGATAGTTCATATTGATCAATCAT  
TTCGCTGGTTTATTCNTGTCGTGGTGTAATTACAACCGTTCGTTAAAAATATAAGAAATTA  
CGACGTGGACTGTCTAAATTTTCATCTACATAGTTAATTTGACAAATGAATGCATATTTAAAC  
TCTGCTTTCGTGTGGGTTTACACCACGTCTATACATATTGTCCAGGTTATTTTGTATAAGTAT  
AATTTTTATTTGTCTTATCTTATTATATGAACATGTATCCCATTAAGTATAGACGTGGAATG  
TTGTTAATCATCGACGAGGTTACTCATCTAATCCCGTATTTAAGCGTTTACACGGAGCGAA  
ACGAAGTGATTTCAAGCGTCGTTGAGTAATCAGATTAAGAGCATGGATGAGACTAAAATG  
TCTGTTACGCGGATTCATGAGAACCAGTTTGGCCCTGAATTTGTAATTGGCCACAATTCTGC  
CATATCCACATTCATTACATTCCTACTCTTTGTAAGACTGTCCCGAACCGTTGTAGGTCATA  
CATAAAGTTAAGACGACTACGTTTTAAAGGAACAATCAAGATTGACCGTGTTTCATGCTGAG  
GTGAATATGGACGGTACAAGTCCAATGATTGAAGGAGTCTTCTCTCTGGTTGTAGTCGTTGA  
TCGCAAACCTCATTTGGGCTCATCTGGAACCTCTGCATTCTTTTGTGATGAGATATTTGGTGCAA  
GGATTCATAGCCATGGTAACCTGGCAATAGTATCCTCTCTGAAAGAGCGTTTTTACATACGT  
CACGTTTGGAAAGAAAGTAATATCTGTTGAGAAGGATACAACCATGGTTGATGTTGAAGGAA  
GTAATTTTTATCTAACAGGCGTTTTAATTGTTGGTCATCCTTTAAGGATATTGACCGTGAAT  
CATGTAATGGTGTTTATGCAAACATAAGCAAGAACGCCCTGTAGTTTATTACTGTTGGATG  
TCTGATAATGTGTCTAAGGCATCGACATTTGTATCATTTGACCTTGATTATGTTGGCTAAATA  
GTAAGTGTAATACGTGATTAGTAATAATGTTTAACTCGCTGTAATAATAAATAACAAGTACTT  
GTTTCAGTAATAATGTTCAACTCGCAGTAATAACAAAAAATGTGTTTAATAATATAGAATTT  
ATTTTAAAGATTTTGGCTGTGAAGGAGTACAGTTGCTGTTTATACATTCATGGGCCGCTGCTT

TAACAAGTTCGTTTAATTGGGCCATTGACAGTGTTATGTTTCGATTGGGCCCTTTGAGCACCA  
ATTACGGACGCAGAATCACCTGGGTCTAATGTGCCTGTACCCAGTCTATGTAATTGTCTGTA  
TGGATGCATCGCGTTCTCTATATCTGAGCCCGCCTCTGATGGGCTTAAGCCTACAGTACTTC  
TAACAGCCCATGACTCTCCGGGCATTATTTCAAGTGGGTGTGAAGGCCAATCTTGATATT  
GAGGCGGATCTGATCATCTTCCTTTCCATTTGCCATAGCCTACGTGACTGAAATCAATGTC  
CTTATCTGTAAATTGTTTTGAAAGGATCTTCACCGTTGGGGCACGGAAAGGTATATCAACCG  
AATGTTTAGCCGTCGAGAGTTTCAGTCTCCCTTTGAATTTAGCGAAGTGGTACTCTGGTGA  
ACGTTTCGTGTACATACTCTGTAGTACAATTTCCATGGAATTGGGTCCTTAAGGGAGAAGA  
ACGACGACGAAAAGTAGTGAAGATCTATGTTACATCTGATAGGAAAGGTCCACGACGCCT  
GTAGTGATTCATTGTCCGTCATTCTTCTGTCATGAATTTGACTATAACTGAACTACGGCGT  
TAATTGGTACCTGTTGTCTGTATTCTATTACGCAATGGTCGATTTTCATACAGCTACGACTAA  
GCCTTGGCGCTTAATTGAGACGCCGTTGAAGGGAATTGAAGCATTATCTCGGTTAGATCATGG  
GAAAGCTGATAATTCATCACGCTTAGATTCTATATAATTAATGCGTTGGGAGGATTCACAA  
GCTGAGATTCCATTATTGAAAATAGGGAGCGCAGCGACAATGTTTGAGGAAAGTTAATAA  
GGGAAGATGATAATTTTTCGTCAACTGAATATATGACAAGAAAATTGTCTGTTGATCCAA  
TTGGGAAATTGGAGATGATAATAACTAAAAACGAGGAATCAGGAGACGACGAATTGAG  
AGGAGATATTGCTATTTTTAGGTGAATTGATAAATACCCCTCTATTTGCTCTTTAAATAGAA  
TTTTCAAGCAAGGGCGCTTTGGAGCTGATGGCATATTTGTAATATGACCCTTACTACCAA  
ATGGTAGCTGCTCTAAACTCATATGAATTGGTAGTTATGGTAGCTCTTATATAGTAGAAGT  
TCTTTTTAAGGAGATTGCTACACGTGGCGGCCATCCGTTATAATATT

>A\_GO\_118\_LR\_LVV\_21\_-\_MT214090 Tomato rugose mosaic virus (ToRMV) - DNA A

ACCGGATGGCCGCGGATTTTTTTAAGGCCATTTATTTTGGGCCTCTCTTTTGGGCCTTCAC  
CTTTAATTTTAAATGAAAGTAATTTTGACCCAATCATGATGCATTTGACGAGCTAAGATATTT  
AGAACTACTTAACGCCCAAGTTGCATAACGGCTATAAATTAACGTACATATGTCGATAGC  
TTTAATTCAAAATGCCTAAGCGCGATGCCCATGGCGCCACATGGCTAGTACATCTAAGAT  
TAGCCGGGGCGTTAATAATTCTCCACGTGCAGGAGTTGGGCCACGGTCCAACAAGGCCACT  
GACTGGGTAAACAGGCCCATGTACAGGAAGCCCAAGATATATCGGATGTATAGAACCCCC  
GATGTTCCAAGGGGTTGTGAAGGCCATGTAAAGTGCAGTCGTTTGAACAGCGTCACGATA  
TCTCCATACTGGTAAGGTGATGTGCGTCTCCGATGTGACACGTGGTAACGGTATTACACAC  
CGTGTGGGTAAGCGTTTCTGTGTTAAGTCTGTGTATATTCTGGGTAAGATATGGATGGATGA  
GAACATCAAGTTGAAGAACCACACGAACAGTGCCATGTTCTGGTTGGTCAGGGACCGTAG  
ACCTTATGGTACCCCTATGGACTTTGGCCAGGTGTTTAAACATGTTTCGACAACGAGCCTAGCA  
CCGCCACTGTGAAAACGATCTCCGTGATCGTTTTCAAGTCATGCATAAGTTCTATGCTAAG  
GTCACAGGTGGACAATACGCAAGCAACGAGCAGGCGCTTGCAAGCGGTTCTGGAAGGTC  
AACAAATCATGTCGTCTACAACCATCAAGAAGCTGGAAAATACGAGAATCATAACGGAGAAC  
GCCCTATTATTGTATATGGCATGTACTCATGCCTCAAACCCCGTGTACGCAACTTTAAAAAT  
TCGGATCTATTTTTATGATTCGATAACAAATTAATAAATTTTTGAATTTTATTGAATGATTCTC  
GAGTACAGCATTTACATATCGTCTGTCTGTTGCGAAGCGAACAGCTCTAATTACATTATTAA  
CTGAAATAACGCCTAGCTGATCTATGTACAACATAAGTAAATATTTAAATCTATTTAAATAT  
GTCATCCCAGAAGCTCTCAGGGATGTCGTCCAGATTTGGAAGTTGAGATAAGCCTTGTGGA  
GACCCAGTACTCTCCTCAGGTTGTGGTTGAACCGTATTTGGACGTGGTAGACTCTGGTCCTC  
GTGTATAGTATGTCCTCGACGTTGTACATCTTGAATAAAGGGGATTTGATATTTCCCAAGT  
ATACACGCCATTCTCTGCCTGATGTGAGTGTGAGTTCCTTGTGCGTGAATCCATGTCCA  
GCGCAATCTATGTGTACGAAAATGGAGCAGCCGCACTGTAAATCAATTCGTCTTCTTCGTAT  
AGCTCTCCTCTTAGCAGCCCGATGTTGAACTTTGATAGAGGGGGGAGTTGAGGAAGATGAA



TTGTGCATTGTGCTTTGTCCAACACTTAATGCTGAGTTCTCCTCTTTGTCGAGGAAACATTT  
ATAGCTGGCCCCCTCGCCAGGATTGCAAAGCACGATGCATGGGATACCACCTTTAATTTGA  
ACTGGCTTTCCGTATTTACAGTTTGATTGCCAATCCCTTTGGGCCCCAATCAATTCTTTCCAG  
TGCTTTAACTTTAGATAGTGCGGTGCGACATCATCAATGACGTTATATTCAACATGATTTGA  
ATAAACCTAGGATTGAAATCTAGGTGTCCACTCAAATAATTATGGGCCCTAATGCACGT  
GCCACATCGTCTTTCCCGTTTCGAGAATCACCTTCAATGATGATACTAATAGGTTCGTTCCGG  
CCGCGCAGCGGCACCTCTCCCAAATAGTCATCTGCCCAAGCTTGCATCTCTCTCGGTACGC  
TAGTGAAAGAGGAGAGGGGAAACGTAGGGGCCCATGGCTCCGGAGCCCTTGAAATATCC  
TATCTAAATTACTATTTAGATTGTGAAACTGAAATAAGAACTTTTCAGGCAGCTTCTCACGG  
ATTATCTGCAAGGCGACGTCTTTGGAAGGTGCGTTCAAGGCTTCTGCGGCAGCGTCGTTAGC  
TGTCTGGCAACCGCCTCTAGCACTTCTCCGTCGATTTGGAATCCCCCCTCGATAGTATC  
TCCGTCCTTGTGACATAGGATTTGACGTCCGACGATGACTTAGCTCTCTGAATGTTCCGAT  
GGAAATGTGTTGACCTTGTGGGGAGACCAGGTCAAGAATCGTTGATTTTGGCAGCAGTA  
GTTGCCCTCAAATTGAAGAAGCACGTGGAGATGAGGCTCCCCATTTTCATGGAGCTCTCTG  
CAAACCTTGATGAACTTCTTATTTGTAGGAGTGTTTAGGGTTTTTAATTGGGAAAGTGCTTCT  
TCTTTGATAATGAGCATTGTTGGATATGTGAGGAAATAATTCTTCGCTTTTATTTGAAAGCG  
CTTTGGAGCTGATGGCATAATTTGAAATATGACCCTTACTACCAAATGGTAGCTGCTCTAAA  
ACTCATATGAATTGGTAGTTATGGTAGCTCTTATATAGTAGAAGTTCTTTCTAAGGAGATTG  
CTACACGTGGCGGCCATCCGTTATAATATT

>A\_GO\_384\_LR\_LVV\_19\_-\_MT214088 Tomato mottle leaf curl virus (ToMoLCV) - DNA A

ACCGGATGGCCGCGCGGGTTTTTTTTGACCCGCTCCGTGACGTGTTTTTTGTCTTTTACTATGT  
GGTCCAGTCAATAAATGACAAATATGACCGTCCAATCAGAAATGGTCCCTCAAAGCCTAATT  
ATTTAAAATACTTGGTCACTAAGTTTGGTAAAGTTTATAAATGGTCCCTCCTCGTAATGTTA  
TACCAACTTTAAGTCATAATGCCTAAGCGTGATGCCCCATGGCGCTCAATGGCGGGGACCT  
CAAAGGTTAGCCGCTCTGCAAATTTCTCCCCTCGTGGAGGAATCGGGTCGAAATCAGAGAA  
GGCCCAGGCCTGGGTTAACAGGCCCATGTACAGGAAGCCCAGGATATATCGGATGTATAG  
AACCCCGGATGTTCCAAGGGGTTGTGAAGGCCCATGTAAAGTCCAATCGTTGAACAGCGT  
CACGATGTCTCTCATACTGGGAAGGTGATGTGTATTTCCGATGTCACTCGTGGTAACGGTAT  
TACCCACCGCGTGGGTAAACGTTTTTGTGTCAAGTCTGTGTATATATTAGGCAAGGTCTGGA  
TGGATGACAACATCAAGTTGAAGAACCACACGAATAGTGTGATGTTCTGGTTAGTTAGGGA  
CAGGAGACCGTATGGCACTCCCATGGATTTTGGCCAGGTGTTCAACATGTTTGACAACGAG  
CCCAGTACTGCCACGGTGAAGAACGATCTCCGCGATCGTTACCAGGTCCCTGCACAAGTTCT  
ATGCTAAGGTCACAGGTGGACAATACGCAAGCAACGAGCAGGCGCTTGTCAAGCGTTCT  
GGAAGGTCAACAATCATGTCGTCTACAACCATCAAGAAGCTGGAAAATACGAGAATCATA  
CGGAGAACGCCCTATTATTGTATATGGCATGTACTCATGCCTCTAACCCCGTGTATGCTACT  
TAAAAAATTCGGATCTATTTTTATGATTTCGATAACAAATTAATAAATTTTAAATTTTATTGAA  
TGATTTTCGAGTACAGCATTTACATATGGTTTGTCTGTTGCGAAACGAACAGCTCTAATTAC  
ATTATTAATTGAAATAACTCCTAAACGATCTAAATACATATTAATAAATCCCTAAACCTAT  
TAAATAAGTTCGTCAGGAGCTGTGCTGACGTCGTCGACTTGGAAAGTTCAGGAAGCA  
CTTTTGGAGATCCAATGCTCTCCTGAGGTTGTGGTTGAACCGTATCTGGATGTGGTAGATCC  
TTGTGTTTCGTGTATATTGGATTCTCTACGTTTGTATCTTGAAATAGAGGGGATTTGGGACCT  
CCCAGATAAACGCGCCATTCTGTGCCTGATGTGCAGTGATGACTTCCCCGGTTCGTTGAATCC  
ATTGCCGACGCAGTCGATGTGTTGGTATATGGTGCAGCCACAGTTTAGGTCTATGCGCTTGC  
GTCGAATGACCCTCTTTTTAGCTATCCGTGCTGTGGTTTTATAGAGGGGGGTGTTGAGGAA  
GATGAATTTGCATTGTGCAGTGTCCAGTTTCTGAGGGCTGTGTTTTCTTGTCTTTTCGAGAAA

CTCTTTATAGCTGGCCCCCTCTCCTGGATTACAGAGCACGATTGAGGGTATCCCTCCTTTAAT  
TTGAACTGGCTTTCCGTATTTGCAGTTTGATTGCCAGTCCTTTTGGGCCCTATGAGCTCTTTC  
CAATGCTTCATCTTTAGATATTGCGGAGTGACGTCATCAATGACGTTGTACTCAGCTTCGTTT  
GAGTAAACCCTAGAATTGAAATCCAAGTGTCCACTCAAATAGTTATGTGGGCCTAGTGCAC  
GAGCCCACATCGTCTTCCCCGTCTCGAATCACCTCGATGATTATACTAATAGGTCTCTCC  
GGCCGCGCAGCGGGATCCACACCAAATAATCATCCGCCACTCTTGCATCTCCTCCGGAA  
CCTCAGTAAAGGAGGAGAGGGGAAACGGAGGAACCCATGGTTCCGGAGCATTCTGAAAG  
ATACGTTCTAAATTAGAACGTATGTTGTGATGTTGTAGGACGAAGTCCTTCGGTTGCTCCTC  
CCTCAATATATTGAGGGCCTCCATGACGGATCCTGCGTTGAGGACCTTGGCATACTGTCGT  
TGGCAGATTGCTGACCTCCTCTAGCTGATCTGCCATCGATCTGGAAAACCTCCATGATCAATG  
AAGTCTCCGTCTTTCTCCACGTAGGATTTGACATCTGACGAGCTCTTAGCTCCCTGTATGTTT  
GGATGGAAATGTGCTGACCTACTTGGGGAGACGAGGTGGAAGAACTTGTGTTTTTGCAGC  
TGTATTTACCTTCGAATTGGATGAGCACGTGGAGATGAGGTTGCCATCTTCGTGTAGTTCT  
CTCGAGACACGAATGAACAATTTATTAGTTGGTGTGTTTAGGGCTAATAATTGGGAAAGTG  
CTTCTTCTTTGGAAAGAGAACACTGTGGATAAGTGAGGAAATAATTTCTAGCATTAACTA  
AATGGCTTAGGCGGTGGCATATTTGTAATAATAGTTGGGCACCGATTGGTGTCTTCTCAAC  
TACTAAAGCAATTGGGGACTGGGGTCTTATATATACTAGAACCCTCTATAGAACTTTCAAT  
CTCGTTCACACACGTGGCGGCCATCCGTATAATATT

>A\_MG\_378\_LR\_LVV\_15\_-\_MT214095 Tomato golden net virus (ToGNV) - DNA A (New species  
#2)

ACTGGATGGCCGCGATTTTTTCCCCGCTCCTGACCCGCTCCGCAAATCTGGGCCGCAAATC  
TGGGTCTACTAATAATGACAAATTTGACTGACCAATCAGATATCGTCTCCTCGGAGCTTATTT  
ATTTTGGAAACTCCGGCGCGAATTTGTTATATAAAGGGCCATGTTAACATGGCCCAATAA  
GCTTTTTCGGAAATGCCGAAGCGGTATGCCCCATTCCGCACAATGGCGGGAACCTCGAAGA  
TATCCCGCACGTCCAATATGTCTCCGCGTGGTGGTATCCGGCCCAAATTCGACAAGGGCTCT  
GAGTGGGTCAACAGGCCCATGTACAGGAAACCCAGGATATAACCGTACTTTACGCAGCCCA  
GACGTGCCCAGGGGTTGCGAGGGGCCTTGTAAAGTCCAGTCTTTTGAACAGCGTCATGATG  
TGTCTCATAACGGGCAAGGTGTTGTGTGTCTCTGATGTGACACGGGGTAATGGTATTACCCAC  
CGTGTCCGTAAGCGTTTTTGTGTTAAGTCTGTGTATATATTAGGGAAGGTGTGGATGGACGA  
TAATATTAAGTTGAAGAACCATAACGAATAGCGTATTGTTTTGGTTAGTTAGGGATAGGAGG  
CCGTATGGTAACCCTATGGACTTCGGCCAGGTTTTCAATCTGTATGATAATGAGCCCAGTAC  
CGTACTGTGAAGAACGATCTCCGTGATCGTTTTTCCAGGTTTTGCACAAGTTCTCCGCCAAGG  
TCACGGGTGGTCAAGTATGCCAGTAACGAGCAGGCTATTGTGCGGCGTTTTTGGAAAGGTCTA  
CAACCACGTGGTCTACAACCACCAAGAGACCGGAAGTACGAGAATCACACGGAGAACG  
CCCTGTTATTGTATATGGCATGTACGCATGCCTCCAACCCTGTGTATGCTACCCTTAAGATTC  
GGATCTATTTTTATGATTCGGTCTTAAATTAATAAATATTAATTTTTATTGAATGGTCTTCGA  
GTACATAATTTACATACGATTTGTCTGTTGCGAAACGAACAGCTCTAATTACATTGTTAATG  
GAAATAACGCCTAATCGATCTAGATAACAATAAGACTAAATATTTAAATCTAGTTAAATATG  
TCGTCCCAGAAGCTGTCAGTGAAGTTCATATCTGGAAGTTGAGGAAGCTCTTGTGGAG  
ATGCAATGCTCTCCTCAGGTTGTGGTTGAACCGTATTTGGATGTGGTACACTCTTGTGTTTGC  
GTGGAGTAAAACCTCCACGTTTGTATCTTGAAATAAAGGGGATTGTGCACCTCCAGGTAT  
AGACGCCATTCTCCGCTTGACGTCGCGTGATGCGTTCCTCTGTGCGTGAATCCATGTCTCG  
GCAGTCTATGTGCATGTATATCGAGCAACCGCACTGTAAGTCAATGCGTCTCCTCCTGATGG  
CCCTGCTATTCTTCTTAGCTATCCGTGCTGTGGTTTTATAGAGGGGGGTGTCGAGGAAGAT  
GAATTTTGCATTGTGGAGTGTCCAGTTTTTGGAGGCTGTGTTTTCTCTTTGTGAGAAAATC

TTTATAGCTGGCCCCCTCTCCTGGATTACAGAGCACGATTGAGGGTATCCCTCCTTAATTG  
AACCGGCTTTCCGTA CTTGCAATTTGATTGCCAGTCCCTTTGGGCCCCAATTAATTCTTTCCA  
GTGCTTTAACTTTAGATAGTGCGGTGCGACATCATCAATGACGTTATACTCCACTTCGTTG  
AGTAAACCCTAGGATTGAAATCCAGGTGTCCACTCAAATAATTATGTGGCCTAATGCACG  
CGCCACATTGTCTTCCCCGTCCTCGAATCACCTCCACGATGATTGAAACCGGTCTGAAAC  
TACTATGAAAATCTGGCCGCGCAGCGGAAAGACGACCAAATAATCATCAGCCCCTCCT  
GCATCTCATCGGGAACGTTAGTGAAGGAGGAGAGTGAAAACGGAGGAGCCCATGGCTCTG  
GAGACTTAGCGAATATCTTCTGAATATTCGCATTGATGTTGTGATGTTGAACTATGAAGGCC  
TTCGGGTCTCCTGTCCGATAATTGCAAGAGCCTCTGATGCAGATCTTGCATTGATGGCGTT  
GTGATAGACGTCGTCTTTGTTGGTCTTAGTTCCGCCAGACACCTTGTATTGTCCGGATTACA  
ATAATCACCTCCTTGGTGTATGTAATCTTGACGGCATTGGAGTCTTTGGCTGCCTGTACATT  
TGGGTGAAAATTGGTAGACCTTCTTGGGTGAGTAAGGTCGAAAATCTAGCATCCTTGATG  
TTTGA CTTACTGGATAGTTGTATGAGGCAGTGGAGGTGGGGGTGTCGGTCCGAGTGTTCCCTC  
TCTGGCGACCCTAATGTATGTAGGGGTGACGACTGACCATTTAAGGTTTTGAAGCATCTGA  
AGA ACTTCATCTTTCGTGATATCACACTGGGGATATGTGAGGAAGATGTTCTTTCGAGCAAG  
TCTGAACGAATTCTGATTACGGGGCATGTTGTTAAATATATATTTGTGAACAGTTGAGGACA  
CCAGGCTTTGCTCTCAACTTCTGTGCTATTTGTTGGTGTCTGGTGTCCCATTTATACTAAAA  
GCCTCTATGAATCTCTTAGGACACCAGGGGTAAAAGCGGCCATCCTTATAATATT

>A\_MG\_388\_LR\_LVV\_18\_-\_MT214089 Tomato common mosaic virus (ToCmMV) - DNA A

ACTGGATGGCCGCGCAAAAATATGGACTTGGGCGCTTTTTCTGGCCCAATTAACAGGC  
CTGACAAGCTTAGATATTTGTAACA ACTTAGAGCCCAAGTTGTATAACGGCTATAAATTGA  
ATCTCTATGTTATTTGAACTTTAATTCGAAATGCCTAAGCGAGATGCCCCATGGCCCCACAG  
GGCACCTTCGACGAAGATTAGCCGTT CAGCTAATTTCTCCCCTCGTTCGGGAACTGGGCTG  
GGCTTAGCAAAGCCGCTGAATGGGTCAACCGGCCCATGTACAGGAAGCCCAGGATATACA  
GAACTATGAGAACGCCCGACGTCCCTAGAGGCTGTGAAGGCCCATGTAAGGTCCAGTCCTA  
CGAGCAACGCCACGATATTTACATACTGGGAAGGTGATGTGCATATCAGACGTCACACGT  
GGCAACGGAATTACACACCGTGTCCGTAAGCGTTTCTGCGTTAAGTCTGTGTATATTCTAGG  
GAAGATATGGATGGACGAGAACATCAAGTTGAAAACCATACGAACAGTGCTATGTTCTG  
GTTGGTCAGAGACCGAAGACCGTATGGCACCCCTATGGATTTTGGCCAGGTGTTCAACATG  
TTTGACAACGAGCCCAGCACTGCAACCGTGAAGAACGATCTCCGTGATCGTTTTTCAGGTCA  
TGCATAAGTTCTATGCTAAGGTCACAGGTGGACAATACGCAAGCAACGAGCAGGCGCTTGT  
CAAGCGGTTCTGGAAGGTCAACAATCATGTGCTCTACAACCATCAAGAAGCTGGAAAATA  
CGAGAATCATA CGGAGAACGCCCTATTATTGTATATGGCATGTACTCATGCCTCAAACCCC  
GTGTACGCAACTTTAAAAATTCCGATCTATTTTTATGATTCGATAACAAATTAATAAATTTT  
GAATTTTATTGAATGATTCTCGAGTACAGCATTTACATATCGTCTGTCTGTTGCGAAGCGAA  
CAGCTCTAATTACATTATTA ACTGAAATAACGCCTAGCTGATCTATGTACAACATAAGTAA  
ATATTTAAATCTATTTAAATATGTCATCCAGAAGCTCTCAGGGATGTCGTCCAGATTGGA  
AGTTGAGATAAGCCTTGTGGAGACCCAGTACTCTCCTCAGGTTGTGGTTGAACCGTATTTGG  
ACGTGGTAGACTCTGGTCCCTCGTGTATAGTATGTCCCTCGACGTTGTACATCTTGAAATAAAG  
GGGATTTGATAGCTCCCATATATAGACGCCATTCTCTGCCTGACGCGCAGTGATGCGTTCCC  
CTGTGCGTGAATCCATAGTTACTGCAGTTGAGGTTAACGTACAAAGAGCAGCCACAGTTTA  
GGTCTATCCTTCTACGTCGAGGTGCTCTCTTCGCAATCCTGTGCCGTAGTTTGATAGAGGGG  
GGAGTTGAGGATGATGAATTTAGCATTATGGAGTGTCCACGACTTGAGAGATGCGTTTTCTC  
CTTTGTCGAGGAAACATTTATAGCTGGCCCCCTCGCCAGGATTGCAAAGCACGATGCATGG  
GATACCACCTTTAATTTGAACTGGCTTTCCGATTTACAGTTTGATTGCCAATCCTTTTGGGC

CCCAATCAATTCTTTCCAGTGCTTTAACTTTAGATAGTGCGGTGCGACATCATCAATGACGT  
TATACTGCACATCGTTTGAGTAAACCCTAGAATTGAAATCCAGGTGTCCACTTAGATAATTA  
TGTGGGCCAAGTGCACGCGCCACATCGTCTTCCCGTCCGACTATTACCCTCGATGACAAT  
ACTGATAGGTCTGATAGGCCGCGCAGCGGCATCCCTTCCAAAATAATCATCAGCCCATTCT  
TGCATCTCGTCGGGCACGTTAGTGAATGAGGAGAGGGGAAACGGAGGAACCCACGGTGCC  
GGAGCCTTTTGAAAATCCTCTCTAGATTAGCCTTACATTGTGATAGTTGACGAGGAAAGT  
CTTGGGGTCTCCGGCCCTGATAATGTCGAGAGCCTCTCCCGGAGAAGGTGCATTGACGGCG  
TTGTGGTACACGTCGCTTTTATTTGCCTTTGTTCCCCAGACACCTTGTACTGTCCGGATTCA  
CAATAATCACCTTCTTTGGTGATGTAATTCTTGACTGCATTGGTGTCTTTGGCTGCCTGAACA  
TTTGGGTGAAATCCGGCAGACCGTCTGGGGTGAGTGAGGTGCAAAAACCTAACATCCTTGA  
TATTCGATTTTCCGGAGAGTTGGACAAGACAGTGAAGATGGGGGAACCCGTCGGAGTGTC  
CTCTGGCGACGCGTATGTATATGGGTTTGACGACTGACCACGGAAGACATTGAAGCATT  
TGAAGAGCTTCATCTTTTGGTATATCGCACTGTGGATATGTTAGAAATATGTTTCTCGCCGTT  
AATCTGAATATATTAGGGTCCGTGGCATTTTTGTAATATAGGTGAGGACACCAGGGATTG  
CTCTCAACTTCTGTGCTATTTGCTGGTGTCTGGTGTCCATTTATACTAGAACTCTCTAGGG  
TAATCTCAGGGGCAAAGCGGCCATCCATATAATATT

>B\_DF\_50\_LR\_LVV\_20\_-\_MT214087 Tomato chlorotic mottle virus (ToCMoV)- DNA B

ACCGGATGGCCGCGGATCTTCCTCACTCTTTAATCCTGGCCGTCCACGTGTTAATGAATT  
TAGTTGAGCGCGAATTTGAAGTCCGTGAATTGTGTTGAGCGCTTTATTTGAGTCCGCTTTCG  
GATGGCCGCCACGTCCATATATCTAAGACCGTTGAATTAATATGATAAGCGGAACTTTAT  
CGAATTTTCGCATGGTGTTTTTTATTGGTGATTAATTTGAAATTCGACCGTTAGATTGCACTT  
GATATTGAATATCGACCATCGTTCCTCGAATAATGTGTCATTTGTACAAGTATTTGTTATGTGT  
GCAATCATAACAACATACGTAACGTGGACCAATTAATATTGACAGTATAACCAAAAATAAC  
CCATTGATGCAATTACAGCTATCTATATAATGTGATTGATATTGATATTTTAAAACATCCA  
CTAAGAATTTTGAACATGTATTTAATAGTAATAAGCGTTCGTTGGTTCGTCATCAACCGTCG  
TAATAACGTACGATATTCTACGTTTAAAAGGTCACATGCTGTGGTACGCAATGATGGGAAA  
CGTCGATTGGGTATTTCAAACAAGCCCTCGACGATACTAAGATGTCTTCGCATAGGATTCA  
TGAAAACCAATATGGGCCTGACTTTGATTGGGCCATAACACAGCGTTATCCACTTTTATAA  
CTTACCCCTCTCTGGTAAAAGTGAGCCCAACCGTATTAAGTCATACATTAAGTTGAAACGT  
CTGCGCTTTAAAGTACTGTAAAGATTGAACGTGTTCCCTACCGATATGAACATGAATGGAAT  
ACCTGCTAAGATTGACGGGGTATTTCTTTGGTATTGTTGTGTCGATCGTAAACCTCATTGAG  
TCCTTCTGGTAGTCTCTACACATTCGATGAGTTATTTGGTGCTAGGATCCATAGCCATGGAA  
ATTTAGCGATAATCCCTTCTCTGAAGGATCGTTTTTACATACGTCATGTTGCTAAACGTGTCT  
TGTCAGTGGAGAAGGATAGTAATATGATTGACGTTGATGGGACGACAACACTCTCTAGTAG  
GCGTTATAATTGCTGGGCAAATTTAGAGATTTGATCATGAATCCTGTAACGGTGTATATG  
CTAACATAAGCAAGAACGCCCTACTAGTTTATTATTGTTGGATGTCGGAAACGGTATCCAA  
AGCATCTACATTTGTATCATTTGATCTTGATTATATTGGATAATTATATAGATCAATTTGCAC  
ATTATAAGTTGATAAGTTTAAATATGATAATAAATTGTCCTAGTGCTTATTAATACTCAGA  
AAAACCTTAAATATTTTAAAGACTTTGGTTCAGATGGAGTACAATTGGTATTAATACATTCT  
TGTAAGTTGACTTAAACAATCTCATTTAATTGGGCCAAAGATAAGGTAATGTTGGACTGCGT  
TCTTTGCGCCGCAACGATTGACGCTGATTCTCCTGGGTCTAGAATTATCGTGTCCAATCTGTT  
CAGGTCTTGTATGGATTTAGATCGTTGCCCGTTCGGAGTCCACACATGAATTGCTAAGTC  
CAATTGTAATCTGGAGGCCACGACTCTCCAGGTTAATTTCTATTGGGCCGTTAAGCCCA  
AATCTGGATGTCGAAGCGCATCTGACTAATTTCCCTCTCCCATATCCCGTAACCCACATGAAC  
AAAATCGATATCCTTATCTGAAAATTGCTTCGACAATATTTTAACTGTTGGTGCCCGGAAAG

GGATATCTACTGAGTGTTTTGCTGTGGATAGTTTTAACTTGCCCTTGAAGTTGGCGAAATGG  
GTCCTTTGGTGCACATTCGTATCGCTAACCCCTGTAGTATAATTTCCATGGAATTGGGTCCTTC  
AGCGAAAAGAATGACGACGAGAAATAATGTAAGTCTATGTTACATCTAATTGGGAAGGTC  
CATGACGCTTGCAATGACTCGTTGTCCGTCATTCTCTTGTTCATGTATTTCTACTATAACGGAT  
CCTGTGGCGTTTATCGGGACTTGCTGTCTGTATTTCGATGACACAATGATCTATTTTCATGCAA  
CTCCGACTGAGTTTAGCACTAATTTGAGATGCCGTAGATGGAAATTGTAGAACAATTTCACT  
TAGATCATGAGACAATTGATATTCATCTCTTTGAGACTCAACATAATTTAAAAGCATTGGGAG  
GGATAACCAATTGAGAAGTCAATTATATTTAAAAAAGGCTGCGCAGCAGAATCGACAAGT  
GAATTAATAAGTGTAATGATATGAACACACTAACAAGAATATCAGAAGACAATATGTGT  
TGCGCTGTGACGATTAACGAAATATATTGTGGTAATGATGATAGTCAGTACTAACTGGTTG  
TATTTATAGACGGATTGAAGACTGAGTATATACGAGGAAACAATGCATAACGACGTCGTTA  
TTTGACGGAATGGCATTCCCCTAAATTAAGATAATGGCATAATTTGTAATAATAGTTGGGCAC  
CGATTGGGGTCTTCTCAAACCTACTAAAGCAATTGGGGACTGGGGTCTTATATATACTAGAA  
CCCTCTATAGAAGTTCAATCTCSTTCACACACGTGGCGGCCATCCGATATAATATT

>A\_DF\_50\_LR\_LVV\_20\_-\_MT214086 Tomato chlorotic mottle virus (ToCMoV)- DNA A

ACCGGATGGCCGCGGATTTTTTTAAGGCCATTTATTTTGGGCCTCTTTTTGGGCCTTCAC  
CTTTAATTTTATTGAAAGTAATTTGACCCAATCATGATGCATTTGACGAGCTAAGATATTTA  
GAACTACTTAACGCCCAAGTTGCATAACGGCTATAAATTAACGTACATATGTCGATAGCT  
TTAATTCAAAATGCCTAAGCGCGATGCCCCATGGCGCCACATGGCTAGTACATCTAAGATT  
AGCCGGGGCGTTAATAATTCTCCACGTGCAGGAGTTGGGCCACGGTCCAACAAGGCCACTG  
ACTGGGTAAACAGGCCCATGTACAGGAAGCCCAAGATATATCGGATGTATAGAACCCCG  
ATGTTCCAAGGGGTTGTGAAGGCCCATGTAAAGTGCAGTCGTTTGAACAGCGTCACGATAT  
CTCCATACTGGTAAGGTGATGTGCGTCTCCGATGTGACACGTGGTAACGGTATTACACAC  
CGTGTGGGTAAGCGTTTCTGTGTTAAGTCTGTGTATATTCTGGGTAAGATATGGATGGATGA  
GAACATCAAGTTGAAGAACCACACGAACAGTGCCATGTTCTGGTTGGTCAGGGACCGTAG  
ACCTTATGGTACCCCTATGGACTTTGGCCAGGTGTTTAAACATGTTTCGACAACGAGCCTAGCA  
CCGCCACTGTGAAAAACGATCTCCGTGATCGTTTTCAAGTCATGCATAAGTTCTATGCTAAG  
GTCACAGGTGGACAATACGCAAGCAACGAGCAGGCGCTTGTCAAGCGGTTCTGGAAGGTC  
AACAAATCATGTCGTCTACAACCATCAAGAAGCTGGAAAATACGAGAATCATACGGAGAAC  
GCCCTATTATTGTATATGGCATGTACTCATGCCTCAAACCCCGTGTACGCAACTTTAAAAAT  
TCGGATCTATTTTTATGATTCGATAACAAATTAATAAATTTTGAATTTTATTGAATGATTCTC  
GAGTACAGCATTTACATATCGTCTGTCTGTTGCGAAGCGAACAGCTCTAATTACATTATTA  
CTGAAATAACGCCTAGCTGATCTATGTACAACATAAGTAAATATTTAAATCTATTTAAATAT  
GTCATCCCAGAAGCTCTCAGGGATGTCGTCCAGATTTGGAAGTTGAGATAAGCCTTGTGGA  
GACCCAGTACTCTCCTCAGGTTGTGGTTGAACCGTATTTGGACGTGGTAGACTCTGGTCCTC  
GTGTATAGTATGTCCTCGACGTTGTACATCTTGAATAAAGGGGATTTGATATTTCCCAAGT  
ATACACGCCATTTCTGCTGATGTGCAGTGATGAGTTCCCTGTGCGTGAATCCATGTCCA  
GCGCAATCTATGTGTACGAAAATGGAGCAGCCGCACTGTAAATCAATTCGTCTTCTTCGTAT  
AGCTCTCTCTTAGCAGCCCGATGTTGAACTTTGATAGAGGGGGGAGTTGAGGAAGATGAA  
TTGTGCATTGTGCTTTGTCCAACACTTAATGCTGAGTTCTCCTCTTTGTCGAGGAAACATTT  
ATAGCTGGCCCCCTCGCCAGGATTGCAAAGCACGATGCATGGGATACCACCTTTAATTTGA  
ACTGGCTTTCCGTATTTACAGTTTGATTGCCAATCCCTTTGGGCCCCAATCAATTTCCAG  
TGCTTTAACTTTAGATACTGCGGTGCGACATCATCGATGACGTTATACTGCACATCGTTTGA  
GTATACCTTTGAATTGAAATCGAGGTGACCACTCAAGTAATTATGGGACCCTAATGCACGT  
GCCACATAGTTTTGCCACTTCGAGAATCACCTTCGATTATTATACTGATAGGTCTTTCCGGC

CGCGCAGCGGCATCTCTCCCGAAATAGTCATCTACCCAATCTTGCATCTCGACAGGCACGTT  
AGTGAACGACGAGAGGGGAAACGGAGGAACCCAAGGTTCTGGAGCCTTTGCGAAAATAC  
GCTCTAAATTTGATCTAATGTTATGATGTTGAAGCACGAAATCTTTGGGTTGTTCTCTTTTA  
ATATATTGAGTGCTTCCATGACTGATCCTGCGTTGAGAACCTTGGCGTACGTGTCGTTGGCA  
GATTGCTGACCTCCTCTAGCTGATCTGCCATCGATCTGGAAAACCTCCATGATCAACGAAGTC  
TCCGTCTTTCTCCACGTATGATTTGACGTCTGACGAGCTCTTAGCTCCCTGTATGTTTGGATG  
GAAATGTGCTGACCTACTTGGGGAGACGAGGTCTGAAGAAGTGTGTTTTTGCAGCTGTATT  
TACCTTCGAATTGGATGAGCACGTGGAGATGAGGTTGCCCATCTTCGTGTAGTTCTCTCGAG  
ACACGAATGAACAATTTATTTGTTGGTGTGTTCAAGGCTAATAATTGGGAAAGTGCTTCTTC  
TTTGGAAAGAGAACAAATGTGGATATGTTAGAAAATAATTTTTGGAATTTACTCGGAAATGTT  
TGGGCGGTGGCATAATTTGTAATAATAGTTGGGCACCGATTGGTGGCTCTCTAAACTTGCTCT  
AGCAATTGGGGACTGGGGTCTATATACTAGAACCCCTCTATAGAACTTTCAATCTCCTTC  
ACACACGTGGCGGCCATCCGATATAATATT

>A\_DF\_166\_LR\_LVV\_16\_-\_MT214092 Sida micrantha mosaic virus (SiMMV) - DNA A

ACCGGATGGCCGCGGATTTTTCCCCCCCCCACGTGGCGCGCTGGTGGTTCGTGCGATCTCT  
CTCCCCCCTCTCGCGCGACGTGGAGCTCTGGTGTCCGCGCGGTGCCCGCCGCGCGCTCT  
GCCTTTAATTTAAATTAAGGAAATAACTTTCATCAGGACCAATGAAATTGCGTCTTTTAAG  
CCTAGATATCAGCGTAAGACTTGGGCCCTAAGTTGTTTGACGGCTATATAATTAAGTCATGT  
ATGACGTCAGGAATTATTTCAAATGCCAAGCGGGATCCCTCATGGCGCCAGATGGCGGG  
AACCTCAAAGGTTAGCCGCTCTACCAACTTTTCCCCTCGTGGAGGTGGAGGCCCAAAGTAC  
AACAAAGGCTCAGAATGGGTTACAGGCCCATGTATAGGAAGCCCAGGATATACAGGATG  
ATAAGGACTCCTGATGTTCCAAGAGGCTGTGAAGGGCCCTGTAAGGTCCAGTCTACGAGC  
AGCGTCACGACATCTCACATGTCGGGAAGGTCATGTGCATATCTGATGTCACACGTGGCAA  
CGGTATTACCCACCGTGTGGGTAAACGTTTTTGTGTCAAGTCTGTGTATATATTAGGCAAGG  
TCTGGATGGATGACAACATCAAGTTGAAGAACCACACGAATAGTGTGATGTTCTGGTTAGT  
TAGGGACAGGAGACCGTATGGCACTCCCATGGATTTTGGCCAGGTGTTCAACATGTTTGAC  
AACGAGCCTAGCACCGCCACTGTGAAAAACGATCTCCGTGATCGTTTTCAAGTCATGCATA  
AGTTCTATGCTAAGGTCACAGGTGGACAATACGCAAGCAACGAGCAGGCGCTTGTCAAGC  
GGTCTGGAAGGTCAACAATCATGTGCTCTACAACCATCAAGAAGCTGGAAAATACGAGA  
ATCATAAGGAGAACGCCCTATTATTGTATATGGCATGTACTCATGCCTCAAACCCCGTGTAT  
GCAACTTTAAAAATTCCGATCTATTTTTATGATTCGATAACAAATTAATAAATTTTGAATTT  
ATTGAATGATTCTCGAGTACATAATTTACATAGGCTTTGTGTCAGTGGCAAAGCGAACAGCTCT  
AATTACATTGTTAAGGGAAATTACACCTAATTGTTCTAAGTACATCATTACAAGGCGTCTAA  
GCCTAATCAAATAAGTCGTTCCAGAAGCTGTCAGAGAAGTCGTCCAGACTTGGAAGTTCAG  
GTAGGCCTTGTGGAGACCCAATGCTTTCCCTGAGGTTGTGGTTGAACCTTATCTGTATGTGGT  
ACACTCTGGTCCCTCGTGTACAGCGGATCCTCTACGTTGTACATCTTGAAATAAAGGGGATTT  
GATATCTCCCAAATATAGACGCCATTCTCTGCCTGACGTGCAGTGATGAGTTCCCCTGTGCG  
TGAATCCATGTCCTGTGCAGTTGAGATGTTGGTATATGGTGCAGCCGCACTCCAGGTCCACT  
CGTCTACGCCTGATTGCTCTCTTCTTGGCAAATCCTGTGTCTCGGTTTGATAGAGGGGGGCGTC  
GAGGAAGATGAATTTAGCATTGTGAAGTGTCCAGGCTTTTAGTGATGCATTTTCTCTCTCTC  
GAGGAATGCTTTATAACTGGCCCCCTCCCAGGATTGCACAGCACGATTGAAGGGACCCCA  
CCTTCAATCAAACGAGGCTTTCCGTACTTGCAGTTTGTCTGCCATTTCTGTTGGGCCCTATT  
AGCTCTTTCCAGTGTTCAACTTTAGGTAATGCGGAGCGACGTCATCAATGACGTTATACTC  
CACTTGATCAGAATATACCTTTGAGTTGAAATCCAGATGGCCACTGAAGTAATTATGTGGG  
CCTAATGCTCTAGCCACATCGTCTTTCCCGTTGAGAAATCACCTTCAATGATGATACTAAT

AGGTCGTTCCGGCCGCGCAGCGGCACCTCTCCCAAATAGTCATCTGCCCAAGCTTGCATC  
TCTCTCGGTACGCTAGTGAAAGAGGAGAGGGGAAACGTAGGGGCCCATGGCTCCGGAGCC  
CTTGTAATATCCTATCTAAATTACTATTTAGATTGTGAAACTGAAATAAGAACTTTTCAGG  
CAGCTTCTCACGGATTATCTGCAAGGCGACGTCTTTGGAAGGTGCGTTCAAGGCTTCTGCGG  
CAGCGTCGTTAGCTGTCTGGCAACCGCTCTAGCACTTCTCCGTCGATTTGGAATTCCCC  
CACTCGATAGTATCTCCGTCCTTGTGACATAGGATTTGACGTCGGACGATGACTTAGCTCT  
CTGAATGTTCCGGATGGAAATGTGTTGACCTTGTGGGGAGACCAGGTGCAAGAATCGTTGA  
TTCGTGCATTGGAATTTCCCTTGGAACTGGATAAGGACGTGGAGATGAGGCTCCCCATTTTC  
GTGGAGCTCTCTGCAGATTTTGATGAACTTCTTGTTAACTGGTGTGCTAAGCTCTGTAATTG  
GAAAGTGTCTCTCTTTGGTTAAGGAGCACTGGGGATATGTCAAGAAATAATTCTTGGCA  
CTTATTTTAAAACGCTTTGGCGGTGGCATTTTTGTAAATAAGGGGTGTACCCAATTGAGAG  
CTCGCTCTATAAGTCATATGAATTGGGGTAATGGGGACAATATATAGTAGAAGATCCTAAG  
GGGCTTTAAGCGGCCATCCGCACTAATATT

>GO\_298\_LR\_LVV\_17\_-\_MT214094 Plant associated genomovirus 12

TAATGTTATAGCCCAGGTGACGGGTGACAACCCTTATAAAGAGGGCCGCCACCTCGCCCC  
ACGAAGACCCACCTCAACACTTTCTCCCCACATGCGCTATGCCTCTCCGTCGGTACAAAG  
GGCGCAACAGCGTAAGCTACAAGCGCCGTTCAAATCCCGCAAGCCAGCCCCAAAGCGGA  
GAAAGTATGCGAAGCGCAGGCCGATGACACGGAAGCGAGTCCTCAACATCGCGTCTGTGA  
AAAAGCGGACACAATGGGAACGACCTCTGTTCTGTCGGATGGTACGACATTCAGGGAGC  
CATTTGTCATGAACGGCGACAAAACGTATATGATTCCCTGGATTGCGACTTGGCGCAACTTC  
CAGACCAGCTCAACAAACAGCACTCGGGTCTCCGACAGGACCCACGAGGAGCGCCACG  
TCATGCTACATGAGGGGCCTCAAAGAAAATATCCAACCTCGGGACGAACGATGGCCAGTGT  
TGGCAGTGGAGGCGCATATGCTTCAATGAAGGGCGACGACATCTACAGCAACCAGAGC  
ACCCAGTTCAGGATCGCATTCCAGTCGAGCGCGGGGTACCAACGCGTGTCTGCGATTGGA  
ACAACGACAAGACCAACGGGAGCACGACTTATCCAGCCCCTAGCGTTATGCTCGCGGGCC  
CTGTCTTCAAGGGCACGTTGGGTCAGGATTGGGACGATCCATTCATCGCACCAGTGGACCC  
ACTGCGTGTGACTCTAAAATACGACAAGACGCGCTATCTACGTTCCGGAAACAATTTGGA  
ATGTTGAAGACAACCAGGCTGTGGCACCTATGAACGCCCACTCCACTACGACGACGAT  
GAAAATGGCGGTGTAGAAGACGGTGAACCGTATCGGTGAAAACGCATGGAATGGGAGAT  
TACTACGTAATTGACTTGTTCGTGACGCCACAGGTGCAGTAGCAGGCAGCCAATGAATC  
TGCGAAGCACCTCTACTCTGTATTGGCATGAAAATAGGCTCCTGTAGCTCCACAAAATA  
CAGTTTGCTTCCAACCAATCAACATCGCTCTGAATCAAATCTCGCTTACTTGCAGCTGACCG  
GTCAGACAACCTCAGCCACATCTCTAGACGTGGGTCTCTGTTAGCCAACCAGATGCAAGGT  
CTTCCCCATAAAGTTGTACGGGATCTCTGTACAGCTCTTTGACTGTGACCACACTCTGTGC  
CCCAAGCCACTCTTCCATGAATGGAAATATCCAATACCACCTCGCATATCGTCGAAGACA  
GCGTACGCAGCTCCCGGTGCATCACGCAGGAGAAGCTTGCCGGACACGATGCCATACTGT  
ACACGTGTGGGCCAGTGATCTAGCCCAAACAGTCTTTCCAAGTCGTGAAGGACCATAGAG  
TACAAGAGACCGCATTCTGCCTTGCTTAGTCAGCATTGCACACACTCACGTAGCGGTCCGA  
GCGGCGGAGCGAGATCGGACCTTGCGGAACCGAGCACTACGCTGGCAAAAACCCCTAGGA  
GACTATAGACCTCCCGAGAGAGCCCCGCGACCCAGAGGGGAGCGTAGGGCGATTGAGACG  
TACCTTCTACTGGATCATTGCAACAAGCTGTTCTCCCCATCGAGCCAGCTCAGGTACCATT  
CCAAGCTCAAATGCTTCCCATCGGAACCCACATAGGGTTCTGGGGTGGGGGCGTAGGGCG  
CGTCGGCATACTTGTGAGCTCGGTCCAACGAGTGACAAGTGTCTTCGGATCCAGCTGTGCA  
AGCAGGTCAAAAACTCGTCTCGACTTTCTGCCGAGACAATCTCGCGCCATTTATCCGCAA  
CTTCAGGTAATCCACCTCCGCCCGCCTCGCCAACCCCCCTGCAACAACGTTTCCATCTTTG

ACTGCATAGTCGTAACCGAGCTCCGGACGACCTCGAGATGGCGTAATGTTCCGGGTGGTGGC  
CTCTGACATCAAAGAAATTGGGTTCGTCGGGATTGCTTCTTCTTTCCGAAATCCAGAAAAAC  
ATGGAGGTGAGTACCTCCATCAGCGTGATCTTCTCGTCCGATGATACACTCAGCTCCAAGC  
GCTGACATATGGTCTGAAACGGACCACTCATCAAGGTCTCCACACTGAGCGTAAGTGAGGA  
GTGCATAGCGTGCCGAGAATAGAAAAGTCATGTGATAAACCTGAGGAACCTGGGCAAAC

>DF\_62\_LR\_LVV\_12\_-\_MT214093 New world bipartite associated alphasatellite

ACCCCGCTTCGCCACAACCTCTTCGCCAAAGGGACCCACTCTAGCAATATAAATATGACTAT  
TTTGTGCCTATTGCCTTCATAATCCAAATGACACAAAGTCGAAATTGGTGCTTACTCTCTTT  
GCATACACCCTCCCTCTCTTTGACTCTCTCCCCGAGTGGGCTAATTATATAGTTTTCCAGGAA  
GAGGAGTGTCTACGACCAAGAAGAGACACCTACAGGGGTTTCGTTACTCTCAAGAAGAGT  
CAAAGGCTATCCTTTCTGAAAGGCAGATTAGGTAATGGCGTCCATCTCGAGATCTCTCGGG  
GATCCTCATCCAGCAATAGAGATTATTGCAGAAAGGATGATTCAAGAGTCGCTGGGCCATG  
GGAATTCGGTGTACTTGCAGAGCAGGGGAGCAATAAGAGGAAGACGATGGAACGTTTTCA  
GGAAGACCCAGAGGAGGTCCGACTGGCCGACCCTAAGTTATATCGTCGCTGCCTGGCGAC  
AAAGATTAATAAGGAGTTCGTGGTCTGGTACTCCCTGCATTTGACAGACCTTGGCAGCTGC  
TGGTTGAGAAGATATTGGACAAGGGCCAGATGACAGAACTATCTTATGGGTGTATGGCTC  
TCAAGGCAATGAAGCAAGACGACCTGGGCCAAGTCTAAGATTCAGGCCGGCTGGTTCTA  
CTCCAGAGGAGGAAAGGGAGAGAACATCAAGTACTCGTACGCCGAGCACCTAGGTATGT  
CATATTTGATCTGCCAGACAGGTTGAAGATGTGCTCCAATACTCGGTTCTGGAGGAAATTA  
AGGACAGGTTAATTAGGAGTGGTAAATACGAGCCTATAGATTTTAATTGTAGTGACAAGGT  
TCACATTGTCGTTTTAGCTAATTTCTCCATCGTTAGATGTTGAGCACGATAATAAGGGAA  
ATGTAATTAAGCGCCAACCTGTTAAGCAGAGACAGGGTATGTATAGTTAACATTGACGAGTC  
TGTTGTTGTACGAGAAGAAGAAACGGTGACGTTTGCTCGTTATTTGAATAAAAGAAAAAA  
ACTTGTTTTTTGTACAGAAAAAAAGGACTCCGCCTGGTGTCTGGCTTATATTTACAAATT  
TGCCATCACCCACTAACAACCTATGAAAAGAAGGGACCCGAGGGACCACAACCAAAAAAA  
AAGAAAAGAAAACCACTAACCAACAGGGATCGATGACGTGGACAACAACAGTTTTTTGTT  
ACCGGTGACGTGTCAGTCATATGTGTTAGTTACCGGTTCTATTGCCTTGTAAGGTGACCGGC  
TACCGTGGCGAGCTACCGGTAAGAAGCGGGTATAGTATT

>B\_MG\_016\_LR\_LVV\_06\_MN746970 Euphorbia yellow mosaic virus DNA-B

ACCGGATGGCCGCGGTTTTTTGGTGTCTCTATCCCCGGCCCAGGCCCAAACGCATTGTATT  
TTGTCCGGGACCACACAGCAACCAAGCTGACCAATCAGACTGCGCGTGACGTGTCTAT  
TTAAATACAACCTACTAGACAAGTTGTGGTCCCTATAAATGTAGATGACAACGACAGCACA  
TCAACTCTTTAATTTGAATTAAGCCCACTTTGTATGGCGGGAGCCTTCAGTCGTTGTGGTCT  
CAACCACAATTCGAAATAAGCTGTCTGCAAGCCGACGTACATCCGAGTCGCTCGAGAGCTC  
CACGGTCCAATCATAAACGTTGTACATAGTCTCGTTAACCAACCGAATTTGTGGACTGGTT  
ATTTAAGGACGATATGGATTGGACCTCATATCATATCATCTCGATAACCATTTTATGAAATG  
TATACGACTAAGTATAGACGTGGTGGTTCATCTCTTAAGCGACGAGGTTATTCACGACATC  
CAGCGTTTAAGCGAATGCAGAATGGAAAACGTTCCGACTGGAGACGTCGACACAGCAGTC  
CTTGTAAGGCCCATGACGATACTAAGTGGACGGCCCAATGTATACATGAAGATCAGTTCCG  
CCCAGAATTTGTATTGGGCCATAATATAGCTACGTCGACCTATATTAGCTATCCTAGTATGA  
GTAAGACTGAACCGAACCGATCCCGATCGTATATTAAGTTGAGGCGTCTACGCTTTAAGGG  
CACTCTGAAGGTGAGCGTGTACACGTCGATGTCAACATGATCGGTTTCAATCCAAAGATA  
GAAGGCGTATTCTCTATGGTTCGTTATTGTTCGACCGTAAACCTCACTTGGGTCCAACCTGGATG



CCTTCACACATTTGATGAGGTATTTGGCGCAAGGATCCACAGTCATGGTAATCTAACCATCA  
GTCCTTCTTTGAAGGATCGGTAACATCCGCCATGTATTCAAGCGCGTCATATCTGTCGAG  
AAAGACACGATGATGGTGGATATAGAAGGGTCGACGTGTTTATCCACTAGGCGTTCTTCTT  
GCTGGGCCACTTTAAGGATACGGAACGAGAGTCATGTAATGGTGTATATGCGAATATAAG  
CAAGAACGCCATATTAGTGTATTATTGCTGGATGTCGGATCATATGTCCAAGGCATCTACAT  
TTGTATCATTTGACCTCGATTATGTCGGATGACCAATAAGAACATATTTAACATGATATTAA  
TCAAATAGCTTCATCGTACATGCAAATGATAACAACCTCAATAATTGAATTAATAACGTA  
TTATTTAATCAAGCGTTTTATTTCTGGGAGGAATACAATTAGTGCTAATACATTCTGAACG  
GTTGACCTAACTATCTCGTTCAGCTGACTCATTGACATCGATATGTTCGAATGTGTTCTCTGA  
GCAGCTAGTACGGAAGCTGAATCTCCCGGGTCTAATACGGGAGTCCCTGGCCTATTTAACT  
CCCGATATGGATAAGCGGCGTCTCTCACATCTGAATCCGCATCTAAATGGCCCAGTCTTAT  
GTTGGATCTGGTGGCCCATGATTCACCAGGCCTTATTTGATTGGGCCTTGTAGCCCAAGTC  
TCGATGATGATGCGGATCTAATCATTCTTCTCTCCATTTGCCGTAGCCACATGACTGAAG  
TCGATATCCTTATCTGAAAACCTGTTTGGACAGGATCTTGACAGTTGGCGCTCTGAAAGGGAT  
ATCAACGGAATGTTTTGCCGTCGATAACTTCAGTTTACCCTTGAACCTTCGAAAATGCGTCA  
TCTGATGAACGTTTGAGTCAGAAACCTTATAATATAGCTTCCATGGAATTGGGTCTTTGAGT  
GAGAAGAATGATGATGAGAAATAGTGGAGATCTATGTTGCATCTGATGGGAAATGTCCATG  
ACGCCTGTAAGGATTCATTTTCAGTCATTCTTGTCTGATGAATCTCCACTACTACCGAGCCCG  
ACGCATTAATTGGCACCTGTTGCCTATACTCTATTACGCAATGGTCGATCTTCATGCAACTG  
CGTGAGAGTCGGGCTCCTAATTGAGACGCCGTTGAGGGGAATTGCAAGACTATCTCAGTTA  
GGTCGTGCGATAGCTGATACTCGTCACGATGTGACTCTATGTAATTGAAAGCGCTCGGCGG  
ATTTACTAACTGAGACCCCTCCATTATATTATGGAACTTGCCCGCGCAGCGGCACCCCTTC  
CCCCAAATTGAACGACTGAGGGAAATTGATAGGTGCCAACCTTATGGAAGGACGATATGC  
GTTAGCGATAACAATTTGGGGAAATTTGGAAGATACGATAAGCCTATGTGCAGATTATGAT  
TTAATCGGCTGGTAATCTGAGATGAAGAAGTGGAAATTTGCCTATATGTTAGCTATTGAAG  
GTCTATATATAGGCAGTCAGATGCGATATGCAACAGGCTGATGGCAAATTTGTAATAGAA  
GTCAGGACACCAGGGGGAGTCTCTCTAAAACCTATTTGTGTTGGTGTCTGGTGTCCCAT  
TATACTAAAACCTCTAGGACACTGGGGGGTACGTGGCGGCCATCCGTTAATATT

>A\_MG\_016\_LR\_LVV\_06\_MN746971 Euphorbia yellow mosaic virus DNA-A

ACCGGATGGCCGCGATTTTTTGGTGTCTCTATCCCGGCCAGGCCCAAACGCATTTAGTTT  
TATCTGGGACCACACACAGCAACTAAAGCTGACCAATAACATCACTGCTGACGAGGCTAT  
ATAACTTTGAGCCTACTTGGCCGATAAGTTGTGGTCCCTATATATTTAAAGTAATTGACATT  
ATTCGATATCTTTAATTTGAAATGCCTAAGCGAGATGCCCATGGCGATTAATGGCGGGGA  
CCTCCAAGGTCAGTCGTAATGTCAATTATTCGCCCCGTGGTGGTCTAAAATAGACAAGGC  
CTCTTCATGGGTGAACAGGCCCATGTACAGGAAGCCAGGATCTATCGCATGTATAGAGGC  
CCAGATGTTCCGAAGGGATGTGAAGGGCCTTGTAAAGTCCAGTCATACGAGTCTCGTCATG  
ACGTTTCCCATGTTGGGAAAGTGATATGTGTATCCGACGTGACACGGGGCAATGGTATTAC  
GCATCGTGTGGCAAGCGATTCTGCGTCAAGTCTGTGTACATACTAGGGAAGATCTGGATG  
GATGAGACCATCAAGTTGAAGAACCACACGAATAGCGTCATGTTCTGGTTGGTGGCAGATC  
GTCGACCATATAGCTCTCCTATGGATTTTGGCCAAGTGTTCAACATGTTTCGACAACGAACCC  
AGTACAGCCACTGTGAAGAACGATCTCCGCGATCGCTTCCAAGTGATGCACAAGTTTTACG  
CGAAGGTCACTGGTGGACAATATGCGAGCAACGAGCAGGCGATCGTCAAGCGTTTTTGGGA  
AGGTCAACAACCTATGTGGTGTATAACCACCAAGAGGCAGGGAAATACGAGAATCATAACG  
AGAACGCGTTACTATTGTACATGGCATGTAATCATGCCTCTAATCCTGTATATGCGACGTTG  
AAAATTCGGATCTATTTTTATGATTCGATAACAATTAATAAAAATTGAATTTTATTTTCATG

ATTCTCGAGTACATCATTTACATATGAGCGATCAGTTGCGAAACGAACAGCCCTAATTACA  
TGATTAAGACCGACGACACCCAATTGATCTAAATACATTA AAACTAAATGCCTGAATCTAC  
TTAAATAAGTCATCCCAGAAGCTCGAATCGATGTCGTCCATACTTGGAAAGTTCAGGAAAGC  
TTTGCGTAGATTCAAGTGCCCTCCTGACGTTGTAATTGAACCGGATCTGGATGTGGTATATCC  
GGAGCGACGTGTA AATCGGGTCCTCGACCCTGATGATCTTGAAATAGAGGGGATTTGGAAC  
CTCCCAAATAAAAAACGGAATTCTCTGCCTGAGACACAGTGATGAACTCCCCGGTGCTTAAA  
TCCATAATCTGCACAGTCGATATGGAGAAATATGGAACAGCCGCAGTTCAAGTCAATCCGT  
CGTCGACGTATAGCTCTCCTCTTGGCTATTCGGTGCTGTGCTTTGATAGAGGGGGCGTGGA  
GGAAGATGAATTTAGCATTCTTGCGTGTCCAAGCTCTCAACGATGCATTCTCCTCTTTGTTGA  
GGAAGTCTTTATAGCTAGCCCCCTCGCCTGGATTGCACAGCACGATTGATGGTATCCCGCCT  
TTAATTTGAACCGGCTTTCCATATTTACAGTTGGACTGCCAGTCCCTTTGGGCCCAATCAA  
CTCTTTCCAGTGCTTTAACTTTAGATAATGCGGAGCGACATCATCAATGACGTTGTACTCCA  
CGTCATTTGAGTAAACCCTAGAATTGAAATCGAGATGCCACTAAGATAATTATGTGGGCC  
TAAAGCTCTAGCCACATGGTCTTACCCGTTGACTATCCCCCTCGACTACGATACTAATAG  
GTCTATCTGGCCGCGCAGCGGCACCCCTTCCAAAATAATCATCAGCCCCTCTTGCAAATC  
AGACGGGACATTGTTAAATGACGACAGCTGAAATGGGGGAACCCAAGGAAGGGGTGGCTT  
AATAAAGAGGCGCTCGACGTTAGCTTTGACATTATGATAATTCACGATGAACGTCTTCGGA  
TCACCAGCCCTTATTATGTGAGAGCCTCTCCTGCAGTTGCTGCATTGACAGCGTTGTGGTA  
GACGTCATCTTTATTGGACTTGGAAACCCCCAGACACCTTATATTTGCCGGATTCAACAATAAT  
CACCTCTTTGGTGATGTAATTTTTGACGGCGTTGGCGTCCTTGGCCGATTGCGCATTGGGT  
GAAATTCGGCAGACCGTCTGGGGTGAGTGAGGTTGAAAACCTAGCATCCTTGATGTTGGA  
CTTGCCGGAGAGTTGAATAAGACAGTGGAGATGGGGGAACCCATCGGCGTGGAGCTCTCG  
AGCGACTCGGATGTACGTCCGCTTGACGACAGTCCATGGCAAGTCCCGAAGCAACTGCAG  
AACTTCATCTTTCGGAATATCGCACCGGGGATAAGTGAGGAATATATTTTTGGCCGTTAGGC  
GAAATGAATTAGGGTTCCTGGCATAATTGAAAATAAAGCCAGGACACCAGTGGGAGTC  
CTCTCAAAAACCTAATTGTCGTGGTGTCTGGTGTCCATTTATACTAAAAGCCTCTAGGAC  
ACCAGGGGGTACGTGGCGGCCATCCGTATAATATT

>B\_MG-150\_LR\_LVV\_01\_-\_MN337872 Cleome leaf crumple virus (CILCrV) - DNA B

ACCGGATGGCCGCTGGATCTGTTTTATGTTTCGGCCCGCGCAAGCGGAAGAGTTGGGCCGAC  
GATGGAAAAAAACTCGGCCAGATAAGAAAAGGGATAGGATTTTCGCTCTCCGCGAAATAA  
AAGAGACCCGATTGGAAGGCGCGTGTGGTCCTCGATGACATGGCAATAACGGATGGCCAA  
TGGGAGTGGCGCTTCTCGGCAATTTAAAGGGGTACGATTTGGGACCACATGCAATTGCGAC  
GTGACATATTTATCAGTATAGCGCATGCTGTGGTACAGGATGCATAAGGCGAGTTGAACTG  
GCAATTTGAATTTGAGCACGTCGCCCTTTCTGTGGTCACGGACCACATTGAAAACCAATCG  
AGCTCCGACGTCAAGTCTACGTCGACAAAGACGGGGATACTCTCGAGGAACACGTGGAC  
CACTGGGTTTTCGAATAGGAATTCTAGTTATTCAGATATGGGTTTTGGACGCTTTATATAATG  
CGCCAGTTGACAAAGAGTATGCCATCATTAGGTATTTTGACAGGCATATCTGAATATGTATT  
CCAGTAAATACAGACGTGGTGAATCGTCCACTCAGAGGCGAAGATATTCACGCTATCAAGC  
ATCTAGACGCTCACACGGTGTGAAGCGTAGTGCTGGGAGACGTCGAGGTATAGTTTCTTTG  
AAGAGCCGTGATGAAGGCAGGATGCACTCACAGTGCATTACGAGGACCAATTTGGTCCG  
GAATTCGTTATGGGGCATAATAATGCCATTTCAAGCTTCATCACGTACCCCACTCTCGGTAA  
TGTTGACCCATGCCGACGAGGTCCTATATTAAGTTAAAACGCTTACGTTTTAAAGGAACCC  
TCAAGATTGAACGAGTTCATGCGGATGTCAACATGGACGGTAGAGCACCGAAGATTGAGG  
GAGTGTTCCTACTTGTGTGGTGGTCGATCGGCGACCACATTTAAGCCCCACTGGACGCTG  
CATACGTTTGACGAGATGTTCCGTGCCAGGATCCATAGTCACGGGAACCTTATCCATCGTTCC

CGCTCTGAAAGACCGGTTTTACGTGCGGCACGTTTTGAAACGTGTATTGTCGGTCGAGAAG  
GACTCTCTGATGGTGGATATAGAAGGGACGACCGTCTTGTCTAGCAAGCGGTTTAGCTGTTG  
GTCATCGTTTTAGGGATCTCGAGAGAGATTCATGTAATGGAGTCTATGCTAATATTAGCAAG  
AACTCCCTTTTAGTTTACTACTGCTGGATGTCCGACGCGATTTCCAAGGCGTCGACATTTGT  
ATCATATGATCTGGACTATGTTGGCTGAATAAAGTGATTAATGATGTTTATGAAGATAAACA  
TGTGACAACATATAGAGGATAATCTGAATTACAGGCACGATAACTATTCTAAAGGCTTGGT  
ATGCGAAGGGACACAGTTTGTATTTATGCATTCCCTGGACCGTCGTCCTTACTATCTCGTTGA  
GTTGGGCTAGCGACAGCGTTATGTTGGACTGTGTCCGCTGAGCCCCAAGTACAGAGGCAGA  
CTCTCCTGGGTCCAGGATTGGTGTACCCAATCTGTCTAGGTGCCTGTATGGATGCAGCGCAT  
CCCTCCGTTTCAAGATCCGCATCGGTATGGGCCGAGTCGATAGCACTTTTACGCGCCCAAGA  
CTCTCCTGGTTGTATTTGATTGGGCCGCCAACCATAATGTGACGACGATGCGGATCTCG  
CCATTCTTCTCTCCACTTGCCGTACCCACGTTGGCAGAAATCGATATCCTTCTCGGTGAAC  
TGCTTCGACAAGATCTTGACGGTCGGAGCCCTGAACGGGATATCAACGGAGTGCTTCGCCG  
TTGATAGTTTCAGTTCCCTTGAATTTGGCGAAGTGTGTCTGCTGGTGCACATTCGAATCA  
GAAACTCTGTAATAGAGTTTCCATGGGATTGGGTCTTTGAGAGAGAAGAATGAAGAGGAG  
AAATAGTGGAGATCGATGTTGCATCTGATCGGAAAGTCCACGACGCTTGCAGCGACTCGT  
TGTCAGTCATCCTCTTGTGCTGGATCTCCACTATACCGCGCCCCGACGCGTTGATGGGAACC  
TGCTGCCTGTATTCTATGACGCAGTGGTCTATTTTCATACAGCTCCGAGTGAGTCGGGCGCT  
AATCTGTGACGCCGCCGACGGGAATTGGAGGACGATCTCGGTCAGGTCATGCGAAAGCTG  
ATACTCATCGCGATGGGATTCGATATAGTTGAATGCGTTCGGCGGCGCAACCAGCTTCGATT  
CCATTCCCCCTAGCCGTCGTTGTCCGGTCAACCAGGTTGAGCTAGAGATGATTGATCAATTG  
CGATTTAGGAAAGCAAACGAGAATGGAATCGTGGAGTGAGATGTTAATTGACAGGTTTCT  
GCGAGAGAGGAGATATTGAAAGAAGAGGACAGTGTTCAGCGCTTAATCTGTCTTCGTTTA  
TATAGACGATTAAGCAAAGGAGAAGTGAATTGAGGTCCGATATATAGCGCCGATGGCAT  
TTTTGTAATAAGAGATGAGTACCGATAGGAGGGAGGTGAGTACCGATTGGGGAGCTCTCA  
ACTTGGTGAAATGAATCGGGGAATGGTACTCAATTTATAGCAGAGTCCGTTAGGGTATATT  
GCCACGTGTCGGCCATCCGTATAATATT

>A\_MG-150\_LR\_LVV\_01\_-\_MN337873 Cleome leaf crumple virus (CILCrV) - DNA A

ACCGGATGGCCGCTGGATCTGTTTTATGTTTCGGCCCGCGCAAGCGGGAGAGTTGGGCCGAC  
GATGACAAAACTCGGCCAGATAAGAAAAGATGATAAGGGGACCACGTCCCAAAAAGG  
AACATATAGATGGGACCACATAAAGACAATGATTACGCCCAATAAGGATTGGGCAACAGA  
GCCAAGATATTCAAATATACTTGGCCGATAAGTTGATAAAGCTGTATAAATGGTCCCATCA  
CCCTTCGTGGTCTAGTGAGCCCCGACTAGGACTCGACGTTCTGTGGTGCAGAATGCCCAAG  
CGGGATGCCCATGGCGTACGCCTCAGGGACCACGAAGGTTAGTCGCAACGCCAACTACT  
CCCCTCGTGGAGGCACGGGCTCAAGACTAAGCAGGGCCACTGCTTGGGTTAATCGGCCCAT  
GTACAGGAAGCCCAGGATATATCGGATGTATAGGTCACCCGATGTGCCCAGAGGGTGTGA  
AGGCCCGTGCAAGGTCCAGTCTTACGAGCAGCGCCACGACATATCTCATGTGCGCAAGGTG  
ATGTGCGTGTCTGACATTACCCGCGGTAACGGTATTACCCACCGCGTGGGTAACGTTTTTG  
TGCAAGTCTGTGTATATATTAGGCAAGGTCTGGATGGACGACAACATCAAGTTGAAGAAC  
CACACGAATAGTGTGATGTTCTGGTTAGTTAGGGACAGGAGACCGTATGGCACTCCCATGG  
ATTTTGGCCAGGTTTTTAACCTGTTTGACAACGAGCCAAGCACCGCTACGGTGAAGAACGA  
TCTTCGTGATCGTTTTAGGTGCTGAACAGGTTCCACGTGAAGGTCCTGGTGGACAGTACG  
CGAGCAACGAGCAGGCGCTGGTTAGGCGCTTTTGGAGGGTCAACAACCATGTGGTGTACA  
ACCATCAGGAGGCTGCGAAATACGAGAACCATACGGAGAACGCTCTATTATTGTATATGGC  
ATGTAATCATGCCTCTAACCCTGTATATGCTACTTTAAAAATTCGGATCTATTTTTATGATTC

GATAACAAATTAATAAAGTTTGAATTGTATTGAATGGTTCTCGCGTACACGTCTTACATACG  
GTCGTCCGTTGCGAAGGTGACAGCTCGGATTACATTGTTAAGGCTAATAACGCCACGTTA  
TTTAGATACATGAGGACCAAATGTTTAAACCTATTTAAATAGGTCTGACCAGAAGCTGTCA  
CCGATACTGTCCAGACTTGGAAGTTGAGGAACGCCTTGTGGAGATCCAACGCTTTCCTCAG  
GTTGTGGTTGAACCGGATCTGGACGTGGTAGACCCGCGTCGTTCTGGACAGGATCTCCACC  
ACGTTGTACATCTTGAAATAAAGGGGATTTGTTATTTCCCAAGTATACACGCCATTCTCTGC  
CTGATGTGCAGTGATGAGTTCCCTGTGCGTGAATCCATTATTCGCGCAGTTTAGGTGGATG  
TATATTGTACATCCACAGTTCAGGTCGATACGTCTACGGCGAATGGCTCTCCGTTTCGCCAC  
TCTGTGTTGCACCTTGATAGAGGGGAGATTTCGAGGAAGACGAACCGCGCATTGTGAAGGGT  
CCACGACCGGAGTGCAGCATTCTCCTCTTCTCGAGGAAGTCTTTATAGCTGGCCCCCTCTC  
CTGGATTGCAAAGCACGATTGATGGGATACCGCCTTTAATTTGAACGGGTTTCCCGTATTTG  
CAGTTACTTTGCCAGTCTCGTTGGGCCCAACGAGTCTTTCCAGTGCTTTAGCTTTAGGTAG  
TGCGGGGCAACGTCATCGATGACGTTGTATGCGACCTCGTTTGTAGTAGACCCTCGAGTTGA  
AGTCGAGGTGTCCACTGAGATAATTGTGGGGACCTAAAGCACGTGCCACATCGTCTTCCC  
CGTCTCGAATCTCCTTCGACGATCAGACTTATTGGTCTGTTCCGCCGCGCTTCGGCGGATA  
AGGCGAAATACTCATCTGCCACGCCTGCATTTCTCGTCCGGAACGTTAGTGAATGAGGACAA  
CGGGAACGGAGGGACCCATGGTTCCGGAGCCTTGGCGAAGATTTTCTGGACATGTGCTTGC  
ACCTTGTCAAATGGAGGACGAAATCCCGCGGTTGCTCCTCCCTTAGAATCTGCAGTGCTTG  
CGCTGCAGACTCGGCGTTAAGGACCTTGGCGTATGTGTCGTTAGCCGATTGGCAACCGCCTC  
TAGCACTTCTCCCGTCGATCTGGAATGTTCCCCATTCCAGAGTATCCCCGTCTTTGTGACGT  
AGGACTTGACGTCGGAGCTCGACTTAGCTCCCTGAACGTTCCGGATGGAAATGTGCTGACCG  
GGACGGGGATAACCAGGTCGAAGAATCTTTGATTCTGGCATTGAACTTCCCCTCGAACTGG  
AGAAGTACGTGGAGATGAGGCTCCCCATTCTCGTGGAGCTCACGGGCGATCTTGATGAATT  
TCTTGTTCGTCGGCGTCGATAGGGCTTGCAATTGGGAAAGTGCTTCTCTTTGGTCAGGGAG  
CACTTTGGATAAGTGAGGAAATAATTTTTGGCGTTTATTTGGAAACGCTTTGGCGCCGATGG  
CATTTTGGTAAATAAGTGGTGAGTACCGATAGGAGGGAGGTGAGTACCGATTGGGGAGCTC  
TCAACTTGGTGAATGAATCGGGGAATGGTACTCAATTTATAGCAGAGTCCGTTAGGGTAT  
ATTTGCCACGTGTCGGCCATCCGTATAATATT

>A\_DF\_46\_LR\_LVV\_13\_-\_MT214083\_ Bean golden mosaic virus (BGMV) - DNA A

ACCGGATGGCCGCGGATTTTTTTTTAAAGGCCCATTCATTTTGGGCCGCTTGGGCCGTTCTTTA  
TTTGAATTAAGTAAAGTCATTTATTCTGACCAATAACTTTAGTTCTGACGGGTTAGTTAAT  
TTTGAACCTTGGCGACCAAGTCTTTACTAAACTATAAATTTAATCTTGTATTGACCATGTTCT  
TTAATTCAAATGCCTAAGCGTGATGCTCAATGGCGCCACATGGCAGGTACGTCAAAAATT  
AGCCGTTCCGGCTAATTTCTCCTCGTGGGGGAAATGGGCCTAAATACAACAAGGCCGCTG  
AATGGGTAAACAGGCCTATGTATAGGAAGCCAGGATATATCGAACTATACGAGGCCCTG  
ATGTTCCACGGGGCTGTGAAGGCCCGTGAAGGTTTCAAGTCTTATGAACAACGACATGATGT  
GTCACATGTTGGGAAGGTTATGTGTGTATCTGATGTAACAAGAGGTAATGGTATTACCCATC  
GTGTAGGAAAACGTTTTTGTGTTAAGTCTGTTTATATTTTAGGTAAGATATGGATGGACGAG  
AATATCAAGTTGAAGAATCACACGAACAGTGTGATGTTTTGGTTAGTCAGAGATCGTAGAC  
CGTATGGTACTCCTATGGACTTTGGTCAAGTTTTTAATATGTTTCGACAATGAACCCAGTACT  
GCTACTGTTAAGAACGATCTTCGTGATCGTTTTCAAGTTATGCATAAATTCTATGGAAAGGT  
GACAGGTGGACAATATGCTAGCAACGAACAGGCATTGGTCAAACGTTTTTGGAAAGGTGAA  
TAATTATGTAGTCTACAACCATCAAGAAGCAGGGAAGTACGAGAATCATAACAGAGAACCG  
ATTATTGTTGTATATGGCATGTACTCATGCCTCAAATCCAGTGTATGCTACTCTAAAAATTTCG  
GATCTATTTTTATGATTCGATCACCAATTAATAAAAATTTATATTTTATTTTCATGATTCTCAAGT

ACATAATTTACATATGATTTGTCTGTTGCGAAACGTACAGCTCTGATAACATTGTTAAGCGA  
AATAACACCTATTCTATCTAAATACAACAGCACTAAATATTTAAATCTATTTAAATATGTCG  
TCCCAGAAGCTTGAAGAGATATCGTCCAGACTTGAAATTCAGGAAAGCCTTGTGTAGATC  
CAGTTTGTTCCTGAGGTTGTGGTTGAACCGTATTTGGAGGTGGTATACTCTGGTCGTTGTGTA  
TTGTAGATCCTCTACGTTGTATATCTTGAATAAAAGGGGATTTGATATCTCCAGATATAACA  
CGCCATTCTCCGCTTGACGTGCAGTGATGCGTTCCTGTGCGTGAATCCATGACCGTAGCA  
ATTTATGTGTACATAAATTGTGCAGCCGCACTCTAAATCAACGCGACGTCGTCGATTGCTC  
GTTTCTTCGACGCTCTATGTTGAACTTTGATAGAGGGGGAGTCGAGGAAGATGAATTTGCG  
ATTATGTATTGTCCAGTTTTTGTAGAGCTGCGTTTTCTCTTTGTGAGGAAACATTTATAACT  
CGCTCCTTACCTGGATTGCAAAGCACGATTGATGGGATTCCACCTTTAATTTGAACGGGT  
TCCCGTATTTGCAGTTTGATTGCCAGTCTTTTGTAGCTCCCATCAATTCCTTCCAGTGCTTTA  
ACTTTAGATAGTGCGGTGCGATGTCATCAATGACGTTATACTCAGCATGATTTGAAAACAC  
CTTTGAGTTGAAATCCAGGTGACCACTTAGATAATTGTGGTCCCTAATGCACGTGCCACA  
TTGTCTTTCCCGTTCGTGAATCACCTTCGACGATGATACTAATAGGTCTCTCCGGCCGCGCA  
GCGGCACCTCTCCGAAATAATCATCTGCCATTCTTGATCTCTCTTGGCACGTTAGTGAA  
AGAGGAGAGGTGAAACGGAGGTGACCACGGATCCGGAGCCTTTGTGAATATTCTATCCAG  
GTTACTGGATAAGTTGTGATATTGGAAGAGAACTTTTCCGGCAGTTTCTCTTTGATTATTTG  
CATGGCTTCTTCTTTGAAGAAGCATTCAATGCTTCGGATGCCGCATCATTAGCTGTCTGTTG  
ACCTCCTCTAGCAGATCTTCCGTCGACTTGAAAATGACCCCATTCGATGTAATCACCGTCTT  
TCTCGATGTAGGACTTGACATCAGAGGATGATTTTGCACCTGTATATTGGCATGGGAGACG  
GAAGAGGTTGTTGGGTGTTTGTAGGTGCAACACTCTGCAATTCGTGCACTGGAACCTTGCCTC  
GAATTGGATAAGAGCATGCAGATGTGGTTCCCATTCCTCGTGAATTTCTCTGCAAATTTCTGA  
TGTATTTCTTGTTCACCGGTGTTTGTAGGTTCTGAAGTTGTTCAATTGCACTCTCTTTGGTAAT  
TGAACATTGTGGGTATGTGAGGAAATAATTCTTTGCGTTTATTTAAAACGCTTTGGTGGTG  
GCATACTTGTAATAAGAGGGTGTACCCCGATTGAGCTCTCGTTCAAAGTCTCTATGAATC  
GGTGAATGGTGCCAATATATAGTAAGAAGTTCTTTAAGGATCTGGAGACACGGGAGACAC  
GTGGCGGCCATCCGTTATAATATT

>A\_GO\_143\_LR\_LVV\_08\_MN928610 Tomato golden vein virus (TGVV) - DNA A

ACCGGATGGCCGCGGATTTTTTTAAAGTGGTCCCCTGTGAGTGACCAATCAGATTGTGTC  
TTGGACGGTATTTATTTTCGAAATACTTAGGCGCTAAGTTGTTAAAGTTGTATAAATTAGAC  
ATTCATAAGTGGTCGACATACTTTAATTCAAATGCCAAAGCGAGATGCCCCATGGCGTAT  
AGTGGCAGGGACCACGAAAGTATCCCGCTCTTCTAATTATTACCTCGGGGAGGTATACCC  
AAGCGGGATGCTTGGGTAAACAGGCCCATGTACAGGAAGCCCAGGATATATCGTACGTTG  
AGAGGGCCTGATGTTTCTAAAGGGTGTGAAGGCCCATGTAAAGTTCAATCCTATGAGCAAC  
GTCATGACATTTCTCATCTTGGCAAGGTGATGTGTATCTCTGATGTGACACGTGGTAATGGT  
ATTACACACCGTGTGGTAAGCGTTTTTGCCTAAGTCTGTGTACATATTGGGTAAGATATG  
GATGGACGAAAATATTAAGTGAAGAACCATAACAGTGTTATTTTTTGGTTAGTGAGG  
GATCGTAGACCCTATGGGACACCTATGGATTTTGGTCAGGTGTTAACATGTTTGATAATGA  
GCCTAGTACTGCTACGGTGAAGAACGATCTTCGTGATCGTTATCAAGTCATTCATCGATTCA  
ATGCTAAGGTTACGGGTGGACAGTATGCTAGCAACGAGCAAGCTCTTGTTCGGCGTTTCTG  
GAAGGTCAATAATCATGTGGTTTATAATCATCAGGAAGCAGGGAAATATGAGAATCATAAC  
GGAGAACGCTCTGTTATTGTATATGGCATGTAATCATGCCTCTAACCCCGTGTATGCTACTTT  
AAAATTCGGATCTATTTTTATGATTGATAACAAATTAATAAATTTTAAATTTTATTGAATG  
ATTTTCGAGTACAGCATTTACATATGATTTGTCTGTTGCGAAACGAACAGCTCTGATTACAT  
TATTAATGGAATAACGCCTAATTGATTCAGATACAATAAAACGAAATATCTAAATCTAGT

TAAATATGTCATCCCAGAAGCTCTCAGGGATGTCGTCCAGACTTGGAATTTAGAAATGCC  
TTGTGGAGACCCAACGCTTTCCGCAGGTTGTGGTTGAAACGTATCTGCACATGGTATATCCT  
GGTCGTTGTATAATAGGGGTCCTCGACGTTGGTTATCTTCAAATAGAGGGGATTTGTAATCT  
CCCAAATAAAGACGCCATTCTCTGCTTGAGGCACAGTGATGGGTTCCGCGGTGCGTGAATC  
CATTATTTCTACAGTTGATGTGGATGTATATGGAGCAGCCGCAGTTTAGGTCTATGCGTTTA  
CGCCTGGTTGTTTTCTGTTTGGCGGCTCTGTGCCGTGGCTTGATAGAGGGGGGAGTTGAGGA  
AGATGAATTTAGCATTATGCAGTGTCCAAGCTCTTAGAGATGCATTTTCATGTTTGTCAAGG  
AAGTCTTTATAACTAGCCCCCTCTCCTGGATTGCAAAGCACGATTGATGGGATCCCTCCTTT  
AATTTGAACCGGCTTTCCGTAATTGCAATTGCTTTGCCAGTCACGCTGGGACCCAATTAGTT  
CTTTCCAGTGCTTCATTTTTAGATAATGCGGAGTGACATCATCAATGACGTTATACTCCACTT  
CATTTGAATAAACTTTAGAATTAATAAATCCAAGTGTCCACTTAAATAATTATGTGGTCCTAGT  
GCACGAGCCACATAGTCTTCCCCGTCTAGAATCACCCCTCAATGATGATACTAATAGGTCT  
TTCCGGCCGCGCAGCGGCACCCCTTCCGAAATACTCATCAGCCATTGCTGCATCTCATCAG  
GAACGTGAGTAAAGGAAGATAAATCAAATATAGGGACCCATGGGGCTGGAGCCTTTGCAA  
ATATTTTTTGGACATGTGATTGTATTTTATCCAAATGAAGAACATAATCTCTAGGTTGTTCTT  
CTTTAATATATTTAAGGCCTTGATAGATTTTCTGCGTTTAGAACCTTCGCATAAGTGTGAT  
TGGCAGTTTGGCAGCCTCCTCTTGCTGATCTTCCATCGATCTGGAAATTTCCAAAATCAATG  
AAGTCTCCGTCTTTTTCCATGTAGGTCTTGACGTCGGACGAGCTTTTAGCTCCCTGAATGTTT  
GGATGGAAATGTGCTGATCTTGTGGGGATACCAAGTCGAAGAATCGTTGATTCTGGCATT  
GAATTTGCCTTCGAATTGAATAAGCACATGGAGATGAGGTTCCCATCTTCGTGAAATTCTC  
TGGTTACACGAATAAATTTCTGTTTGTGGTGTTTAAGTGCCTGTAATTGGGAAAGTGT  
CCTCTTTGGTTAATGAACAATGAGGGTATGTAAGGAAGAAATTTTTTGCATTTACAGTGAAA  
CGCTTTGGTGGTGGCATTGTAGTAAATAAGAAGATGAGACCCGATAGCTCTCCTTCAAACCT  
GGCGAAATGAATTGGGGAATGGGTCTCAATATATAGTAGAGTCCATTATAGAATATAATTG  
CCACGTGGCGGCCATCCGATATAATATT

>B\_GO\_143\_LR\_LVV\_08\_MN928611 Tomato golden vein virus (TGVV) - DNA B

ACCGGATGGCCGCGGATTTTTTTTTTGGTGGACCCATTCTGAAAGTAATTGAGCGCATTTTT  
GACGTCCGCGAATTGAGTTGAGCGCAATATTTGAGTTCCGAAAATATAGTTAGTGGAGTAA  
CTTTAATTTGAAATAAATTACAGCTTTTAGGGTAACCAATCAGCTTGCGATTCAGGAGTCTA  
TTTATCTATTACATTTATGTCAGTGTCAAGGTATACGGTATTCTTCACGTGGACCAATTAATT  
GTTGCTATGGAGTCTAACTAATTAATATACGAAGTGATGATTTTTTTATATAAATTCCATAT  
ATATTGTGGTAGATATGATATCGCATCATGTCTCCTACTAGCTATAGACGTGGTTGGTCGTTT  
GCTCAACGACGAGGTTATTCTCGTAAATATTTGTTCAAACGTCCTTATTATTTTAAACGTAC  
AGATGGGAAACACCGATCGGGTAACTCGAATCAGGTCAATGAGGATATTAAGTTGTCGCA  
ACAGCGTATACATGAGAACCAGTTTGGTCCGGAATTTGTAATGGGTCATAATACAGCAATA  
TCGACTTTTATCACTTTTCTAGTCTATGTAAAACCTGAACCGGGCAGATCCAGGGCATAACAT  
TAAGTTGAAACGTTTACGTTTCAAAGGTACCGTCAAGATTGAGCGTGTTTCATGCTGATGTGA  
CTATGGATGGTATAATACCAAAGATTGAAGGCGTATTTCTATGGTTGTCGTTGTTGATCGT  
AAACCCCATTTGAGTTCATCTGGTTGTCTGCATAACATTTGATGAGCTCTTTGGTGCACGGATC  
CACAGTCATGGCAATTTGGCTGTAACCTCATCTTTGAAAGAGCGTTTTTACATACGTCACGT  
TTGGAAGAAAGTAATATCTGTTGAGAAGGACAGTATGATGGTTGATCTTGAAGGAACGACA  
TCGTTGAGTAATAAGCGTTTTAATTGTTGGTCTGCTTTTAAAGATCTTGATCGTGATTCATGT  
AATGGTGTATGCGAATATAAGCAAGAACGCCCTTTTAGTTTATTACTGTTGGATGTCGGA  
TACGATGCTACGGCGTCATCTTTGTATCGTTCGATCTTGATTATGTTGGTTAAAAATTTAA  
ATATTAATGTATTTATACTTACATGAGAAAATAATTCATTTAAGAAAACGTGAGAAAATAA

ATCATTTAAGAAAACGTGAGAAAATAAATCATTTAAGAAAACGTAATCACATAATATAATT  
ATAATTACTGAAATATTGGCTGCGCAGCTGCATGCAAAAAAAAAAATATTGGCAACTGATAT  
TTATTTCAATGATTTGGGTTGTGGAGGAATACAGTTAGATTTAATACATTCTTGGACTGTTGA  
CCTAACAAAGATCGTTTAAATTGGGCCACTGACAGCGTGATGTTGGATTGCGTTCTTTGGGCC  
CAATTATTGAAGCCGAATCACCTGGATCTAATATGGCAGTTCCTAGCCTATTTAGATCTTTG  
TATGGATGTAACGCCTCCCCTAGGTCTGATTGGGCTTCTAATTGGGTCGTCTCTATTGTACTC  
CTTGTTGGCCCATGACTCTCCTGGATTTAGTTCTATTGGGCCATGAAGCCCAAATCTAGAAGT  
TGATGCCGATCTTATCAATTTTCTCTCCCACTTCCATAACCTACATGAGAGAAGTCGATGT  
CATTGACGGTAAATTGTTTGGACATTATCTTCACTGTGGGTGCCCTGAAAGGTATATCAACC  
GAATGTTTTGCCGTTGATAGCTTCAATTTTCTTTGAATTTTGCAGAGTGGGTCATCTGATGA  
ACGTTTGAGTCAGAAACCTTATAATATAGCTTCCATGGAATTGGGTCTTTGAGTGAGAAAA  
ATGATGACGAGAAATAGTGGAGGTCTATGTTGCACCTGATTGGAAAAGTCCATGACGCCTG  
TAAGGATTCATTTTCAAGTCATCCTCTTGTGATGAATCTCCACAATTACTGATCCAGTTGCGTT  
GATTGGTACCTGTTGCTATATTCAATGACGCAATGATCAATCTTCATACAGCTTCGATTTAG  
TCTTGCACCTAATTGAGTTGCTTTTGTGATGGAAATTGCAATATGATTTTCGGTAAGGTCATGAG  
ATAGTTGATATTCATCACGACGAGATTCTATATAAATTAAGGCGTTGGGTGGGCAAACCTAC  
TTGAGAGTCCATATGTATTACAAGATTGAATAAGTGTAGAGAATAATTTAGAAAAAGTAAA  
GGAAACAGTAGTAGTATAGATAAGATGAGTGAATGGATGTGATATTATACAGAATTGTCC  
ATCCTTATATAGACTCTTACTGGTTATGGATAAATTTGGTTAAACAATACTGAGTATACTTAC  
TAAATAAGTTTATAAAGTTACAGTGAAACGCTTTGGTGGTGGCATTGTAGTAAATAAGAAG  
ATGAGACCCGATAGCTCTCCTTCAAACCTGGCGAAATGAATTGGGGAATGGGTCTCAATAT  
ATAGTAGAGTCCATTATAGAATATAAATTGCCACGTGGCGGCCATCCGATATAATATT

### Sanger sequences

>DF\_677-DNA-B-ToRMV-DNA-B-F\_E06.ab1

TGTAGATGAAATTTAGACAGTCCACGTCGTAAATTTCTTGTATTTTTAACGAACGGTTGTAA  
TTACACCACGACAGGAAATAAACCAGCGAAATGATTGATCAATATGAACTATCCAACCTTT  
AATTCAAATTAAGGTGATTCACAATAGCGGATTTCAAAAAGACAATTAACCTATTTTCGCG  
GACTTCAAAAAGCGCTCAATTAATTAAGGAAAGCGGAGGCAACGTACACGATTTTCGCCA  
CGTAGCACATAAGAAAAATCGCGCGGCCATCCGGTAATATTATAACGGATGGCCGCCACG  
TGTGGCAATCTCCTTGAAGAAGAACTTCTACTATATAAGAGCTACCATAACTACCAATTCATA  
TGAGTTTTAGAGCAGCTACCATTTGGTAGTAAGGGTCATATTTACAAATATGCCCTTGCCTT  
GAAAATTCTATTTAAAGAGCAAGTAGAGGGGTATTTATCAATTACACCTAAAATAGACAAT  
ATCTCATCTCAATTCGTCGCTCCTGATTCCTCGTTTTTACTTATTATCATCTCCAATTTCCC  
AATTGGATCAACAGACAATTTTCTTGTGATATATTAGTTGACGAAAATATTATCCTCTTCCC  
TTATTAACCTTCTCAAACATTGTCGCTGCGCTCCCTATTTTCAATAATGGAATCTCAGCTTG  
TGAATCCTCCCAACGCATTTAATTATATAGAATCTAAGCGTGATGAATATCAGCTTTCCCAT  
GATCTAACCAGATAATGCTTCAATTCCTTCAACGGCGTCTCAATTAAGCGCAAGGCTTA  
GTCGTAGCTGTATGAAATCGACCATTGCGTAATAGA

>DF\_566-A-ToSRV-DNA-A-R\_H11.ab1

GCTGCCTGAAAAGTTCTTATTTCAAGTTTCACAATCTAAATAGTAATTTAGATAGGATATTTA  
CAAGGGCTCCGGAGCCATGGGCCCTACGTTTCCCCTCACCTCTTCACTAGCGTACCGAGA  
GAGATGCAAGCTTGGGCAGATGACTATTTTGGGAGAGGTGCCGCTGCGCGGCCGGAACGA  
CCTATTAGTATCATCATTGAAGGTGACTCTCGAACGGGAAAGACGATGTGGGCACGTGCAT

TAGGGGCCATAATTATTTGAGTGGACACCTAGATTTCAATCCTAGGGTTTATTCAAATCAT  
GTTGAATATAACGTCATTGATGACATCGCACCGCATTATCTAAAGTTAAAGCACTGGAAAG  
AATTGCTTGGGGCCAAAAGGATTGGCAATCAAAGTCAAATACGGAAAGCCAGTTCAA  
TAAAGGTGGTATCCCGTGCATCGTGCTTTGCAATCCTGGCGAGGGGGCCAGCTATAAATG  
TTTCTCGACAAAGAAGAAAATGCAAGTCTAAATAATTGGACAAAGCACAATGCGAAATT  
CGTCTTCCTTAACACCCCCCTCTATCAAGGTACAACACAGAGCTGCTAAAAAACGAGGAAT  
CAGGAGACGACGAATTGATATAGAGTGCAGGGTGTCTATTTACGTACACATCGACTGCAGA  
GGACATGGATTCACGCACAGGGGAATCATCACTGCACGTCAGGCAGAGAATGGCGTCTA  
TATTTGGGAGATATCAAATCCCCTCTATTTCAAGATAAACAGAGTGGAGGATCCAATGTAC  
ACCGCGAGCAGAGTGTACCACGTCAAATACGGTTCAACCAC

>GO\_118-DNA-A-ToRMV-DNA-A-F\_C06.ab1

TTTAGAACTACTTAACGCCCAAGTTGCATAACGGCTATAAATTAACCGTGCATATGTTCGAT  
AGCTTTAATTCAAATGCCTAAGCGCGATGCCCCATGGCGCCACATGGCTAGTACATCTAA  
GATTAGCCGGGGCGTTAATAATTCTCCACGTGCAGGAGTTGGGCCTCGGTCCAACAAGGCC  
ACTGACTGGGTAAACAGGCCCATGTACAGGAAGCCCAAGATATATCGGATGTATAGAACC  
CCCGATGTTCCAAGGGTGTGAAGGCCATGTAAAGTGCAGTCGTTTGAACAGCGTCACG  
ATATCTCCATACTGGTAAGGTGATGTGCGTCTCCGATGTGACACGTGGTAACGGTATTACA  
CACCGTGTGGGTAAAGCGTTTCTGTGTTAAGTCTGTGTATATTCTGGGTAAAGATATGGATGGA  
TGAGAACATCAAGTTGAAGAACCACACGAACAGTCCCATGTTCTGGTTGGTCAGGGACCGT  
AGACCTTATGGTACCCCTATGGACTTTGGCCAGGTGTTAACATGTTTCGACAACGAGCCTAG  
CACCGCCACTGTGAAAAACGATCTCCGTGATCGTTTTCAAGTCATGCATAAGTTCTATGCTA  
AGGTCACAGGTGGACAATACGCAAGCAACGAGCAGGCGCTTGTCAAGCGGTTCTGGAAGG  
TCAACAATCATGTCGTCTACAACCATCAAGAAGCTGGAAAATACGAGAATCATAACGGAGA  
ACGCCCTATTATTGTATATGGCATGTACTCATGCCTCAAACCCCGTGTACGCAACTTTAAA  
ATTCGGATCTATTTTTATGATTCGATAACAAATTA

>A DF\_529 ToMoLCV DNA A C06.ab1

ACCGGATGGCCGCGGGTTTTTTTTGACCCGCTCCGTGATGTATTTTTGTCTTTTACTATGT  
GGTCCAGTCAATAAATGACAAATATGACCGTCCAATCAGAAATGGTCCTCAAAGCCTAATT  
ATTTAAAATACTTGGTCACTAAGTTTGGTAAAGTTTATAAATGGTCCTTCTCGTAATGTTA  
TACCAACTTTAAGTCATAATGCCTAAGCGTGCATGCCCCATGGCGCTCAATGGCGGGGACCT  
CAAAGGTTAGTCGGTCCGCCAATTTCTCCCCTCGTGGAGGAATCGGGTCGAAATCAGAGAA  
GGCCCAGGCCTGGGTAAACAGGCCCATGTTTCAGGAAGCCCAGGATATATCGGATGTATAGA  
ACCCCGATGTACCAAAGGGATGCGAAGGCCCATGTAAGGTCCAATCCTTCGAGCAGCGT  
CACGATGTCTCTACATACGGGGAAGGTGATGTGTATTTCCGATGTCACCTCGTGGTAACGGTAT  
TACCCACCGCGTGGGTAAACGTTTTTGTGTCAAGTCTGTGTATATATTAGGCAAGGTCTGGA  
TGGACGACAACATCAAGTTGAAGAACCACACGAATAGTGTGATGTTCTGGTTAGTTAGGGA  
CAGGAGACCGTATGGCACTCCCATGGATTTTGGCCAGGTGTTCAACATGTTTGACAACGAG  
CCCAGTACTGCCACGGTGAAGAACGATCTCCGCGATCGTTACCAGGTCTGCACCGGTTCT  
ATGCCAAGGTTACAGGTGGACAATACGCCAGCAACGAGCAGGCTATTGTCAAGAGGTTCT  
GGAAGGTCAACAACCATGTGGTGTACAACCATCAGGAGGCTGGGAAAATACGAGAATCATA  
CGGAGAACGCTCTTTATTGTATATGGCATGTACTCATGCCTCTAACCCCGTGTATGCTACTT  
TAAAATTCGGATCTATTTTTATGATTCGATAACAAATTAATAAAGTTTAAATTTTATTGAAT  
GATTTTCGAGTACATAATTTACATATGGTT



>GO\_143-B-ToGVV-DNA-B-R\_G11.ab1

GCTTCATGGCCCATAGAACTAAATCCAGGAGAGTCATGGGCCACAAGGAGTACAATAGAG  
ACGACCCAATTAGAAGCCCAATCAGACATAGGGGAGGCGTTACATCCATACAAAGATCTA  
AATAGGCTAGGAACTGCCATATTAGATCCAGGTGATTCGGCTTCAATAATTGGGGCCAAA  
GAACACAATCCAACATCACGCTGTCAATGGCCCAATTAACGATCTTGTTAGGTCAACAGT  
CCAAGAATGTATTAAATCTAACTGTATTCTCCACAACCCAAATCATTGAAATAAATATCA  
AGTTGCCAATATTTTTTTTTTGCATGCAGCTGCGCAGCCAATATTTTCAGTAATTATAATTAT  
TATGTGATTACGTTTTCTTAAATGATTTATTTTATCACGTTTTCTTAAATGTATTATTTTCTCAC  
GTTTTCTTAAATGAATTATTTTCTCATGTAAGTATAAATACATTAATATATTAATTTTTAAC  
AATATAATCAAGATCGAACGATACAAATGATGACGCCGTAGACATCGTATCCGACATCCA  
ACAGTAATAAACTAAAAGGGCGTTCCTGTTATATTCGCATAAACACCATTACATGAATCA  
CGGTCGAGATCTTTAAAAGCAGACCAACAATTAACGCTTATTGCTCAATGATGTCGTTT  
CTTCAATATCAACCATCATACTGTCCTTCTCAACAGATATTACTTTCTTCAAACGTGACGTA  
TGTAACAAACGCTCTTTCAAAGATGGAGTTACAGCCAAATTGCCATGACTGGTGGATCCGTG  
CACCAAAGAGCTCATCAAAT

>GO\_143-A-ToGVV-DNA-A-R\_F11.ab1

AGTATTTCCGGAGGGGTGCCGCTGCGCGGCCGGAAAGACCTATTAGTATCATCATTGAGGGT  
GATTCTAGGACGGGAAGACTATGTGGGCTCGTGCCTAGGACCACATAATTATTTAAGTG  
GACACTTGGATTTTAATTCTAAAGTTTATTCAAATGAAGTGGAGTATAACGTCATTGATGAT  
GTCCTCCGATTATCTAAAAATGAAGCACTGGAAAGAACTAATTGGGTCCAGCGTGACT  
GGCAAAGCAATTGCAAGTACGGAAAGCCGGTTCAAATTAAGGAGGGATCCCATCAATCG  
TGCTTTGCAATCCAGGAGAGGGGGCTAGTTATAAAGACTTCCTTGACAAACATGAAAATGC  
ATCTCTAAGAGCTTGGACACAGCATAATGCTAAATTCATCTTCTCAACTCCCCCTCTATC  
AAGCCACGGCACAGAGCCGCCAAACAGAAAACAACCAGGCGTAAACGCATAGACCTAAA  
CTGCGGCTGCTCCATATACATCCACATCAACTGTAGAAATAATGGATTCACGCACCGCGGA  
ACCCATCACTGTGCCTCAAGCAGAGAATGGCGTCTTTATTTGGGAGATTACAAATCCCCTCT  
ATTTCAAGATAACCAACGTCGAGGACCCCTATTATACAACGACCAGGATATACCATGTGCA  
GATACGTTTCAACCACAACCTGCGGAAAGCGTTGGGTCTCCACAAGGCATTTCTAAATTT  
CAAGTCTGGACGACATCCCTGAGAGCTTCTGGGATGACATATTTAACTAGATTTAGATATTT  
CGTTTTATTGTATCTGAA

>DF\_640 New species#1 - DNA A-F\_A06.ab1

GCGCTCTATGGCGGGTATCTCAAAGGTTAGCCGCTCACTTAATTTCTCGCCTCGTGGAGGTA  
TTAATCCCAAATTTGATAGGGCCTCAGCGTGGGTCAATCGACCCATGTACAGGAAGCCCAG  
GATATATCGGACTATTCGAAGCCCTGATGTCCCTAAAGGGTGTGAGGGGCCCTGTAAAGGTC  
CAATCATTTGAACAGCGCCACGATATCTCCATACCGGGAAGGTGCTGTGTATATCTGATGT  
GACACGGGGCAGTGGTATTACCCACCGTGTCCGTAAGCGTTTTTGGTGAAGTCCGTTTATA  
TTTTAGGCAAGGTATGGATGGACGAGAACATCAAGTTGAAGAACCATACGAACAGCGTCA  
TGTTCTGGTTGGTTAGAGACAGGAGACCCTATGGCACGCCGATGGATTTTGGACAGGTGTT  
AACCTGTTTGATAATGAGCCCAGTACTGCGACTGTGAAGAACGATCTCCGGGATCGTTTCC  
AAGTGATGCACAGATTCCACACTAAGGTGACGGGTGGACAGTATGCGAGCAACGAGCAGG  
CTCTTGTCGGCGGATTTTGAAGGTCAACACCCATGTTGTGTACAACCATCAGGAAGCTGC  
GAAGTATGAGAACCACACGGAGAACGCCCTCTTATTGTATATGGCATGTACTCATGCATCT  
AACCTGTGTATGCAACCCTTAAGATCCGGATCTATTTCTACGATTCGGTATCGAATTAATA

AAGTTTGAATTTTATTGAATGATCTTCGAGTACAGATGTTACATATGGTCTGTGTGTTGCGA  
AACGAACAGCTCTAATTACATTATTAATGG

>DF\_640 New species#1 - DNA B-F\_B06.ab1

TTGGTTGATTATTAAGTTAACCGTGTGTATTTGCATAAAATATAGACAAGTGTGTACTGATT  
GTTATATTATAAATCCAAAAAATAATTATAAATAAGATATGGTCTTGCAAAATAAATAATT  
GTAATAACTTTATATTTATTTAATGACTTGGGTTGTTGTGGAGTACAATTTGTGTTAATGCA  
CTCTTGACCGTTGTCCTCACAATATCGTTTAGTTGGCCAACGACATTGTTATGTTGGATTG  
TGTCCTTTGAGCCCCGACTATTGAAGCTGATTCACCTGGGCTAGCATGGCGGTCCCTAGTC  
TGTTGAGTTCTCGATACGGATGTATTGTGTACCTATGTCGGACTCCGCATTTTCATGGCTGT  
ATCCTATCGTGCTTCTGGTAGCCCATGACTCTCCGGGCTTTAGTTCAATTGGGCCGGGTAGC  
CCAAATCTAGACGTGGAAGCGGATCGTATGAGCTTCTCTCCCATTTCCGTAGCCCACATG  
ACAGAAATCTATGTCTTTTTCTGTGAACTGCTTAGACAAGATTTTAACCGTCCGAGCTCGGA  
ATGGGATATCAACTGAATGTTTAGCAGTGGACAGTTGAGTTTGCCTTTAAATTTGGCGAAA  
TGTGTGCTCTGATGTACGTTGGTGTGCGAACTCTGTAATATAGCTTCCATGGAATTGGGTC  
CTTTAGGGAAAAGAAGGAAGAGGAGAAATAATGTAGATCTATGTTACACCTGATCGGAAA  
TGTCCATGACGCTTGAAGGATTCGTTGTCTGTCATCCTTTGTCATGAATCTCGACAATTAC  
CGAACCTGTAGCGTTGATA

>MG\_388-ToCmMV-R\_E11.ab1

TATTCAGATTAACGGCGAGAAACATATTTCTAACATATCCACAGTGCGATATACCAAAGA  
TGAAGCTCTTCAAATGCTTCAATGTCTTCCGTGGTCAGTCGTCAAACCCATATACATACGCG  
TCGCCAGAGAGGAACACTCCGACGGGTTCCCCCATCTTCACTGTCTTGTCCAACCTCTCCGGA  
AAATCGAATATCAAGGATGTTAGGTTTTTCGACCTCACTCACCCCAGACGGTCTGCCGGATT  
TCACCCAAATGTTCAAGCAGCCAAAGACACCAATGCAGTCAAGAATTACATCACCAAAGA  
AGGTGATTATTGTGAATCCGGACAGTACAAGGTGTCTGGGGGAACAAAGGCAAATAAAGA  
CGACGTGTACCACAACGCCGTCAATGCACCTTCTCCGGGAGAGGCTCTCGACATTATCAGG  
GCCGGAGACCCCAAGACTTTCCCTCGTCAACTATCACAATGTGAAGGCTAATCTAGAGAGGA  
TTTTCCAAAAGGCTCCGGCACCGTGGGTTCCCTCCGTTTCCCCTCTCCTCATTCACTAACGTGC  
CCGACGAGATGCAAGAATGGGCTGATGATTATTTTGAAGGGATGCCGCTGCGCGGCCTAT  
CAGACCTATCAGTATTGTCATCGAGGGTAATAGTCGGACGGGAAGACGATGTGGGCGCGT  
GCACTTGGCCCACATAATTATCTAAGTGGACACCTGGATTTCAATTCTAGGGTTTACTCAA  
CGATGTGCTGTATAACGTCATTGATGACGTCTCTCCGACTTAAAGTTAAAGCACTGGA  
AAGAATTGA

>MG\_378 New species#2\_B11.ab1

CCTGGGAGGTGCACAATCCCCTTTATTTCAAGATAACAAACGTGGAGGTTTTACTCCACGC  
AAACACAAGAGTGTACCACATCCAAATACGGTTCAACCACAACCTGAGGAGAGCGTTGGA  
TCTCCACAAGGCATACCTGAACTTCCAAGTCTGGACGACTTCACTGACAGCTTCTGGGACG  
ACTTACTTAAATAGATTTAAATTCTTGGTCAATCTGTACTTAGATCAATTAGGAGTTATTTGC  
ATTAACAATGTAATTAGAGCTGTTTCGCTTCGCAACAGACAAACCGTATGTAAATCATGTAC  
TCGAAGACCATTCAATAAAATTTAATATTTATTAATTTAAGACCGAATCATAAAAATAGAT  
CCGAATCTTAAGGGTAGCATAACAGGGTTGGAGGCATGCGTACATGCCATATACAATAAC  
AGGGCGTTCTCCGTGTGATTCTCGTACTTCCGGTCTCTTGGTGGTTGTAGACCACGTGGTTG  
TAGACCTTCCAAAACGCCGACAATAGCCTGCTCGTTACTGGCATACTGACCACCCGTGA

CCTTGGCGGAGAACTTGTGCAAAACCTGAAAACGATCACGGAGATCGTTCTTCACAGTAGC  
GGTACTGGGCTCATTATCATAACAGATTGAAAACCTGGCCGAAGTCCATAGGGTTACCATAC  
GGCCTCCTATCCCTAACTAACCAAAAACAATACGCTATTCGTATGGTTCTTCAACTTAATATT  
ATCGTCCATCCACACCTTCCCTAATATATACACAGACTTAACACAAAAACGCTTACCGACA  
CGGTGAGTATTACCATTACCCC

>MG\_150-DNA-B-ToCMoV-DNA-B-R\_G12.ab1

TATTTACTGTATAACCAAGATAACCCATTGATGCAGTCACAGCTATCTATATAACGGATTGA  
TATGGATAATTATAAAAACGTCCAGTAACAATTTTGAACATGTATTTTAATACTAATAAGCGT  
CGTTGGTTATCCACCAACCGTCGTAATTACGTGCGATATCCTACGTTTAAAAAGTCACATTC  
TGTGGTACGCAATGATGGGAAACGTGCGACTGGGTATTTCAAACAAGCCCCACGACGATAGT  
AAGATGTCTTCGCATACGATTCATGAAAACCAATATGGGCCTGACTTTGTATTGGGCCATA  
ATACAGCGATATCCACGTTTATAACTTACCCCTCTCTTGGTAAAAGTGAGCCCAATCGTATT  
AAGTCATACATTAAGCTGAAACGTCTGCGTTTTAAAGGTAAGTAAAGATTGAACGTGCTCC  
CAACGATTTGAACATGAATGGATTACCTGCTAAGATTGAAGGAGTATTTCTTTGGTTATTG  
TTGTCGATCGTAAACCTCATTGAGTCCTTCTGGAAGTCTCTACACATTCGATGAGTTATTG  
GTGCTAGGATCCATAGCCATGGAAATTTAGCGATAATCCCGTCTCTGAAGGATCGTTTTTAC  
ATACGTCATGTTGCTAAACGTGTCTTGTGAGTGGAGAAGGATAGTAATATGATTGACGTTGC  
TGGGATTACAACACTCTCTAGTAGGCGTTATAATTGCTGGGCAAATTTTAGAGATTTTCGATC  
ATGAATCCTGTAACGGTGTATATGCTAACATAAGCAAGAACGCCCTACTAGTTTATTATTGT  
TGGATGTCGGAAACAGTTTCCAAGCATCTACATTTGTATCATTG

>MG\_150-DNA-A-ToCMoV-DNA-A-F\_F06.ab1

ATATCGGATGGCCGCCACGTGTGTGAACGAGATTGAAAGTTCTATAGAGGGTTCTAGTATA  
TATAGGACCCCAGTCCCCAATTGCTTTAGTAAGTTTGGAGAAGACCCCAATCGGTGCCCAGC  
TATTATTACAAATATGCCACCGCCCAAACATTTCCGAGTAAATTCAAAAATTATTTCTGA  
CATATCCACACTGTTCTCTTTCCAAAGAAGAAGCACTTTCCCAATTATTAGCCCTAAACACA  
CCAATAATAAATTATTCATTCGTGTCGAGAGAACTACACGAAGATGGGCAACCTCATC  
TCCACGTGCTCATCCAATTCGAAGGAAAATACAACCTGCAAAAATAACAAGTTCTTCGACCT  
CGTCTCCCCAAGTAGGTCAGCACATTTCCATCCAAACATACAGGGAGCTAAGAGCTCGTCA  
GATGTCAAATCATAACGTGGAAAAAGACGGAGACTTCGTTGATCATGGAGTTTTCCAGATCG  
ATGGCAGATCAGCTAGAGGAGGTCAGCAATCTGCCAACGACACGTACGCCAAGGTTCTCA  
ACGCAGGATCTGTCATGGAAGCACTCAATATATTAAGGGAGGAACAACCCAAAGATTTCCG  
TGCTTCAACATCATAACATTAGGTCAAATTTAGAGCGTATTTTCGCAAAGGCTCCAGAACCT  
TGGGTTCTCCGTTTCCACTCTCGTCGTTCACTAACGTGCCTGTCGAGATGCAAGATTGGGT  
AGATAATTATTTCCGGAGAGATGCAGCTGCGCGGCCGGAGAGACCTATCAGTATAATAATC  
GAGGGTGATTCTCGAA

>MG\_122-DNA-B-ToRMV-DNA-B-F\_D06.ab1

TTATATAGAGGAAATTTAGACAGTCCACGTCGTAAATTTCTTATATTTTAAAGAACGGTTG  
TAATTACACCACGACAAACAATAAACAGCGAAATGATTGATCAATATGTACTATCCAACC  
TTTAATTCAAATTAAGTTGATTGACGGACAGCGGATTTCAAAAAGACAATTAATCATTT  
CGCGGACTTCAAAAACCGCTCAATTTAAATATAAAGCGCGAGGCAACGTACACGATTTCC  
GCCACGTAGCACATAAAAAAATCGCGCGGCCATCCGGTAATATTATAACGGATGGCCGCC  
ACGTGTGGCAATCTCCTTAAAAAGAACTTCTACTATATAAGAGCTACCATAACTACCAATT

CATATGAGTTTTAGAGCAGCTACCAATTGGTAGTAAGAGTCATATTTACAAATATGCCATTG  
CCTTAAAAATTCTATTTAAAGAGCAAATAGAGGGGCATTTATCATTACACCTTAAATAAAT  
AATATATCCTCTCAATTCGTCTCTCTGATTCTCTCGTTTTTTAGTTATTATCATCTCCAATTT  
CCCAATTGGATCAACAGACATTTTCTTGTATATATTCAGTTAACGAAAATATTATCCTCTTC  
CCTTATTAACTTTCTTCAAACACTGTCGCTGCGCTCCCTATTTTCAATAATGGAATCTCAGCT  
TGTGAATCCTCCCAACGCATTTAATTATATAGAATCTAAGCGTGATGAATATCAGCTTTCCC  
ATGATCTAACCGAGATTATGCTTCAATTTCTTCAACGGCGTCTCAATTAAGCGCAAGGCTT  
AGTCGTAGCTTTTTATGAAAATCGACCATTGCGTAATAGAATACAGACAA

>GO\_298-Gemycircularvirus\_E12.ab1

ACTCAGCCCACATCTCTAGACGTGGGTCTCTGTTAGCCAACCAGATGCAAGGTATGACTTG  
CAAGTTGTACGGGATCTCTGTACAGCTCTTTGACTGTGACCACACTCTGTGCCCAAGCCAC  
TCTTTCCATGAATGGAAATATCCAATACCACCTCGCATATCGTTCGAAGACAGCGTACGCAG  
CTCCCGGTGCATCACGCAGGAGAAGCTTGCCGGACACGATGCCATACTGTACACGTGTGG  
GCCAGTGATCTAGCCCAAACAGTCTTTCCAAGTCGTGAAGGACCATAGAGTACAAGAGA  
CCGCATTCTGCCTTGCTTAGTCAGCATTGCACACACTCACGTAGCGGTCCGAGCGGGCGGAG  
CGAGATCGGACCTTGCGGAACCGAGCACTACGCTGGCAAAAACCCCTAGGAGACTATAGA  
CCTCCCGAGAGAGCCCCGCGACCCAGAGGGGAGCGTAGGGCGATTGAGACGTACCTTCTA  
CTGGATCATTTGCAACAAGCTGTTCTCCCCATCGAGCCAGCTCAGGTACCATTCCAAGCTCA  
AATTGCTTCCCATCGGAACCCACATAGGGTCTGTTGGGGTGGGGGCGTAGGCGGCGTCCGCAT  
ACTTGTGAGCTCGGTCCAACGAGTGACAAGTGTCTTCGGATCCAGCTGTGCAAGCAGGTC  
AAAAAACTCGTCTCGACTTTCTGCCGAGACAATCTCGCGCCATTTATCCGCAACTTCAGGTA  
ATCCACCTCCGCCCCGGCTCGCCAACCCCCCTGCAACAACGTTTCCATCTTTGACTGCATAG  
TCGTAACCGAGCTCCGGACGACCTCGAGATGGCGTAAT

>GO\_169 New species#3\_D05.ab1

CCGCGGATTTTTGGAGTCCTATGCGCTCTGGCCCAGCCCATTTGAATTAAGATCGATATC  
TTTTCGTCTCGACCAATGATATCGCTTCTGGGAAGCCTAGATATTTGTTCCGATACTTACGGC  
CGAAGTTCTTGATTAACGGCTATAAATTAAGGAAGACTGGTCACAGTCTTTAATTCATAAT  
GCCTAAGCGGGACGCCCCGTGGCGCCTGATGGCGGGAACCTCGAAGGTTAGCCGCTCTACG  
AACAGTGCCCTCGTGGAGGGTTTGGCCTAAGATCAACAAGGCCTCTGAATGGGTAAACA  
GGCCAATGTATAGGAAGCCAGGATATACCGGGCTTTCAGAACTCCCAGCTTCCCTCGAGG  
GTGTGAAGGGCCTTGCAAGGTGCAGTCGTACGAGCAGCGACACGACGTCTCACATGTCCGGC  
AAGGTGATGTGCATATCCGATGTGACACGTGGTAACGGCATTACCCACCGTGTCCGTAAGC  
GTTTTTGTGTTAAGTCTGTGTACATTTTAGGTAAGATATGGATGGATGAGAATATCAAGCTC  
AAGAATCACACGAATAGTGCATGTTCTGGTTGGTCAGAGATCGTAGACCGTATGGTACCC  
CAATGGATTTTGGGCAGGTGTTCAACATGTTTCGACAACGAGCCCAGCACTGCCACGGTTAA  
GAACGATCTCCGCGATCGTTACCAGGTCTTGATAAGTTCTATGCCAAGGTCACCGGAGGA  
CAGTATGCCAGCAATGAACAGGCCCTAGTCAAGAGGTTCTGGAAGGTCAACAATCATGTG  
G

>DF-46\_BGMV DNA A

ACGGATTGCCGGCGAATTTTTACTGGGCCATCATGGCCGTGCCGTCTATGATAGTAAAGTC  
ATTATTCGACATACTAGTCGACGCTTAGTATTTGACTTGCGAACAAGTTCTTACTAACTAT  
ATTATCTTGTATGCATGTTCTTATCAAATGCTAGCGTGATGCTCATGCGCCACCATGCAGTA

CGTCAAATAGCGTCGCTATTCTCTCCTCGTGGGGAAATGGGCCTAAATACAACAAGCCG  
CTGAATGGGTTAACAGGCCTATGTATAGGAAGCCCAGGATATATCGAACTATACGAGGCC  
TGATGTTCCACGGGGCTGTGAAGGCCCGTGAAGGTTTCAGTCTTATGAACAACGACATGAT  
GTGTCACATGTTGGGAAGGTTATGTGTGTATCTGATGTAACAAGAGGTAATGGTATTACCA  
TCGTGTAGGAAAACGTTTTTGTGTTAAGTCTGTTTATATTTTAGGTAAGATATGGATGGACG  
AGAATATCAAGTTGAAGAATCACACGAACAGTGTGATGTTTTGGTTAGTCAGAGATCGTAG  
ACCGTATGGTACTCCTATGGACTTTGGTCAAGTTTTTAATATGTTTCGACAATGAACCCAGTA  
CTGCTACTGTAAAGAACGATCTTCGTGATCGTTTTCAAGTTATGCATAAATTCTATGGAAAG  
GTGACAGGTGGACAATATGCTAGCAACGAACAGGCATTGGTCAAACGTTTTTGGAAAGTG  
AATAATTATGTAGTCTACAACCATCAAGAAGCAGGGAAGTACGAGAATCATAACAGAGAAC  
GCATTATTGTTGTATATGGCATGTACTCATGCCTCAAATCCAGTGTATGCTACTCTAAAAATT  
CGGATMTATTTTTATGATTTCGATCACCAATTAATAAAATTTATATTTTATTTTCATGATTCTCA  
AGTACATAATTTACATATGATTTGTCTGTTGCGAAACGTACAGCTCTGATAACATTGTTAAG  
CGAAATAACACCTATTCTATCTAAATACAACAGCACTAAATATTTAAATCTATTTAAATATG  
TCGTCCCAGAAGCTTGAAGAGATATCGTCCAGACTTGGAATTCAGGAAAGCCTTGTGTAG  
ATCCAGTTTGTTCCTGAGGTTGTGGTTGAACCGTATTTGGAGGTGGTATACTCTGGTCGTTGT  
GTATTGTAGATCCTCTACGTTGTATATCTTGAAATAAAGGGGATTTGATATCTCCAGATAT  
ACACGCCATTCTCCNGCTTGACGTGCAGTATGCGTTCCCCTGTGCGTGAATCCATGACCGT  
AGCAATTTATGTGTACATAAATTGTGACGCCCACTCTAAATCAACCGGACGTCGTCGATT  
GCTCGTTTCTTCGCAGCTCTATGTTGAACTTTGATAGAGGGGGAGTCGAGGAAGATGAATT  
TCGCATTATGTATTGTCCAGTTTTTGTAGAGCTGCGTTTTCTCTTTGTGCGAGGAAACATTTAT  
AACTCGCTCCTTCACCTGGATTGCAAAGCACGATTGATGGGATCCCACCTTTAATTTGAACG  
GGTTCCCGTATTTGCAGTTTGATTGCCAGTCCTTTGAGCTCCCATCAATTCCTCCAGTGC  
TTTAACTTTAGATAGTGCGGTGCGATGTCATCAATGACGTTATACTCAGCATGATTTGAAAA  
CACCTTTGAGTTGAAATCCAGGTGACCACTTAGATAATTGTGGGTCCCTAATGCACGTGCC  
ACATTGTCTTTCCCGTTCGTGAATCACCTTCGACGATGATACTAATAGGTCTCTCCGGCCGC  
GCAGCGGCACCTCTCCGAAATAATCATCTGCCATTCTTGCATCTCTTTGGCACGTTAGT  
GAAAGAGGAGAGGTGAAACGGAGGTGACCACGGATCCGGAGCCTTTGTGAATATTCTATC  
CAGGTTACTGGATAAGTTGTGATATTGGAAGAGAACTTTTCCGGCAGTTTCTCTTTGATTA  
TTTGCATGGCTTCTTCTTTNGAAGAAGCATTCAATGCTTCGGATGCCGCATCATTAGCTGTC  
TGTTGACCTCCTCTAGCAGATCTCCGTCGACTTGAAAATGACCCCATTCGATGTAATCACC  
GTCTTCTCGATGTAGGACTTGACATCAGAGGATGATTTTGCACCTCTGTATATTGGCATGGG  
AGACGGAAGAGGTTGTTGGGTGTTTGTGGTTCGAACTCTGCAATTCGTGCACTGGAACCT  
GCCTTCGAATTGGATAAGAGCATGCAGATGTGGTTCCCCATTCTCGTGAATTTCTCTGAAA  
TTCTGATGTATTTCTGTTACCGGTGTTTGTAGTTCTGAGTTGTTCAATTGCACTC

>DF23-Alpha satellite

ACCCCGCTTCGCCACAACCTCTTCGCCAAAGGGACCCACTCTAGCAATATAAATATGACTAT  
TTTGTGCCTATTGCCTTCATAATCCAAATGACACAAAGTCGAAATTGGTGCTTTACTCTCTTT  
GCATACACCCTCCCTCTCTTTGACTCTCTCCCCGAGTGGGCTAATTATATAGTTTTCCAGGAA  
GAGGAGTGTCTACGACCAAGAAGAGACACCTACAGGGGTTTCGTTACTCTCAAGAAGAGT  
CAAAGGCTATCCTTTCTGAAAGGCAGATTAGGTAATGGCGTCCATCTCGAGATCTCTCGGG  
GATCCTCATCCAGCAATAGAGATTATTGCAGAAAGGATGATTCAGAGTCGCTGGGCCATG  
GGAATTCGGTGTACTTGCAGAGCAGGGGAGCAATAAGAGGAAGACGATGGAACGTTTTCA  
GGAAGACCCAGAGGAGGTCCGACTGGCCGACCCTAAGTTATATCGTTCGCTGCCTGGCGAC  
AAAGATTAATAAGGAGTTCCGTGGTCTGGTACTCCCTGCATTTGACAGACCTTGGCAGCTGC

TGGTTGAGAAGATATTGGACAAGGGCCCAGATGACAGAACTATCTTATGGGTGTATGGCTC  
TCAAGGCAATGAAGGCAAGACGACCTGGGCCAAGTCTAAGATTCAGGCCGGCTGGTTCTA  
CTCCAGAGGAGGAAAGGGAGAGAACATCAAGTACTCGTACGCCGAGCACCTAGGTCATGT  
CATATTTGATCTGCCCAGACAGGTTGAAGATGTGCTCCAATACTCGGTTCTGGAGGAAATTA  
AGGACAGGTTAATTAGGAGTGGTAAATACGAGCCTATAGATTTTAATTGTAGTGACAAGGT  
TCACATTGTCGTTTTAGCTAATTCCTCCCATCGTTAGATGTTGAGCACGATAATAAGGGAA  
ATGTAATTAAGCGCCAACTGTTAAGCAGAGACAGGGTATGTATAGTTAACATTGACGAGTC  
TGTTGTTGTACGAGAAGAAGAAACGGTGACGTTTGCTCGTTATTTGAATAAAAAGAAAAAA  
ACTTGTTTTTGTACAGAAAAAAAGGACTCCGCCTGGTGTCTGGCTTATATTTACAAATT  
TGCCATCACCCACTAACAACACTATGAAAAGAAGGGACCGCAGGGACCACAACCAAAAAAA  
AAGAAAAGAAAACCACTAACCAACAGGGATCGATGACGTGGACAACAACAGTTTTTTGTT  
ACCGGTGACGTGTCAGTCATATGTGTTAGTTACCGGTTCTATTGCCTTGTAAGGTGACCGGC  
TACCGTGGCGAGCTACCGGTAAGAAGCGGGTATAGTATT

>DF\_166 SiMMV - DNA A-F\_C02.ab1

ACCGGATGGCCGCGGATTTTTCCCCCCCCCACGTGGCGCGCTGGTGGTTCGTGCGATCTCT  
CTCCCCCCTCTCGCGCGACGTGGAGCTCTGGTGTCCGCGCGGTGTCCCCGCCGCGCGCTCT  
GCCTTTAATTTAAATTAAGGAAATAACTTTCATCAGGACCAATGAAATTGCGTCTTTAAG  
CCTAGATATCAGCGTAAGACTTGGGCCCTAAGTTGTTTGACGGCTATATAATTAAGTCATGT  
ATGACGTCAGGAATTATTCGAAATGCCAAGCGGGATCCCTCATGGCGCCAGATGGCGGG  
AACCTCAAAGGTTAGCCGCTCTACCAACTTTTCCCCTCGTGGAGGTGGAGGCCCAAAGTAC  
AACAAGGCCTCAGAATGGGTTACAGGCCCATGTATAGGAAGCCCAGGATATACAGGATG  
ATAAGGACTCCTGATGTTCCAAGAGGCTGTGAAGGGCCCTGTAAGGTCCAGTCTACGAGC  
AGCGTCACGACATCTCACATGTCGGGAAGGTCATGTGCATATCTGATGTCACACGTGGCAA  
CGGTATTACCCACCGTGTGGGTAAACGTTTTTGTGTCAAGTCTGTGTATATATTAGGCAAGG  
TCTGGATGGATGACAACATCAAGTTGAAGAACCACACGAATAGTGTGATGTTCTGGTTAGT  
TAGGGACAGGAGACCGTATGGCACTCCCATGGATTTTGGCCAGGTGTTCAACATGTTTGAC  
AACGAGCCTAGCACCGCCACTGTGAAAAACGATCTCCGTGATCGTTTTCAAGTCATGCATA  
AGTTCTATGCTAAGGTCACAGGTGGACAATACGCAAGCAACGAGCAGGCGCTTGTCAAGC  
GGTCTGGAAGGTCAACAATCATGTGCTCTACAACCATCAAGAAGCTGGAAAATACGAGA  
ATCATA CGGAGAACGCCCTATTATTGTATATGGCATGTACTCATGCCTCAAACCCCGTGTAT  
GCAACTTTAAAATTTCGGATCTATTTTTATGATTTCGATAACAAAT

>MG\_016 EuYMV - DNA A-F\_C03.ab1

ATCTGGTCTCGTAAGGTGCCGGCTGGTTATCCGAATACGTTCCCCGTGAATTATCATAATGT  
CAAAGCTAACGTCGAGCGCCTCTTTATTAAGCCACCCCTTCCTTGGGTTCCCCATTTTCAGC  
TGTCGTCATTTAACAATGTCCCGTCTGATTTGCAAGAGTGGGCTGATGATTATTTTGGAAAGG  
GGTGCCGCTGCGCGCCAGATAGACCTATTAGTATCGTAGTCGAGGGGGATAGTCGAACG  
GGTAAGACCATGTGGGCTAGAGCTTTAGGCCACATAATTATCTTAGTGGGCATCTCGATTT  
CAATTCTAGGGTTTACTCAAATGACGTGGAGTACAACGTCATTGATGATGTCGCTCCGCATT  
ATCTAAAGTTAAAGCACTGGAAAGAGTTGATTGGGGCCCAAAGGGACTGGCAGTCCAAC  
GTAATATGGAAAGCCGTTCAAATTAAGGCGGGATACCATCAATCGTGCTGTGCAATCC  
AGGCGAGGGGGCTAGCTATAAAGACTTCTCAACAAAGAGGAGAATGCATCGTTGAGAGC  
TTGGACACGCAAGAATGCTAAATTCATCTTCTCCACGCCCCCTCTATCAAAGCACAGCAC  
CGAATAGCC

>MG\_016 EuYMV - DNA B-F\_A03.ab1

CCACGTACCCCCTGGTGTCTAGAGGCTTTTAATATAAATGGGACACCAGGACACCACGAA  
AAATAGGTTTTAGAGAGGACTCCCCCTGGTGTCTGACTTCTATTTACAAATTTGCCATCAG  
CCGTGTCATATCGCATCTGACTGCCTATATATAGACCTTCAATAGCTAACATATAGGCAAA  
TTCCACTTCTTCATCTCAGATTACCAGCCGATTAATCATAATCTGCACATAGGCTTATCGT  
ATCTTCGAAATTTCCCCAAATTGTTATCGCTAACGCATATCGTCCTTCCATAAGGTTGGCAC  
CTATCAATTTCCCTCAGTCGTTCAATTTGGGGGAAGGGGTGCCGCTGCGCGGGCAAGTTTCC  
ATAATATAATGGAGGGTCTCAGTTAGTAAATCCGCCGAGCGCTTTCATTACATAGAGTC  
ACATCGTGACGAGTATCAGCTATCGCACGACCTAACTGAGATAGTCTTGCAATTTCCCATC  
AACGGCGTCTC

>MG\_150 CILCrV - DNA A-F\_B01.ab1

CCTTCGGGACCACGAAGGTTAGTCGCAACGCCAACTACTCCCCTCGTGGAGGCACGGGCTC  
AAGACTAAGCAGGGCCACTGCTTGGGTTAATCGGCCCATGTACAGGAAGCCCAGGATATA  
TCGGATGTATAGGTCACCCGATGTGCCAGAGGGTGTGAAGGCCCGTGCAAGGTCCAGTCT  
TACGAGCAGCGCCACGACATATCTCATGTCCGCAAGGTGATGTGCGTGTCTGACATTACCC  
GCGGTAATGGTATTACCCACCGCGTTGGTAAGCGATTTTGCCTCAAGTCTATGTACATACTA  
GGCAAGGTCTGGATGGACGAGAACATCAAGTTGAAGAACCACACGAACACGGTGATGTTG  
TGGTTAGTTAGGGACAGGAGACCTTACGGGACGCCCATGGATTTTGGACAGGTTTTAACCT  
GTTTTTCTATGAGCCAAGCACCGCTACGGTGAAGAACGATCTTCGTGATCGTTTTCAGGTG  
CTGAACAGGTTCCACGTGAAGGTCAGTGGTGGACAGTACGCGAGCAACGAGCAGCGCTGG  
TTAGGCGCTTTTGGAGGGTGAACACCCATGTGACGTATAACCACCAGGAGGCGGCGAAGT  
ACGA

>MG\_150 CILCrV - DNA B-F\_A04.ab1

TTTTGAAACGTGTATTGTCGGTTCGAGAAGGACTCTCTGATGGTGGATATAGAAGGGACGAC  
CGTCTTGTCTAGCAAGCGGTTTAGCTGTTGGTCATCGTTTAGGGATCTCGAGAGAGATTCAT  
GTAATGGAGTCTATGCTAATATTAGCAAGAACTCCCTTTTAGTTTACTACTGCTGGATGTCG  
GACGCGATTTCCAAGGCGTCGACATTTGTATCATATGATCTGGACTATGTTGGCTGAATAAA  
GTGATTAATGATGTTTATGAAGATAAACATGTGACAACATATAGAGGATAATCTGAATTAC  
AGGCACGATAACTATTCTAAAGGCTTGGTATGCCAAGGGACACAGTTTGTATTTATGCATTC  
CTGGACCGTCGTCTTTACTATCTCGTTGAGTTGGGCTAGCGACAGCGTTATGTTGGACTGTGT  
CCGCTGAGCCCCAAGTACAGAGGCAGACTCTCCTGGGTCCAGGATTGGTGTACCCAATCTG  
TCTAGGTGCCTGTATGGATGCAGCGCATCCCTCCGTTTCAGAATCCGCATCGGTATGGGCCG  
AGTCGATAGCACTTTTGACGGCCCAAGACTCTCCTGGTTGTATTTGATTGGGCCGCCAAC  
CCATA
